# Supplementary material for: Chloroplast acquisition without the gene transfer in kleptoplastic sea slugs, Plakobranchus ocellatus
Source: bioRxiv or medRxiv preprint supplement (doi:10.1101/2020.06.16.155838), 2021-02-18
Supplement: Supplementary file [file media-1.pdf]

a "d38" group

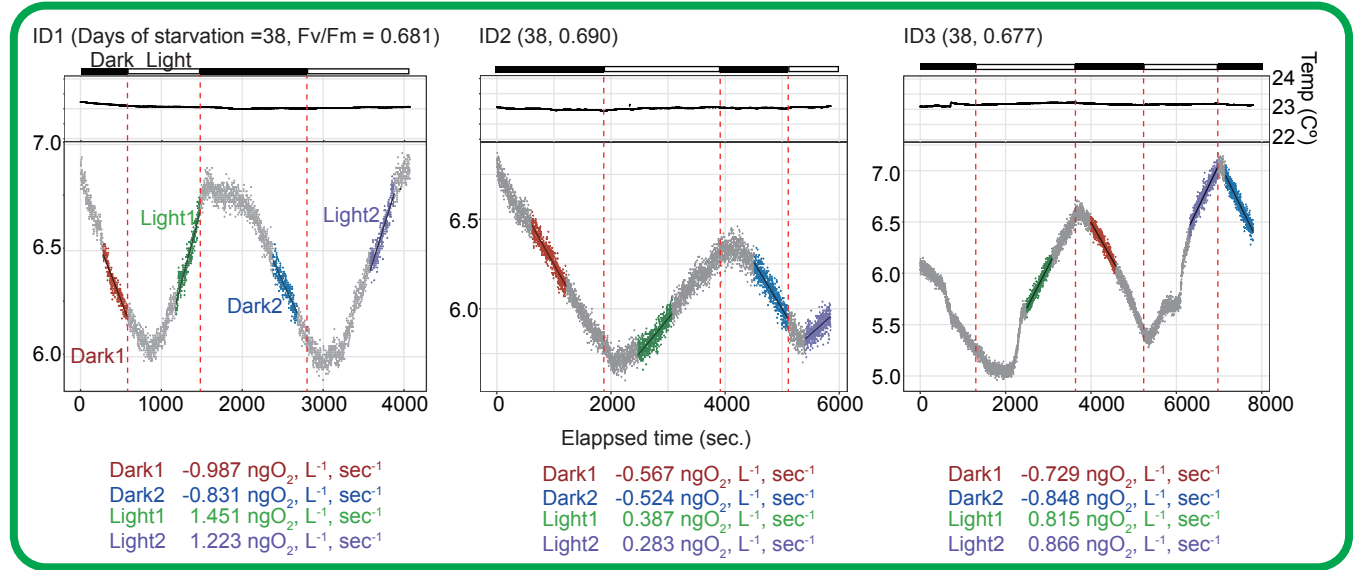

"d109" group

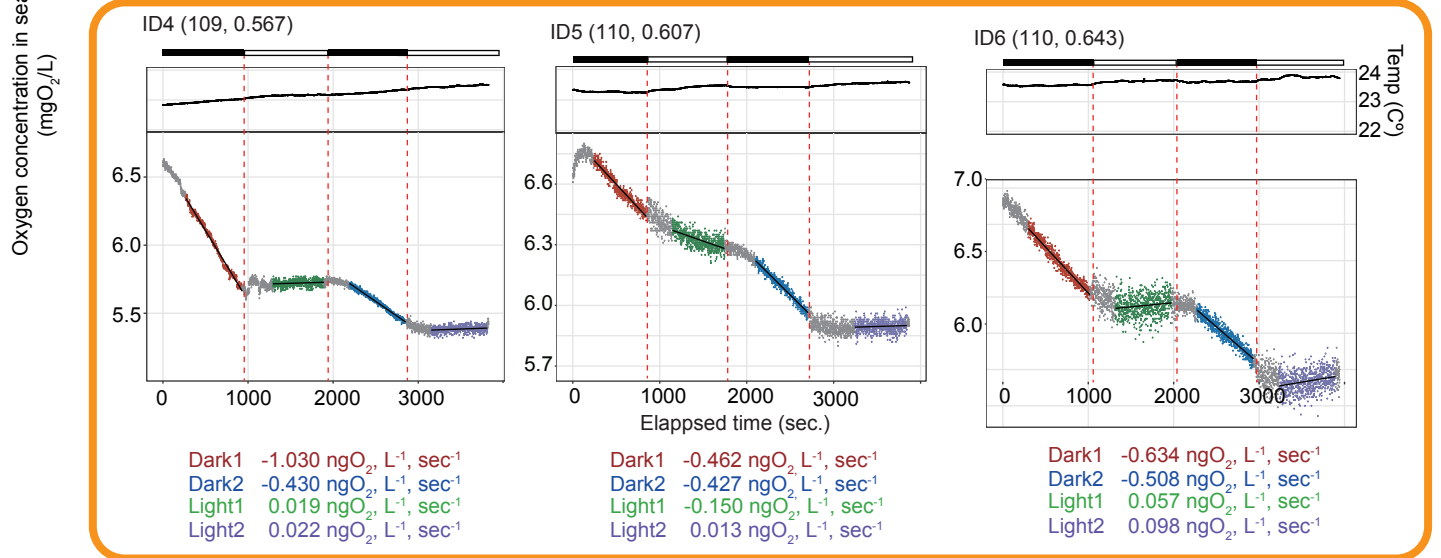

Mock (Without sea slug)

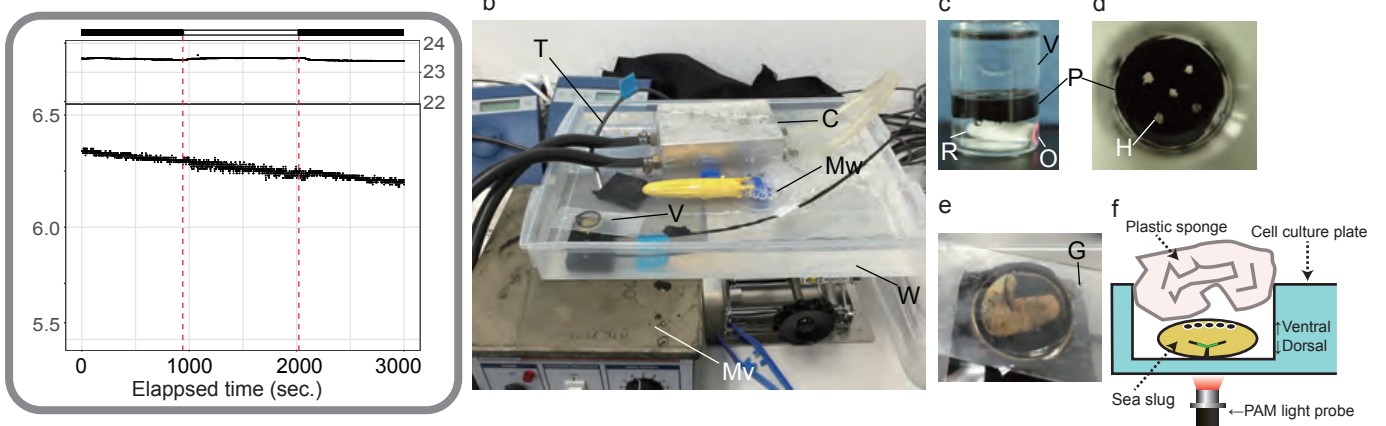

Supplementary Figure 1 Light-dependent oxygen generation by *P. ocellatus*.

a Oxygen concentration time-course of sample-rearing seawater. Each plot means a result from a single PoB individual in a vial filled with seawater. Raw data, DOI [10.6084/m9.figshare.12301865](https://doi.org/10.6084/m9.figshare.12301865). b-e Oxygen measurement system. b Overview of the applied oxygen measurement system. C, Iron chilling block; Mw, Mixer for lagging water; Mv, Mixer for sea slug rearing seawater; V, Glass vial caging a sea slug; W, Plastic tray filled with lagging water for the vial. c Horizontal view of glass vial. O, Oxygen sensitive optode; P, Rubber-made partition plate to separate sea slug from optode and rotor; R, Rotor for seawater agitation. d Top view of the vial. H, Hole for water ventilation. e Top vial view with a sea slug. G, glass plate sealing the top of the vial. f Diagram of PAM measurement method. Horizontal view of the sea slug in a well of the cell culture plate and positions of a sponge and a light probe.

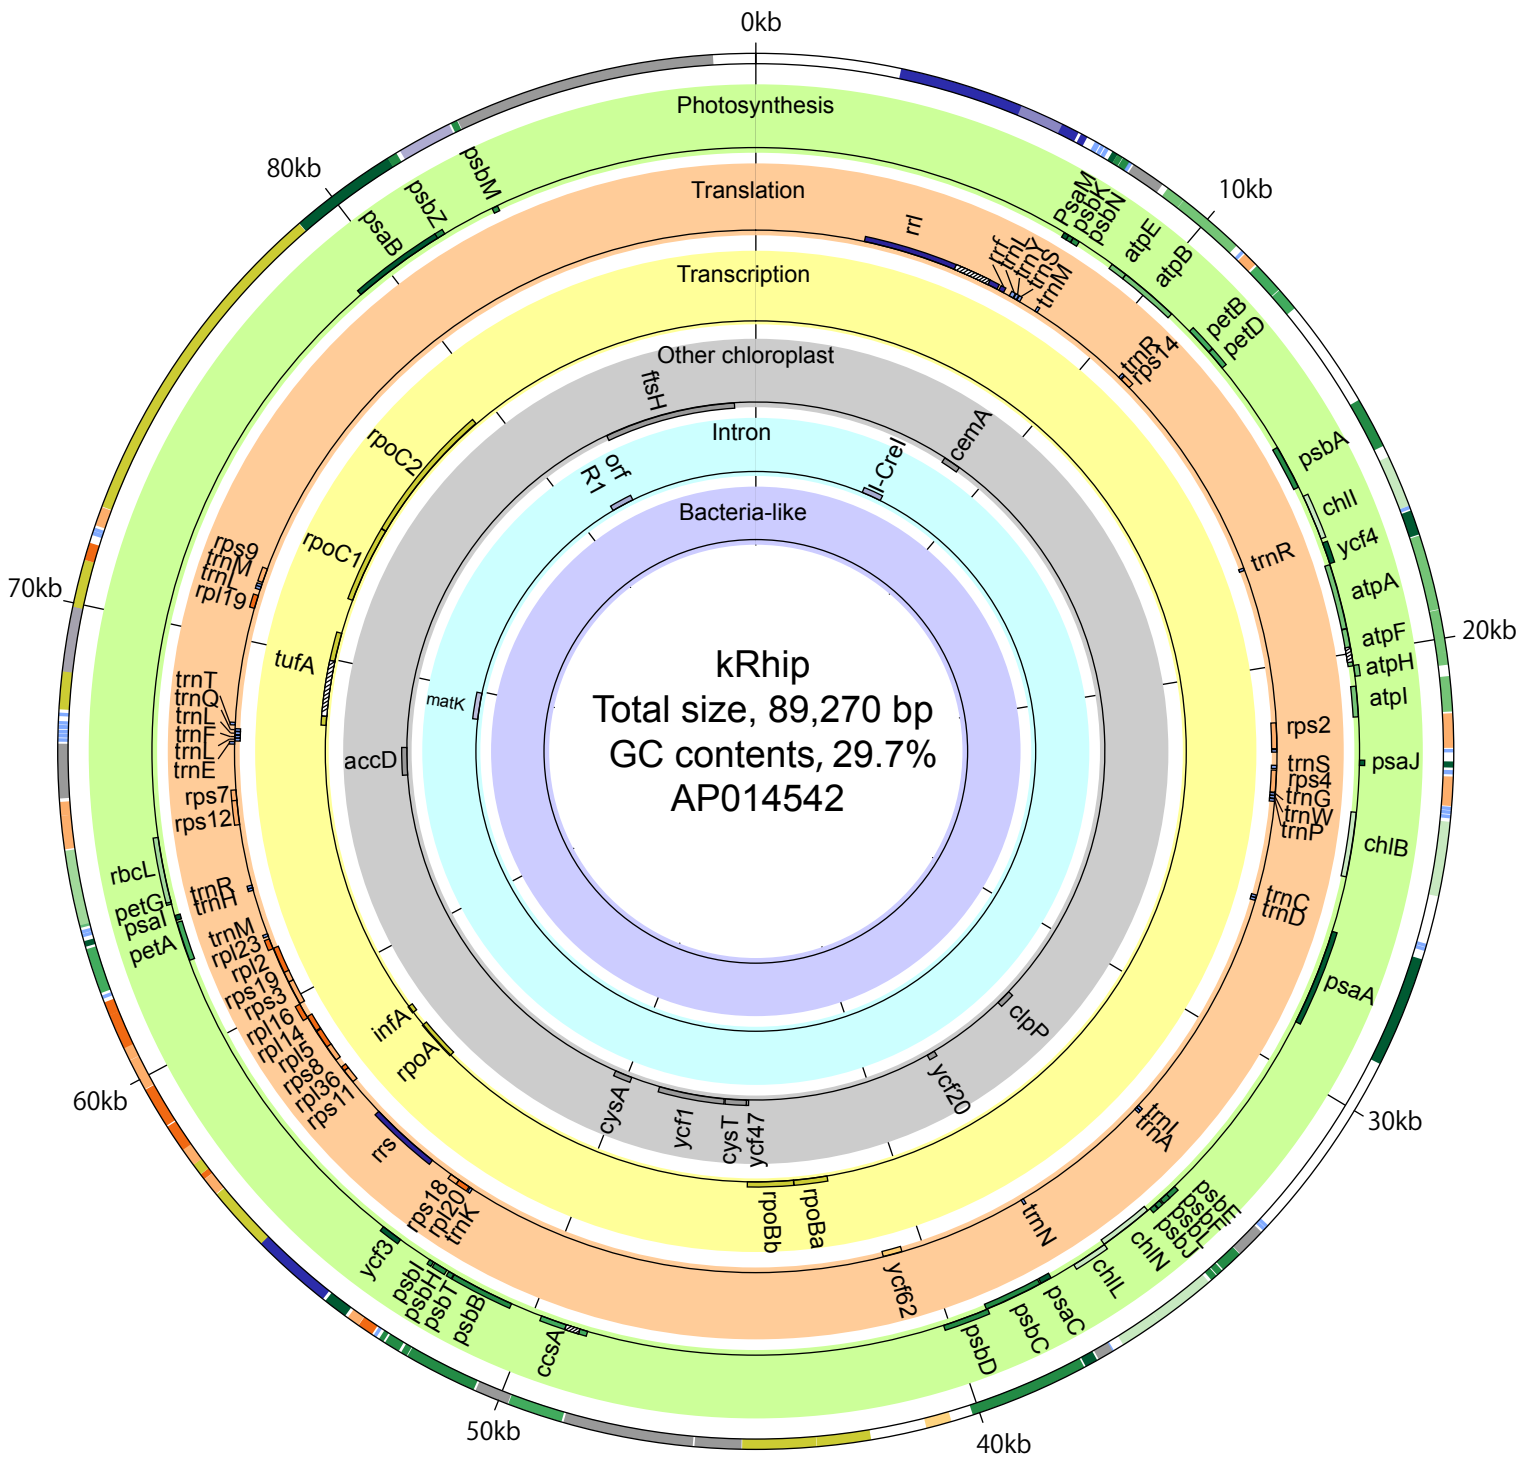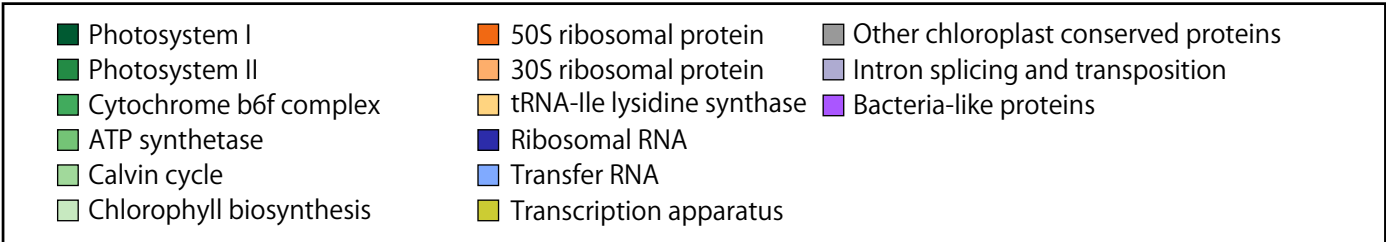

**Supplementary Figure 2** Gene map of a *P. ocellatus* kleptoplast DNA sequestered from *Rhipidosiphon lewmanomontiae*. The outer circle shows the distribution of all genes on kpDNA. Colors show functional categories of the genes (the corresponding between the color and the category was presented in the boxed legend). Inner circles show the names and positions of genes related to photosynthesis (2nd circle), translation (3rd) and transcription (4th), other conserved chloroplast genes (5th), genes relating intron-splicing and transposition (6th) and bacteria-like genes (7th). Genes on the outside of each circle are transcribed in the clockwise direction; genes on the inside are transcribed in the anticlockwise direction. Hatched boxes on the inner circles show introns.

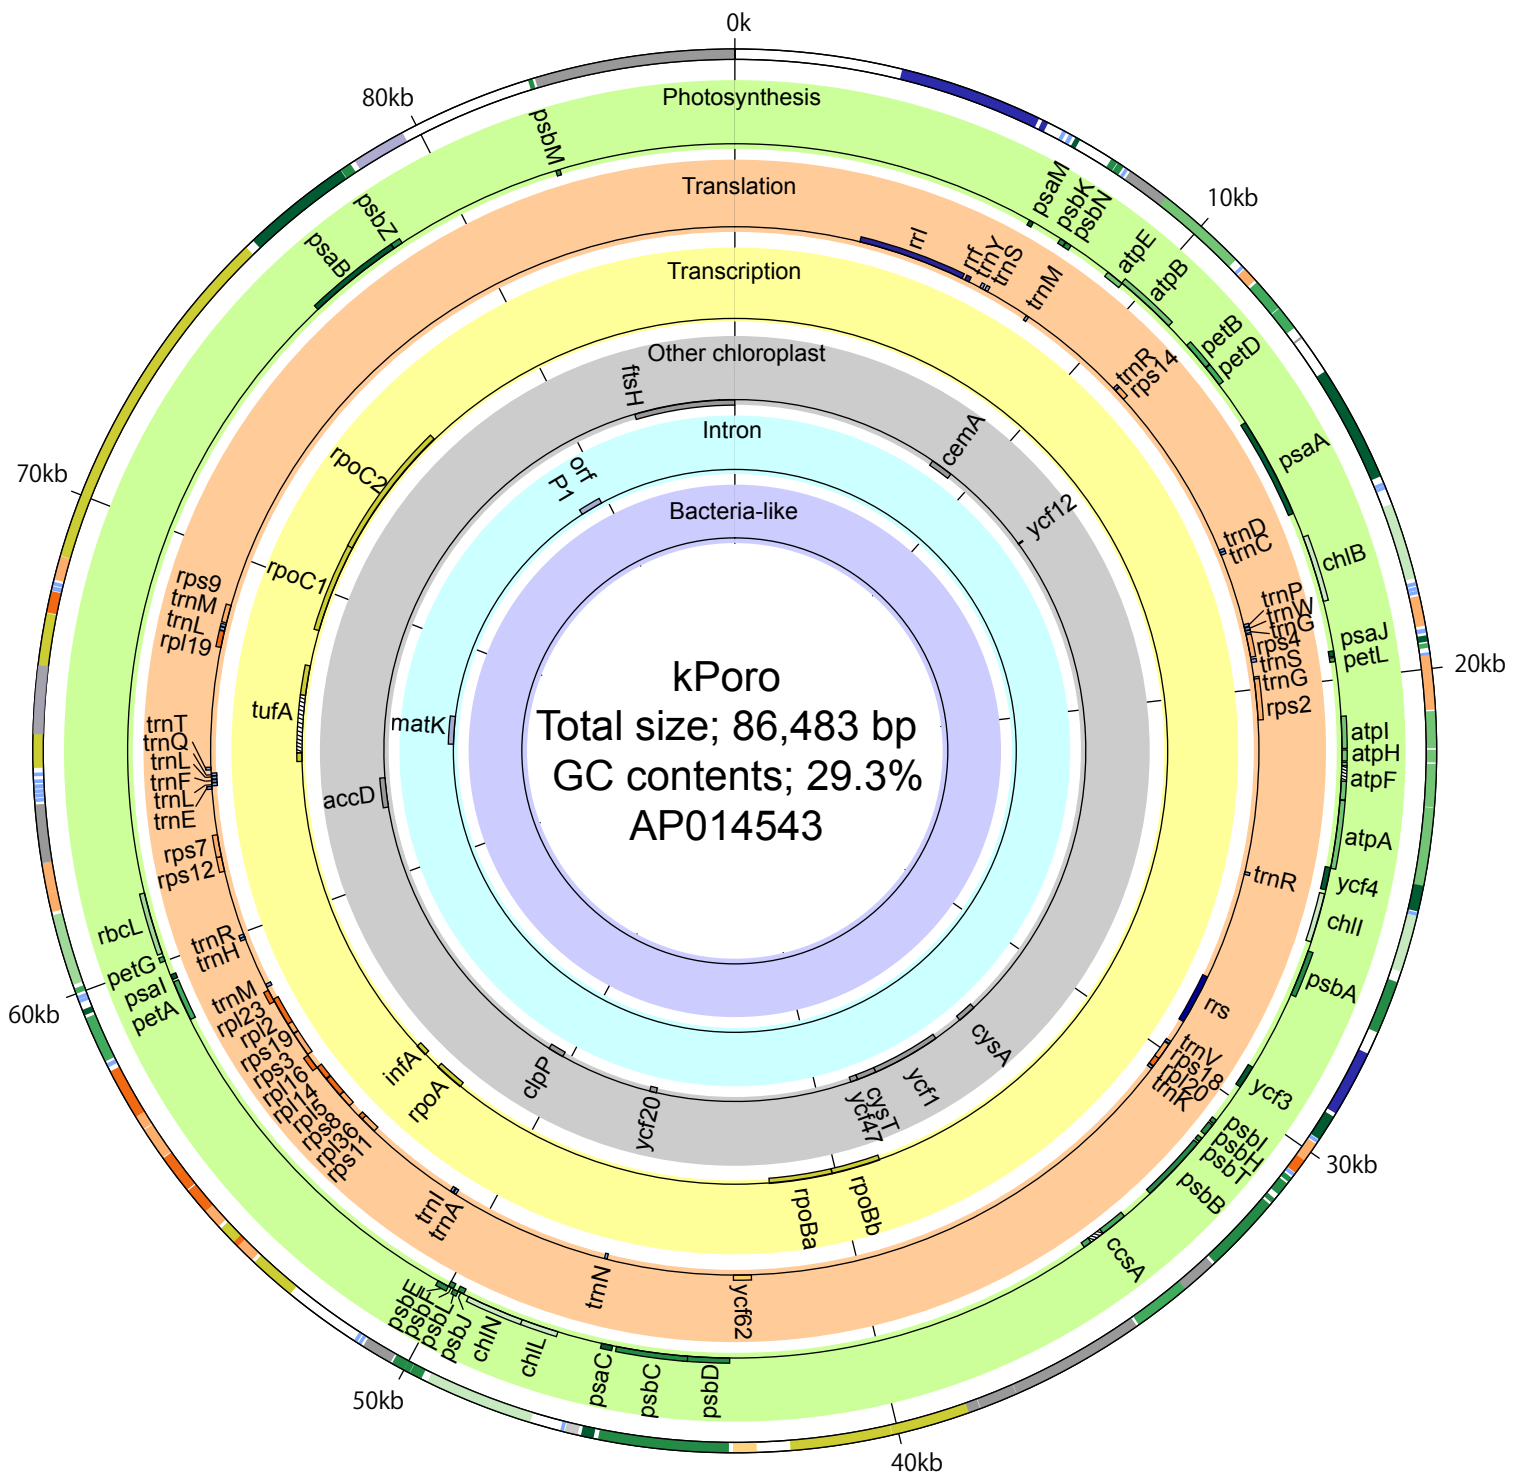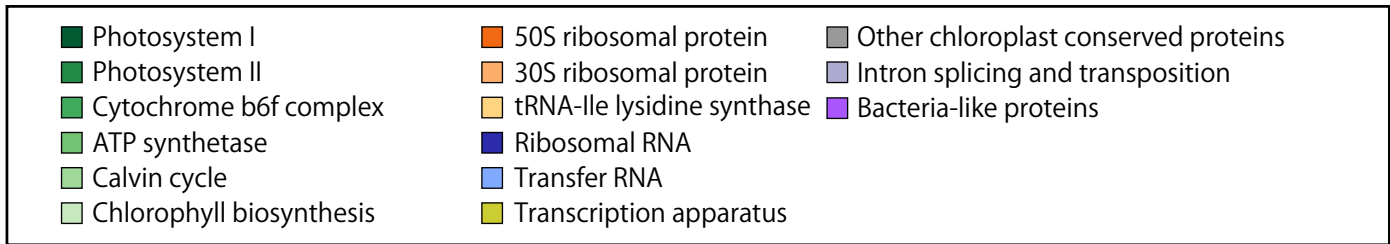

**Supplementary Figure 3** Gene map of a *P. ocellatus* kleptoplast DNA sequestered from *Poropsis* spp. Circles and colors are as in Supplementary Figure 2.

**a**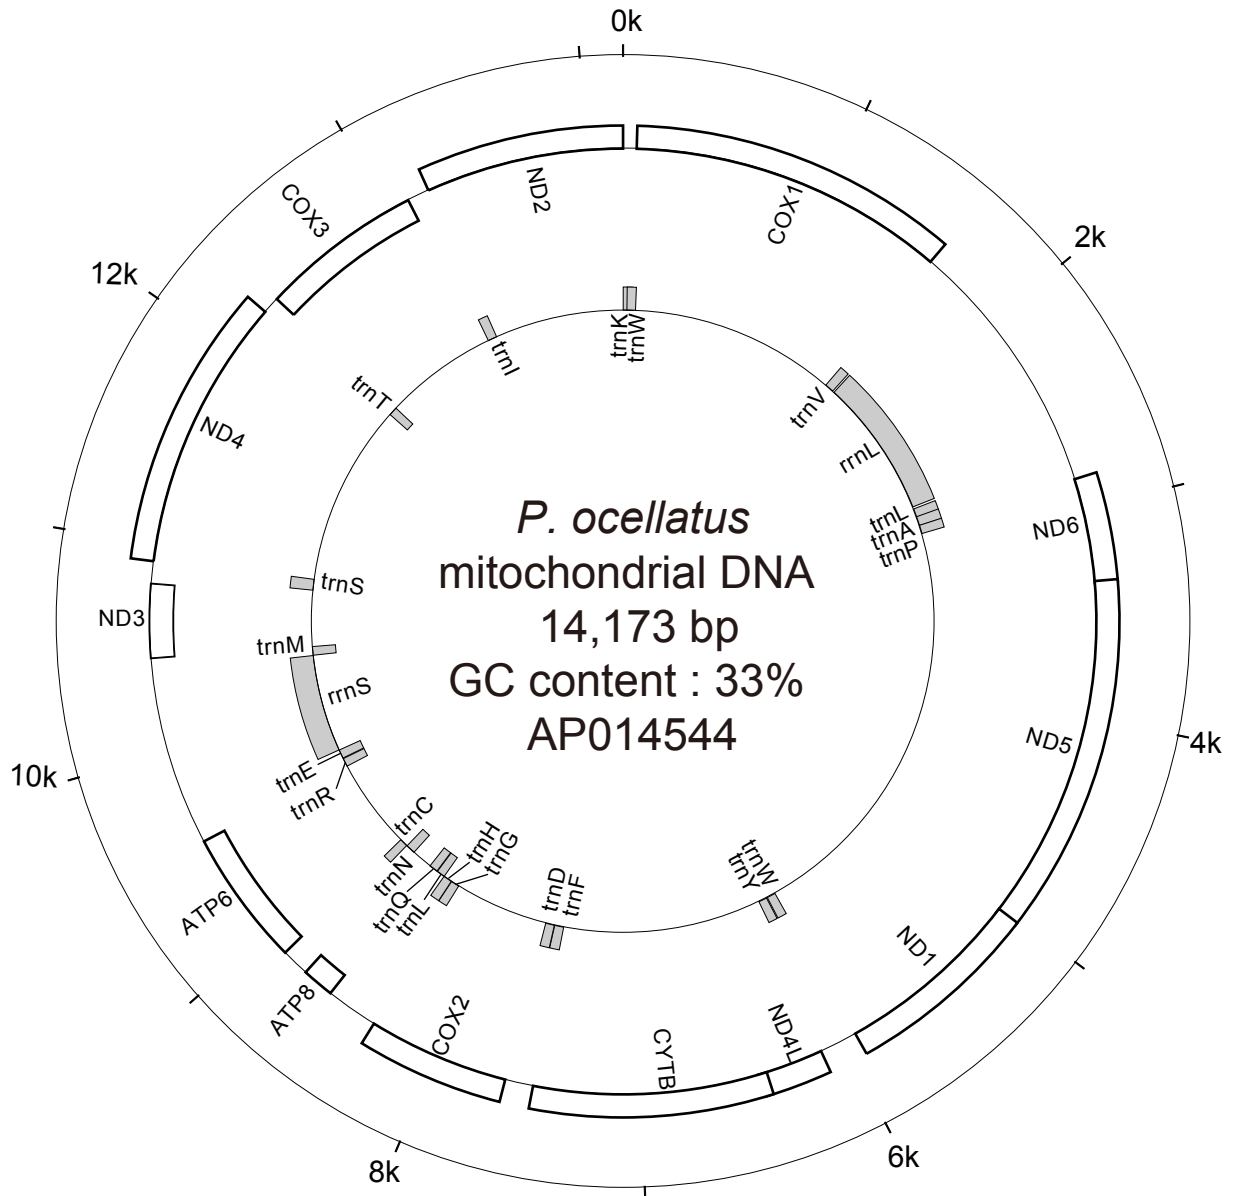**b**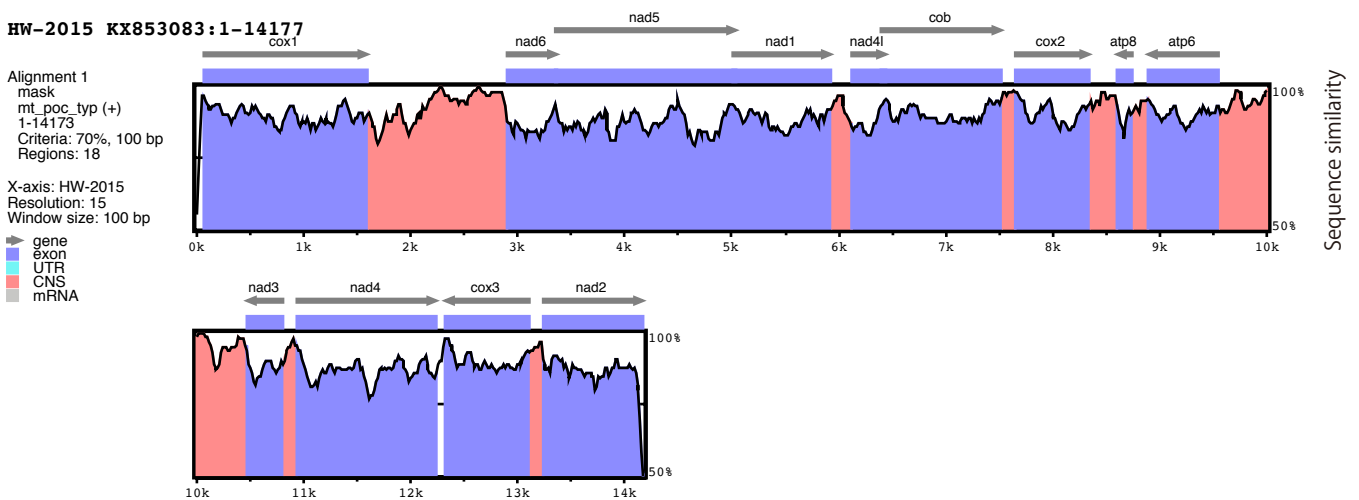

**Supplementary Figure 4** Gene map of a *P. ocellatus* type black mitochondrial DNA.

**a** The outer circle gives the scale in base pairs. Inner circles show the names and positions of protein-encoding genes (2nd circle) and structure RNA encoding genes (3rd). **b** Sequence similarity between our *P. ocellatus* type black mitochondrial DNA and previously sequenced ones from *P. cf. ocellatus* HW-2015 (KX853083). Data were visualized with mVISTA software.

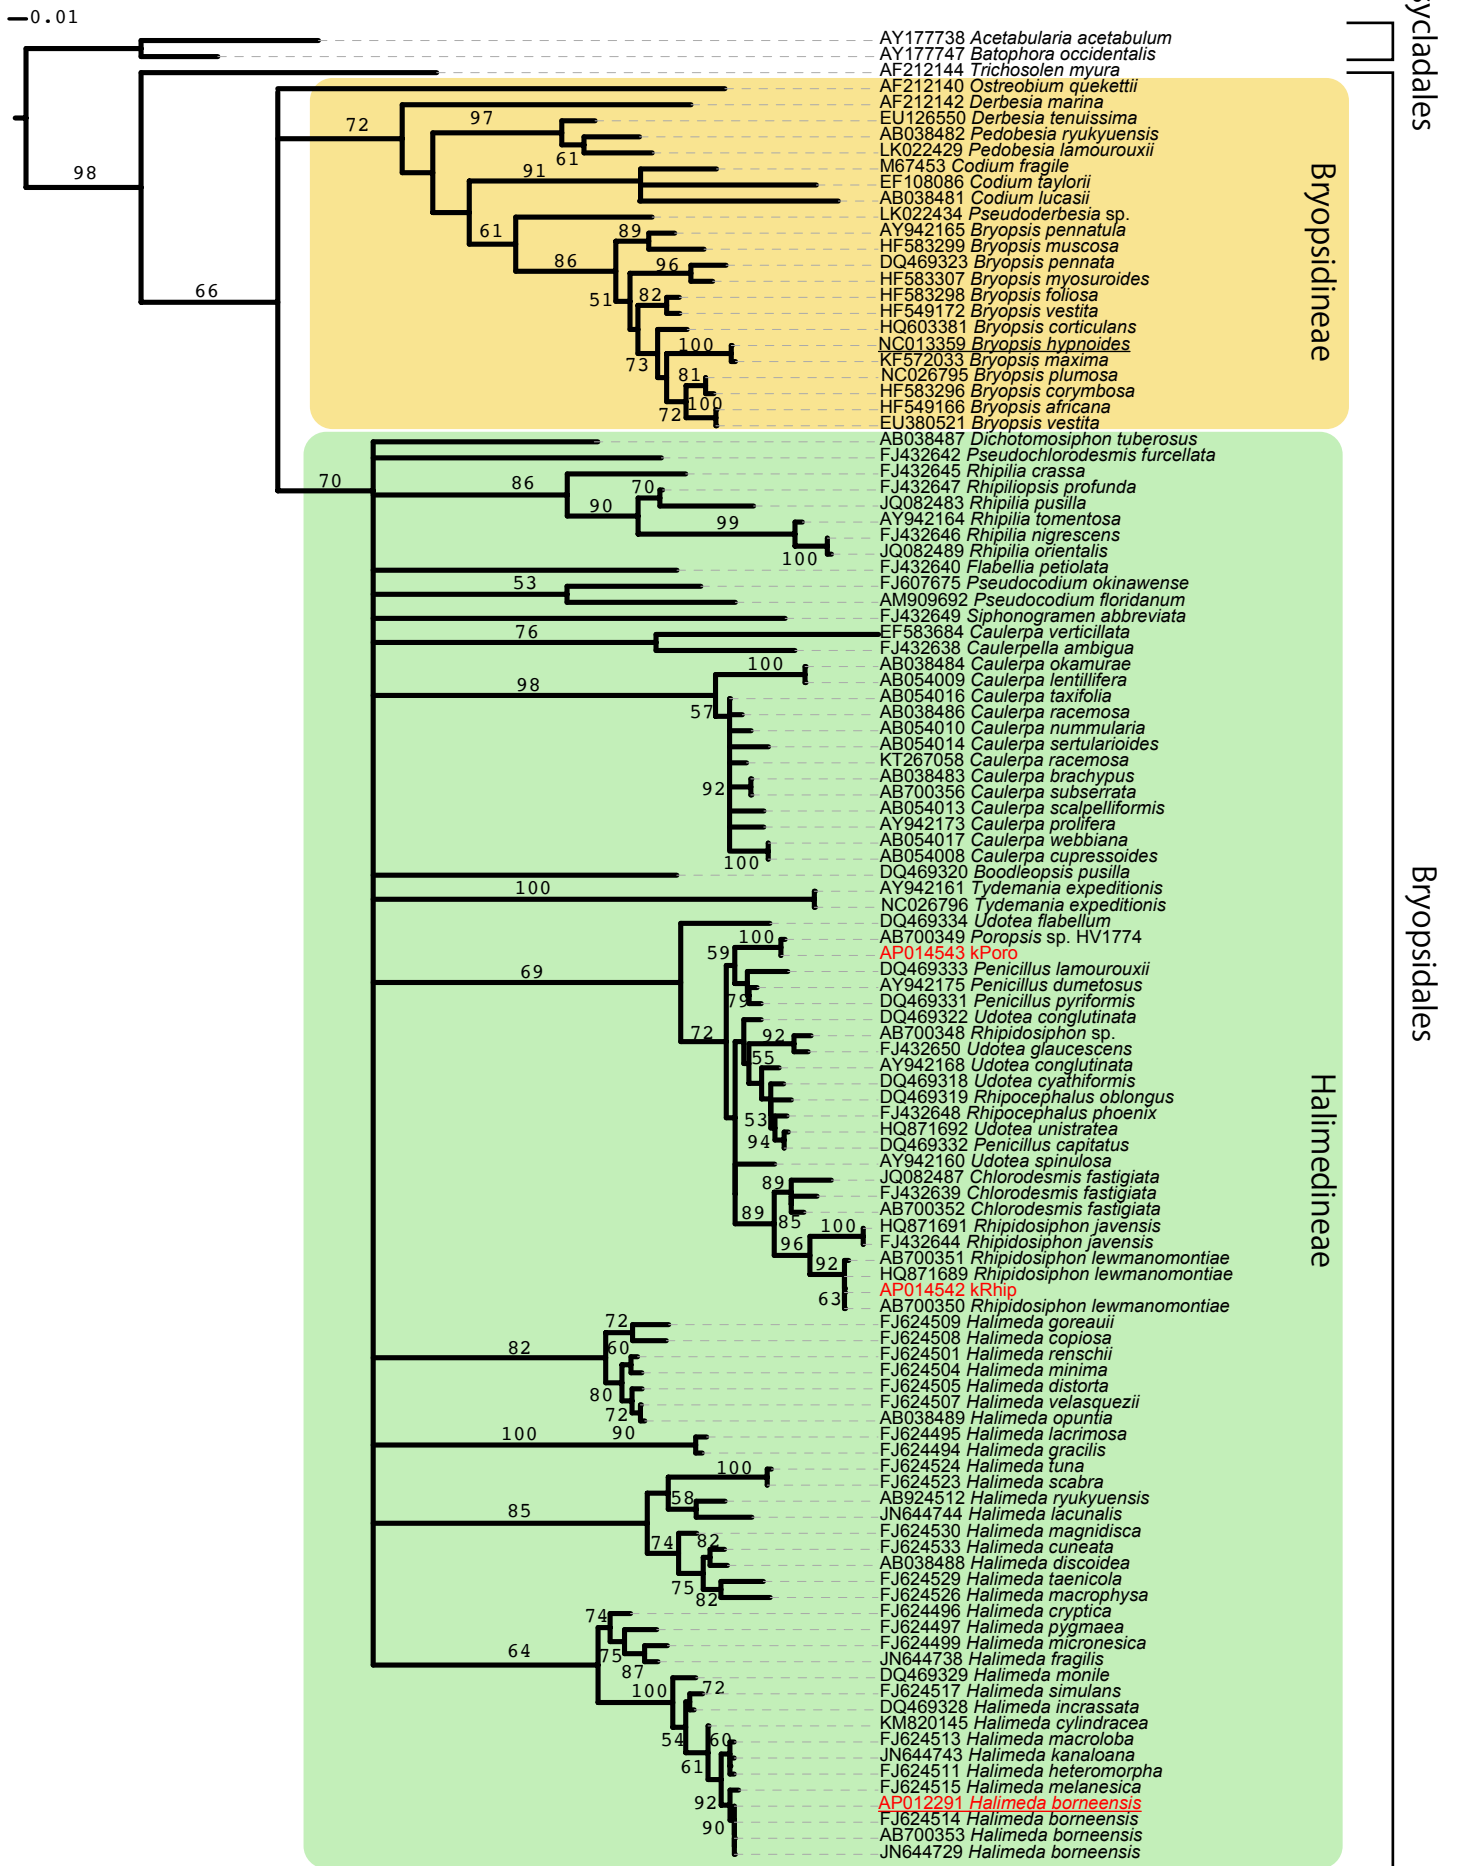

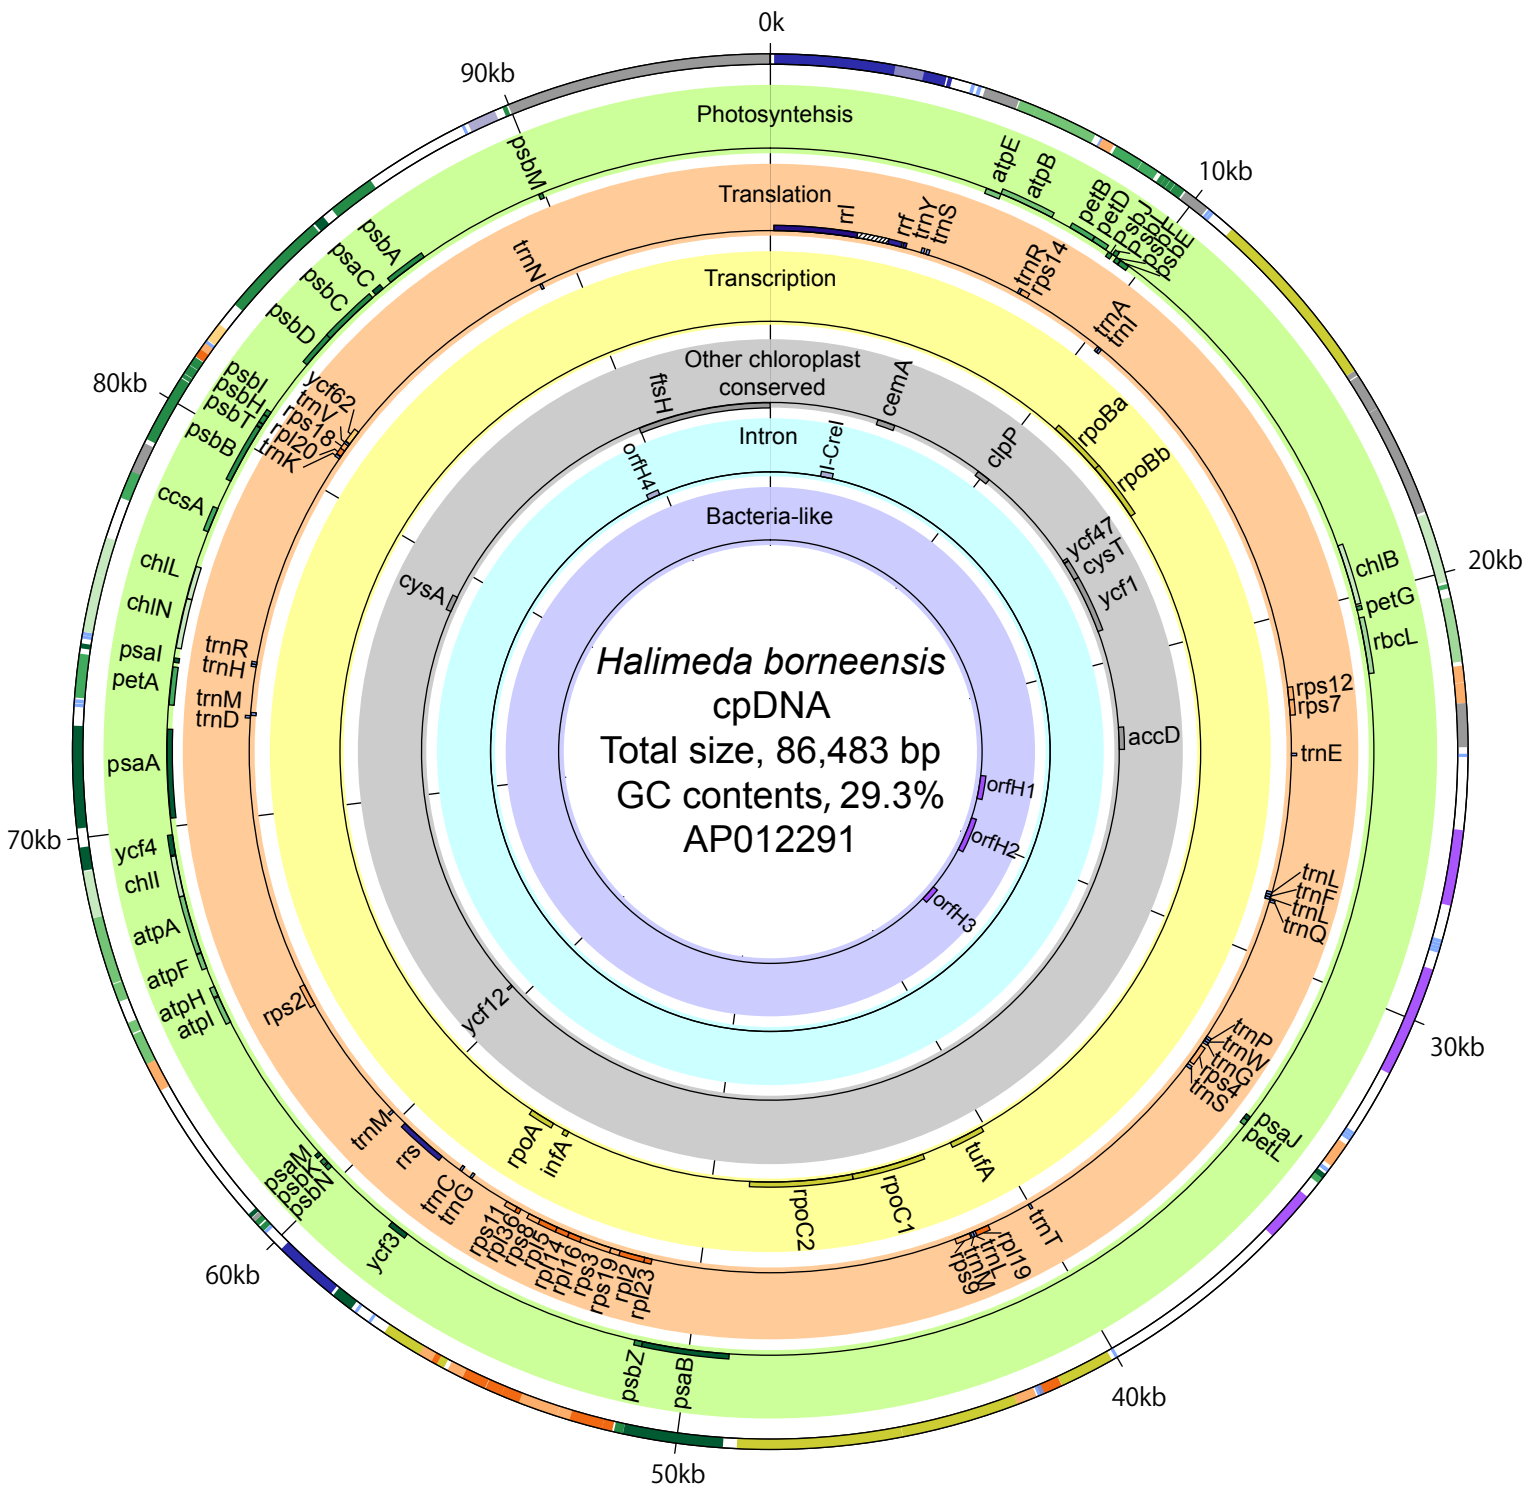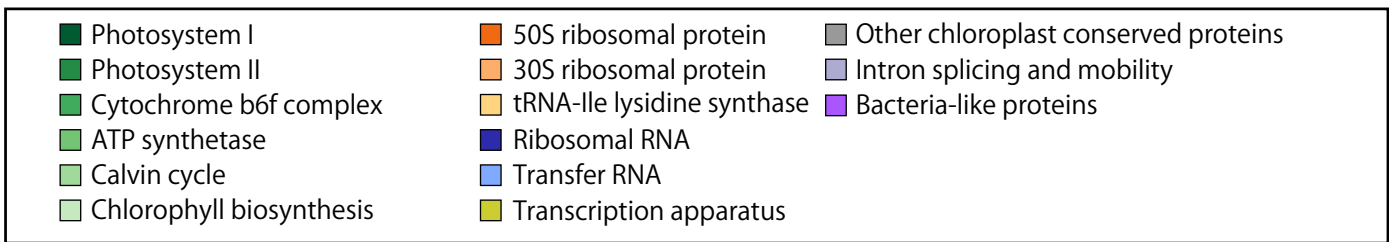

**Supplementary Figure 6** Gene map of the *H. borneensis* chloroplast DNA.

Circles and colors are as in Supplementary Figure 2.

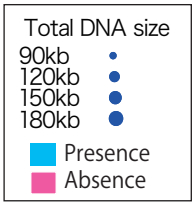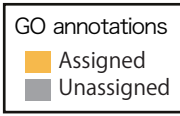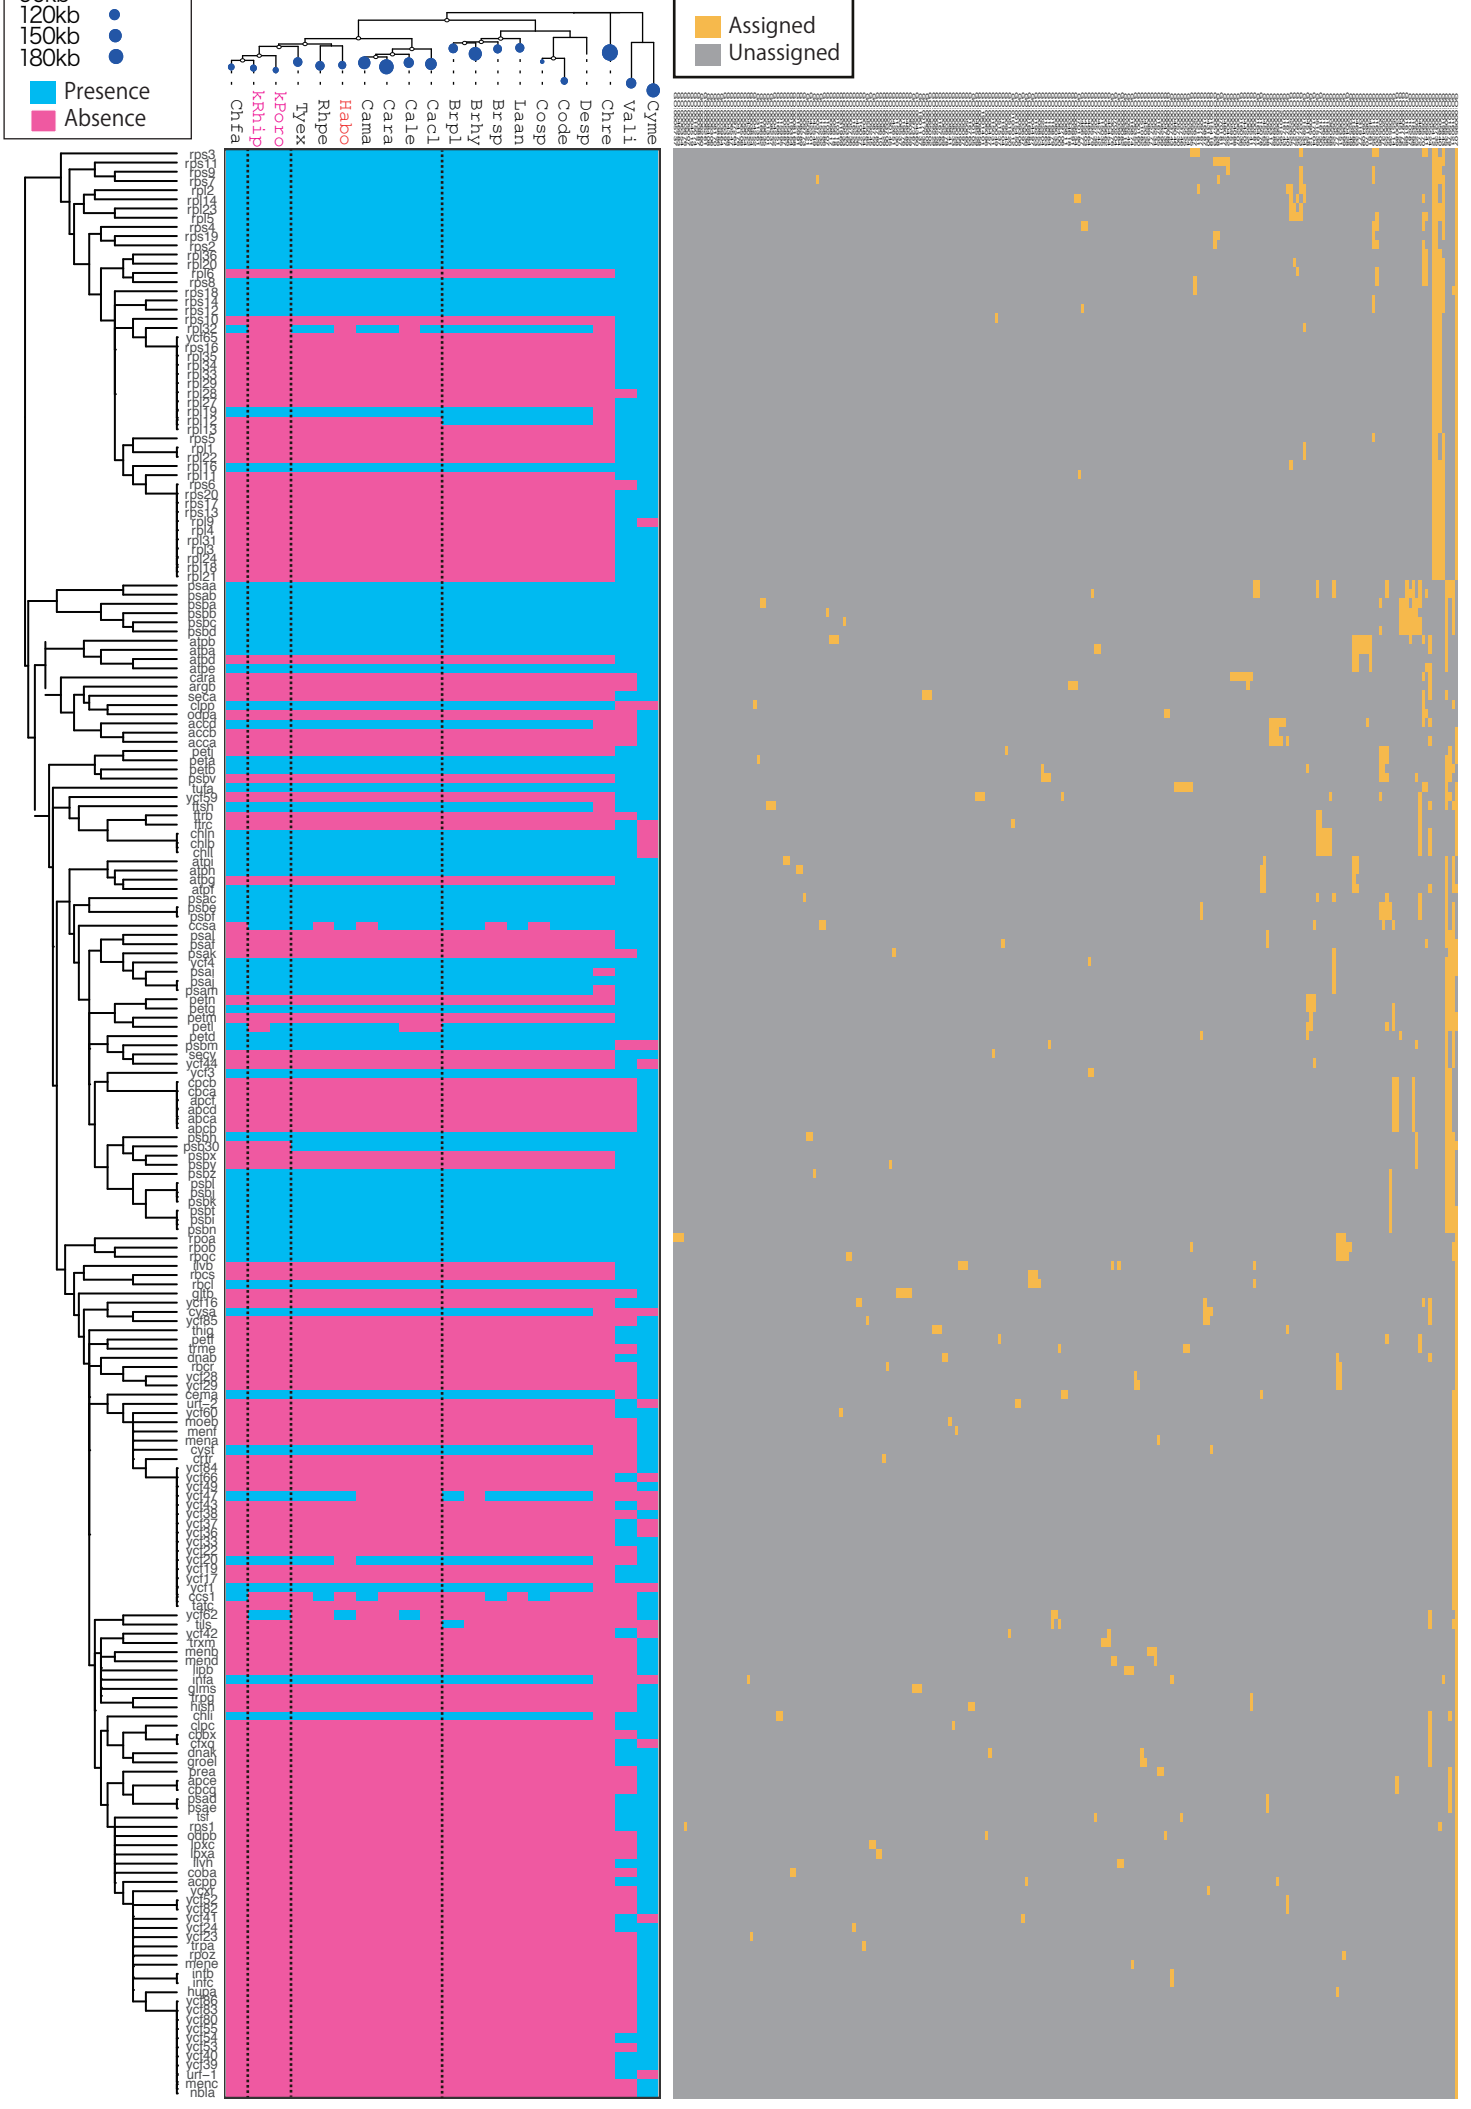

**Supplementary Figure 7** Gene compositions of 18 algal cpDNAs and *P. ocellatus* kpDNAs.

Presence (cyan) and Absence (Magenta) of the genes were visualized with the color tiles. The X-axis shows the species, and Y-axis shows the gene. Top tree shows the ML tree made by IQ-tree based on 51 conserved plastid genes (*ycf4*, *ycf3*, *tufa*, *rps9*, *rps8*, *rps7*, *rps4*, *rps3*, *rps2*, *rps19*, *rps18*, *rps14*, *rps12*, *rps11*, *rpoa*, *rpl5*, *rpl36*, *rpl23*, *rpl20*, *rpl2*, *rpl16*, *rpl14*, *rbcL*, *psbZ*, *psbT*, *psbN*, *psbL*, *psbK*, *psbJ*, *psbI*, *psbH*, *psbF*, *psbE*, *psbD*, *psbC*, *psbB*, *psbA*, *psaJ*, *psaC*, *psaB*, *psaA*, *petG*, *petD*, *petB*, *petA*, *atpI*, *atpH*, *atpF*, *atpE*, *atpB*, *atpA*, 9882 amino acid positions). Left side genes were clustered base on the GO annotation of each gene. GO annotations were described on the right-side boxes.

Raw data, [10.6084/m9.figshare.12311990](https://doi.org/10.6084/m9.figshare.12311990).



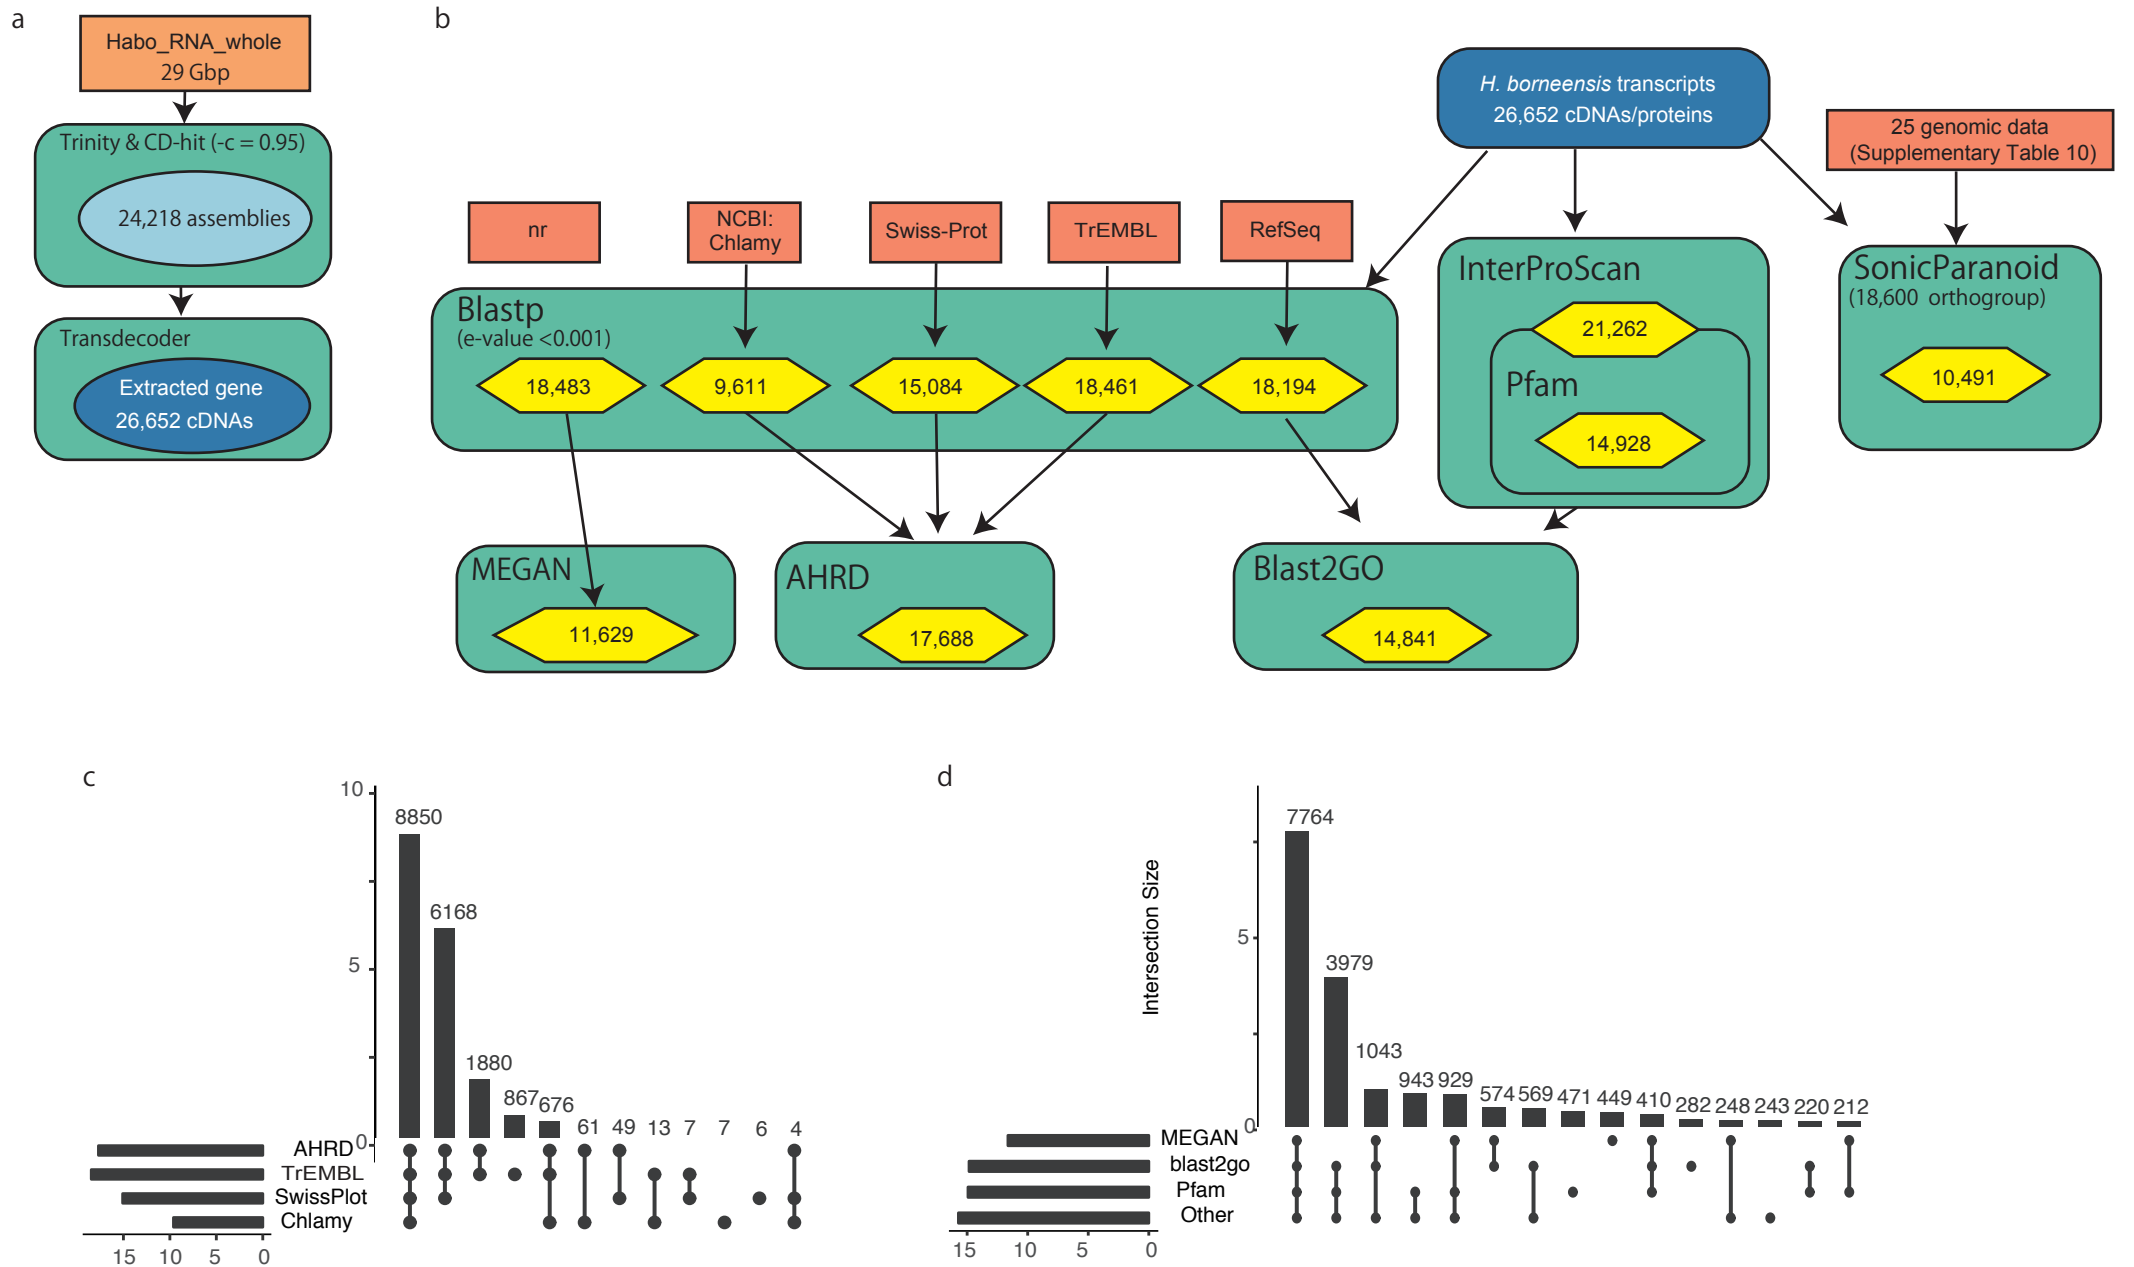

**Supplementary Figure 8** Annotation procedure of *H. borneensis* transcripts

**a** *De novo* transcripts assembling procedure. **b** Annotation procedure of the constructed transcripts. Dark blue = Submitted *H. borneensis* transcripts for DDBJ. Light red = Reference data. Aquamarine = annotation method (for detail, see material and methods). Yellow = annotated gene number for each step.

**c-b** Upset plot of annotated gene number for each annotation step. We deposited detailed annotation data about the kleptoplasts/chloroplast-encoded genes and *H. borneensis* transcripts (DOI 10.6084/m9.figshare.12316163, 10.6084/m9.figshare.12316283) in FigShare.

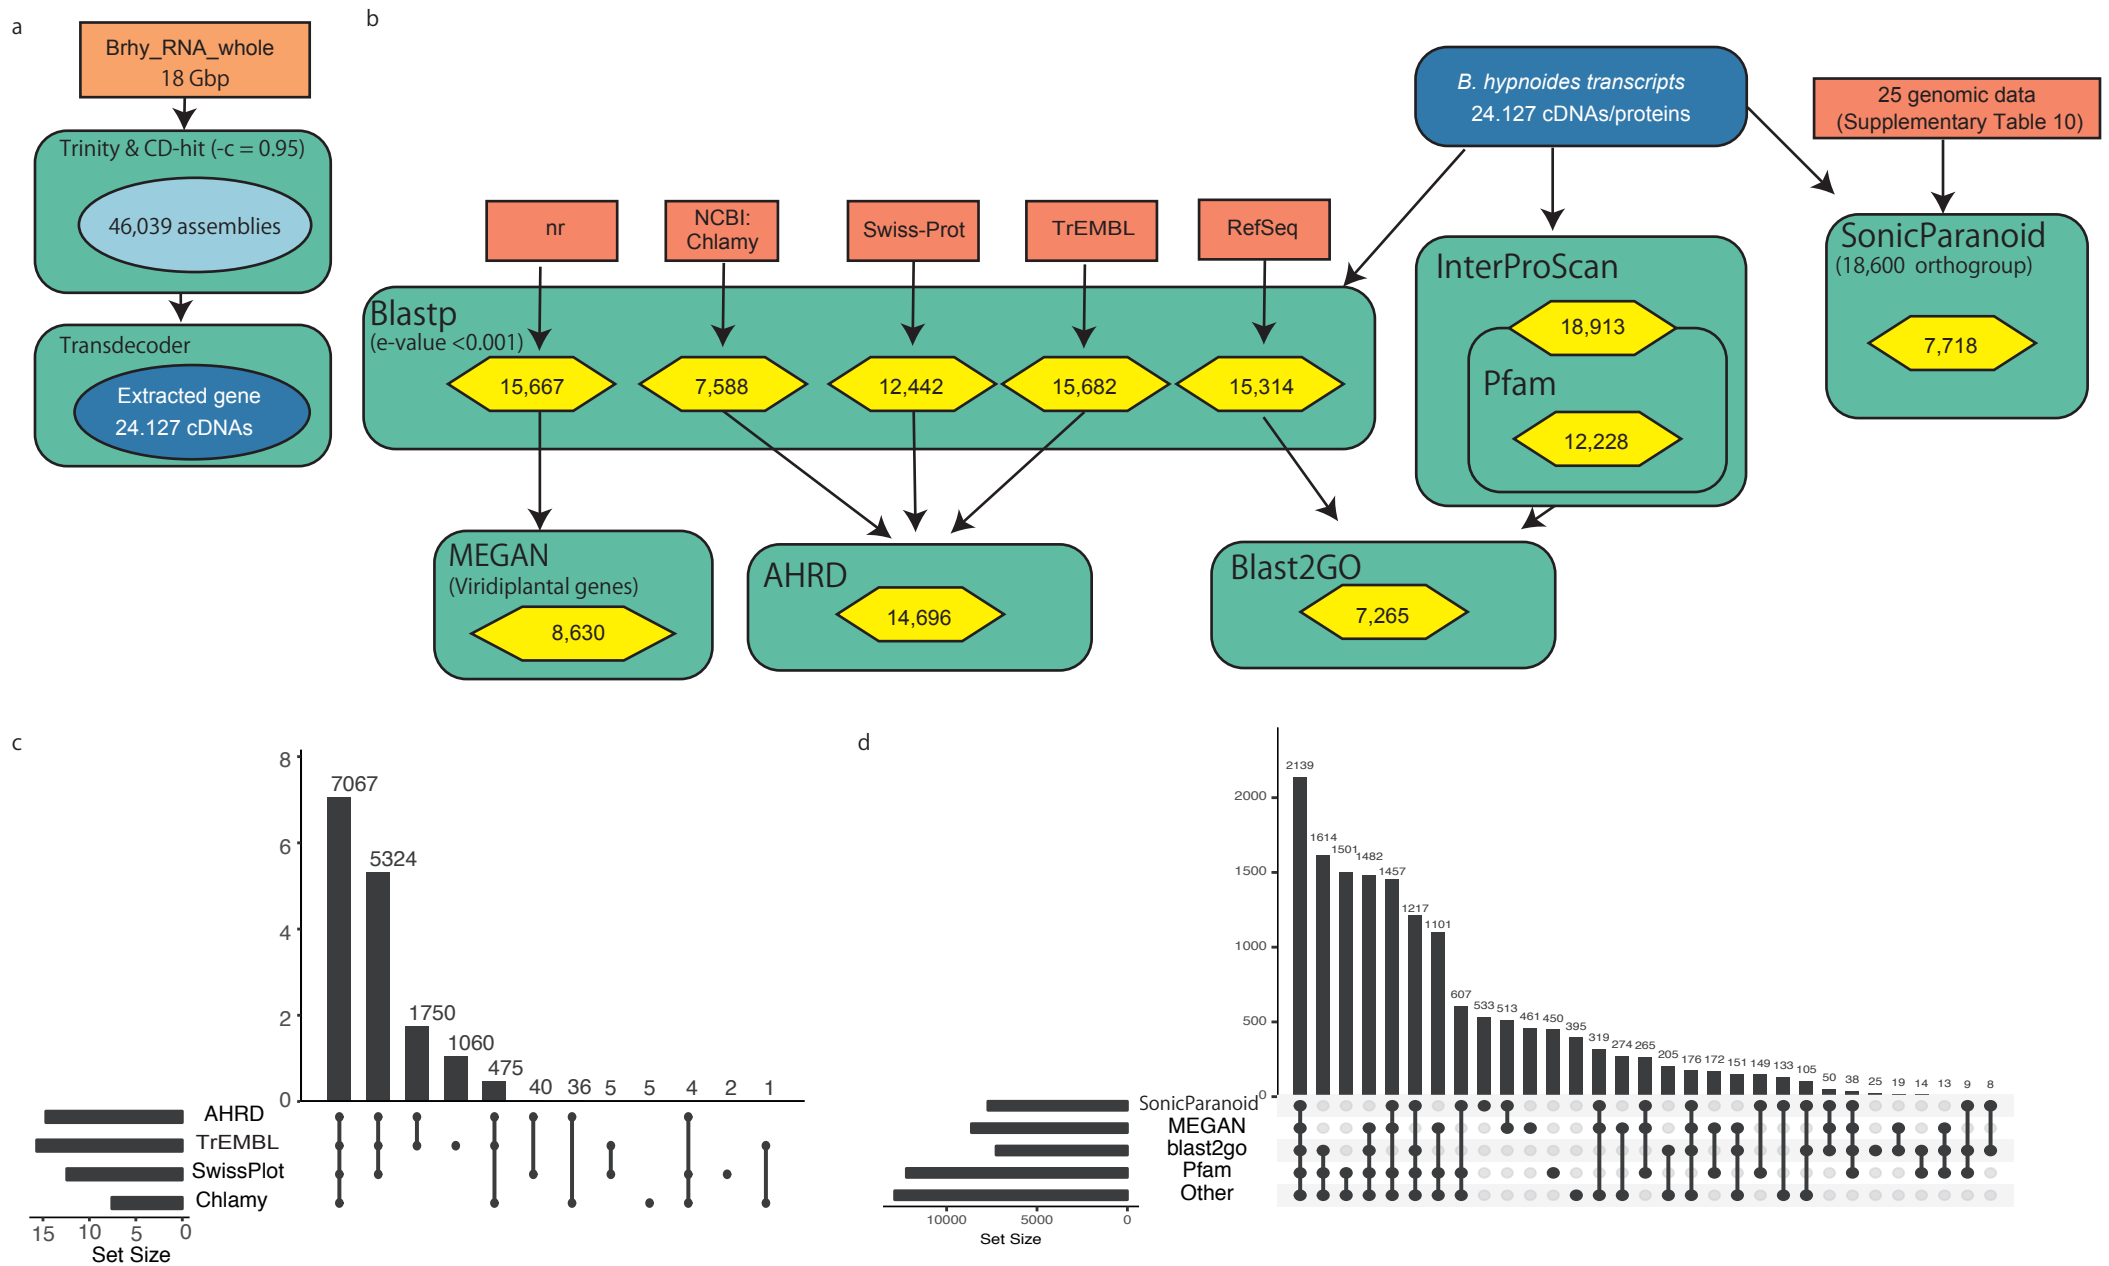

**Supplementary Figure 9** Annotation procedure of *B. hypnoides* transcripts.

Colors and boxes are as in Supplementary Figure 8. Annotations of the obtained genes, DOI 10.6084/m9.figshare.12316868.

a

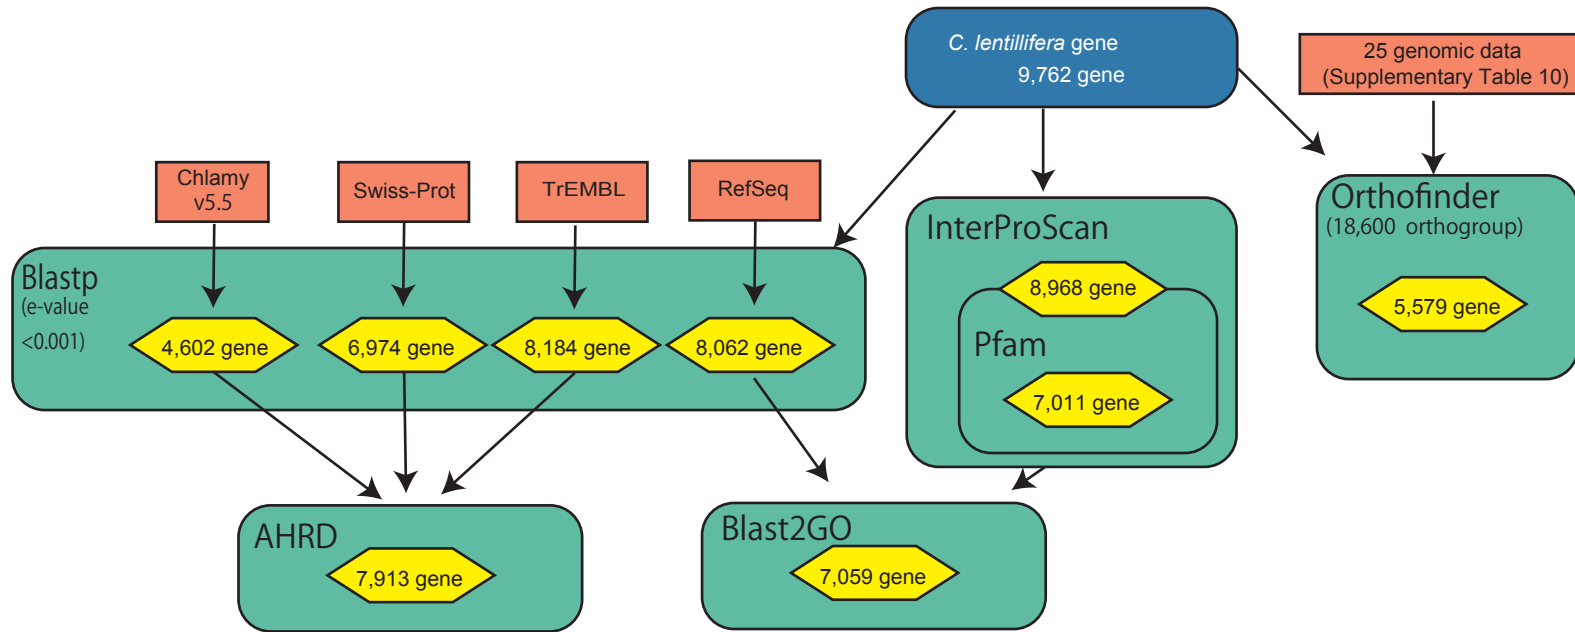

**Supplementary Figure 10** Annotation procedure of *C. lentillifera*.

Colors and boxes are as in Supplementary Figure 8. Annotations of the obtained genes, DOI 10.6084\_m9.figshare.12316895.

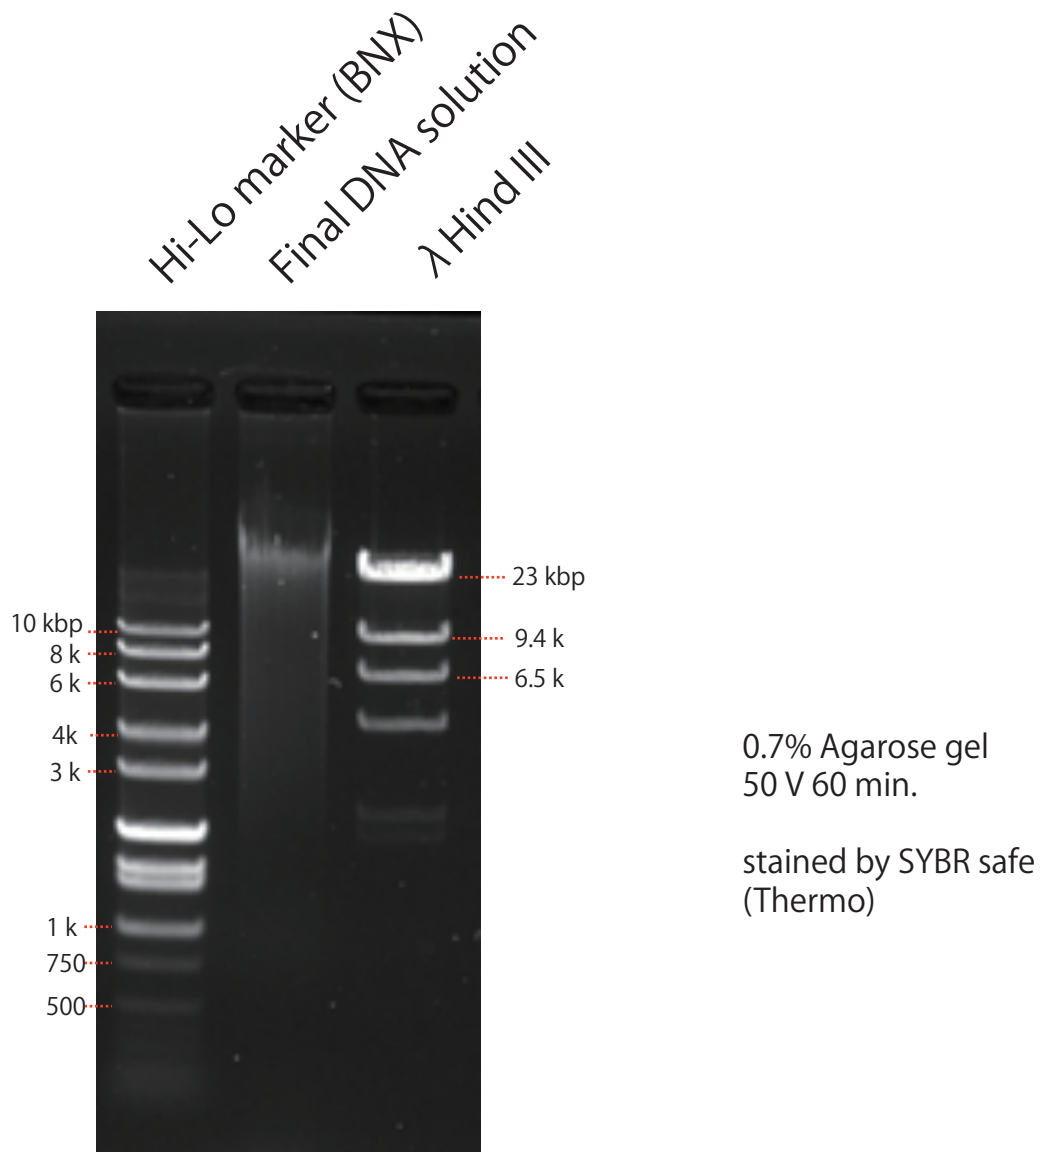

**Supplementary Figure 11** Agarose gel image displaying extracted *P. ocellatus* DNA for the nuclear genome sequencing and two kinds of fragment size markers.

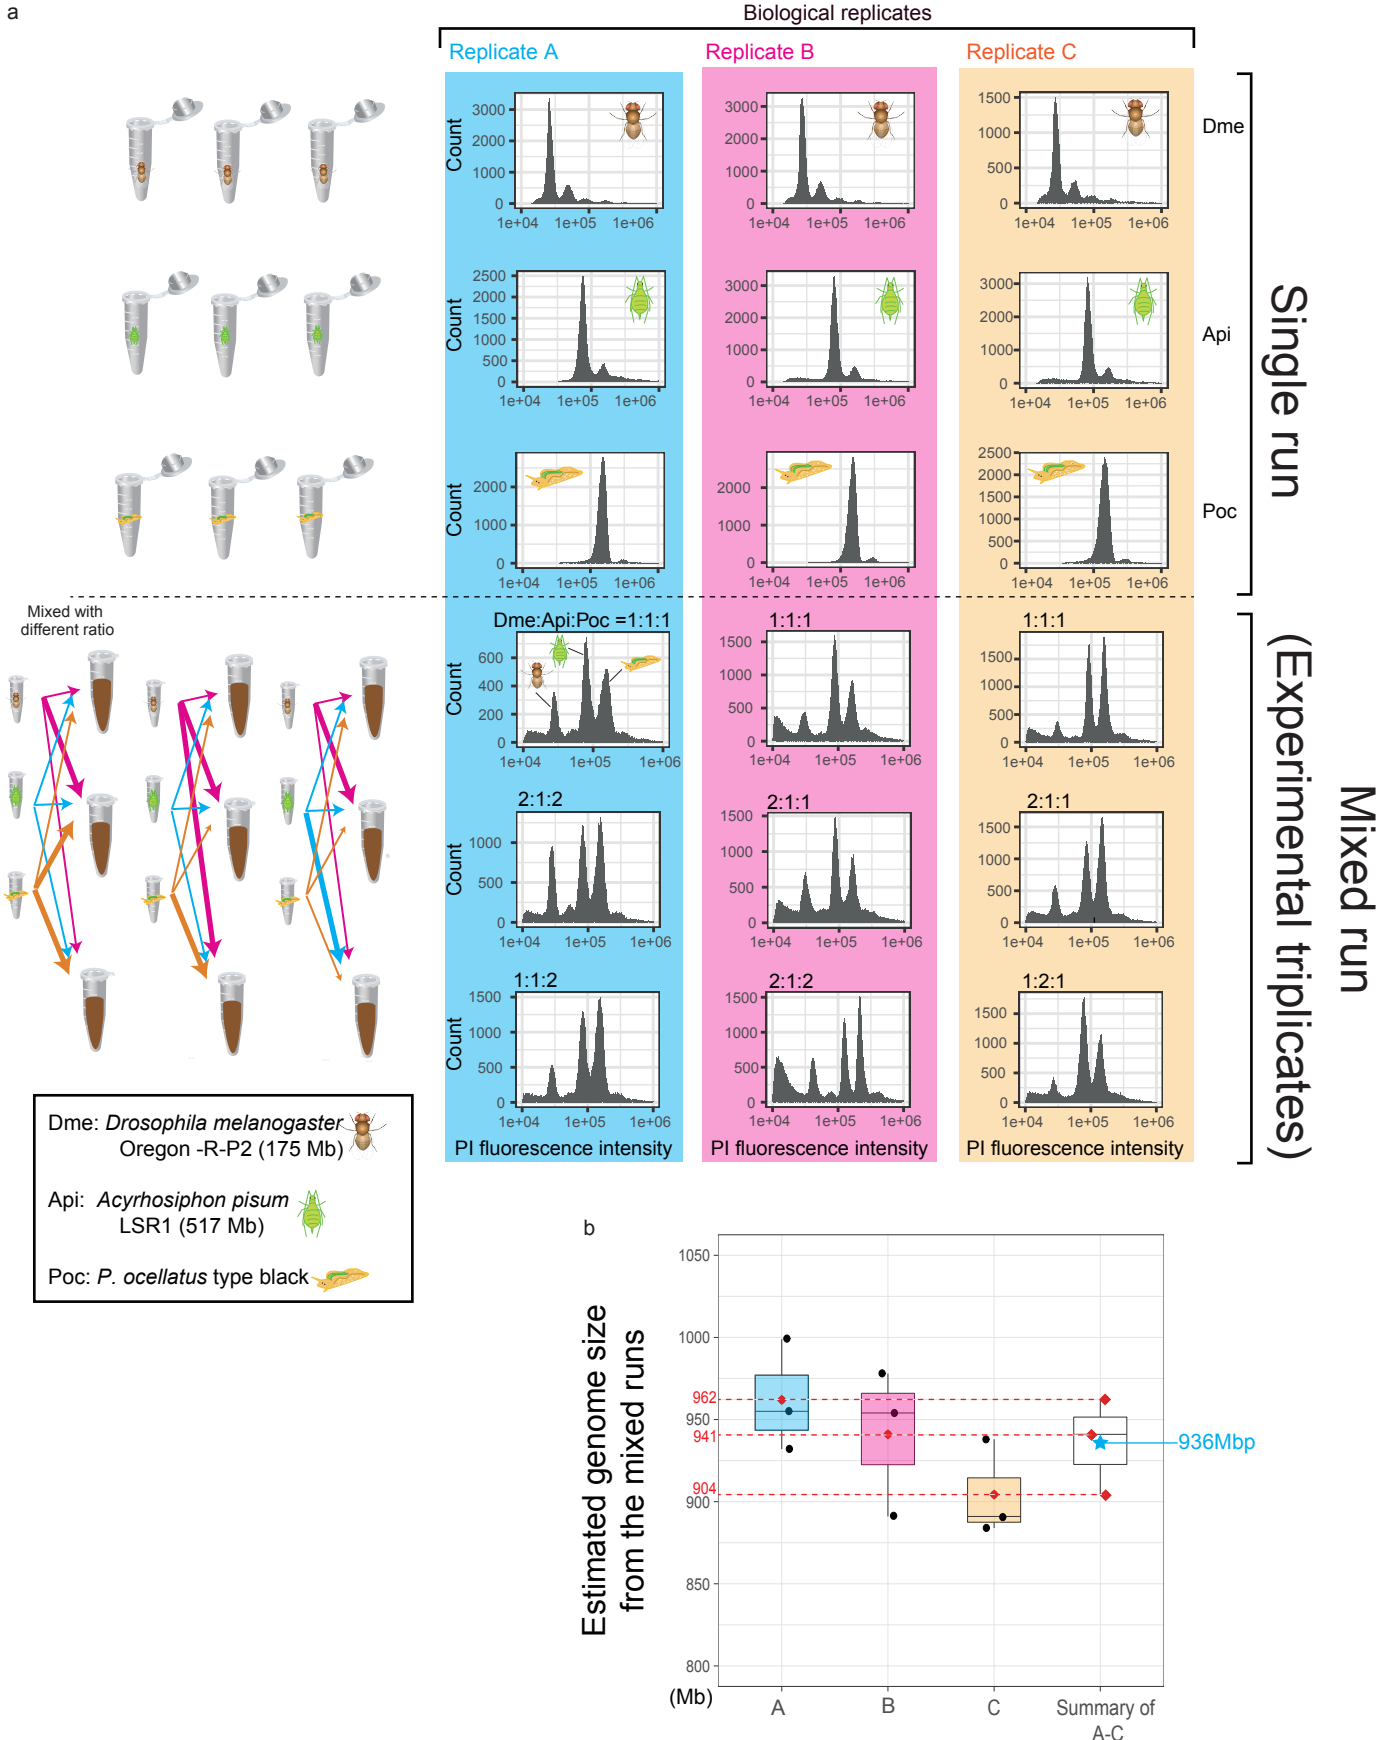

**Supplementary Figure 12** *P. ocellatus* genome size estimation with flow cytometry.

**a** Histograms showing the fluorescence peaks of the analyzed nuclei (x-axis) and count of the nuclei (y-axis). Analyzed species were represented with pictograms and abbreviations as in the left bottom box. Each nuclei suspension was analyzed for each species to confirm that the noiseless peaks (particle) are given. Then, three suspensions from different species were mixed with the ratio described on the left shoulder of each histogram to distinguish the peak derived from each species. **b** box-plot of predicted genomic size from the mixed runs of *P. ocellatus* with other genome size standards. Black dot = Predicted PoB genome size from each experimental triplicate. Red diamond shows an averaged genome size of the experimental triplicates (estimated genome size for each biological triplicate). A blue star means an averaged genome size of the biological triplicate.

Single individual of *Plakobranchnus ocellatus* type black

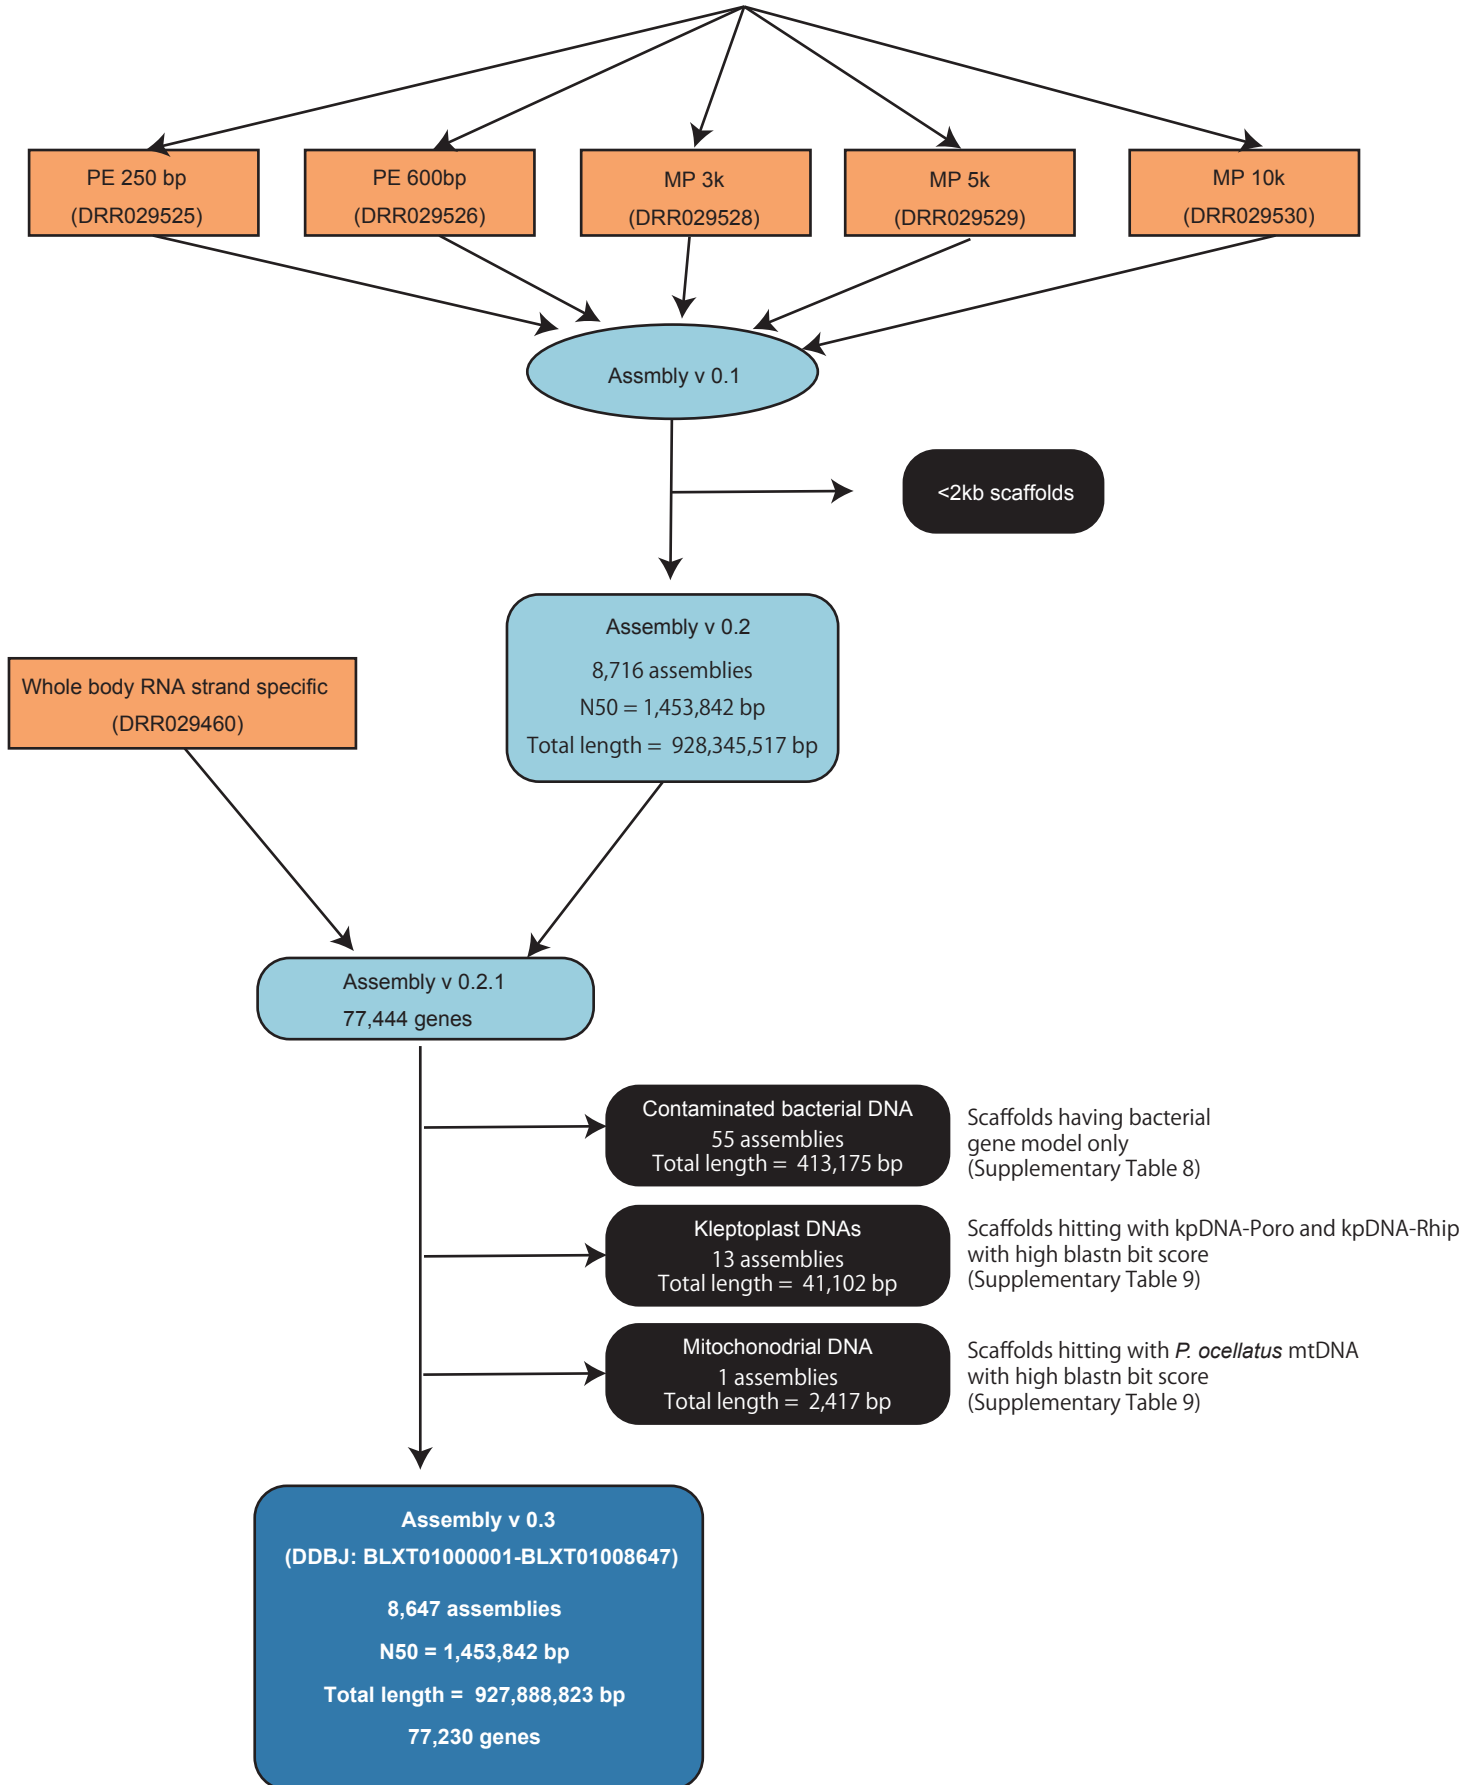

**Supplementary Figure 13** Genome assembling and gene modeling approach for the *P. ocellatus* genome analysis. Light orange = raw read data (for detail, see DOI 10.6084/m9.figshare.12301277). Light blue = intermediate assembly data. Dark blue = a final assembly for DDBJ submission. Black = eliminated assemblies.

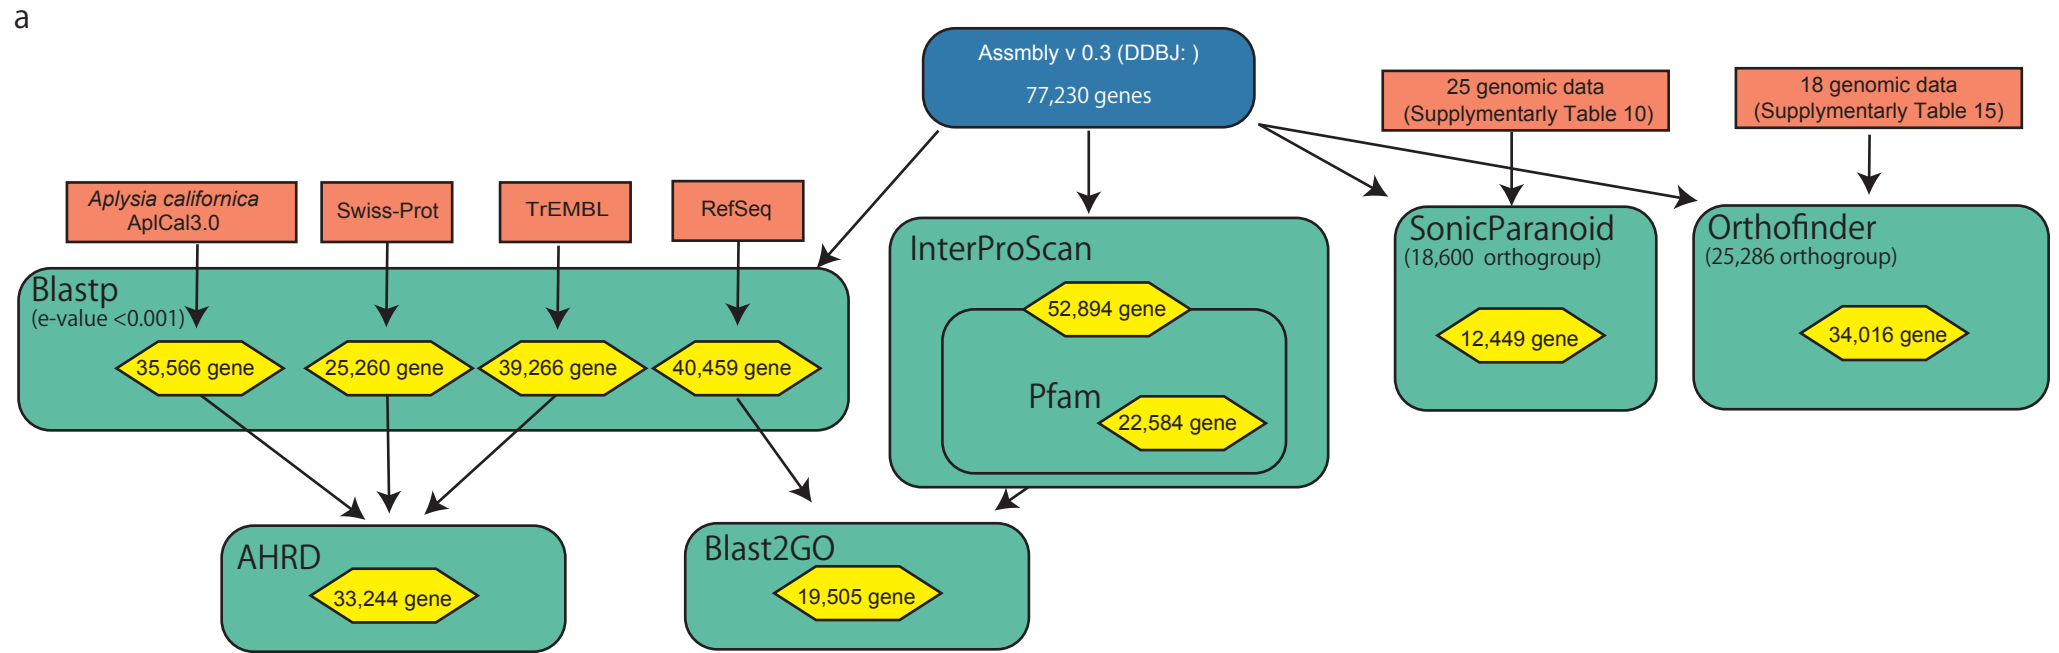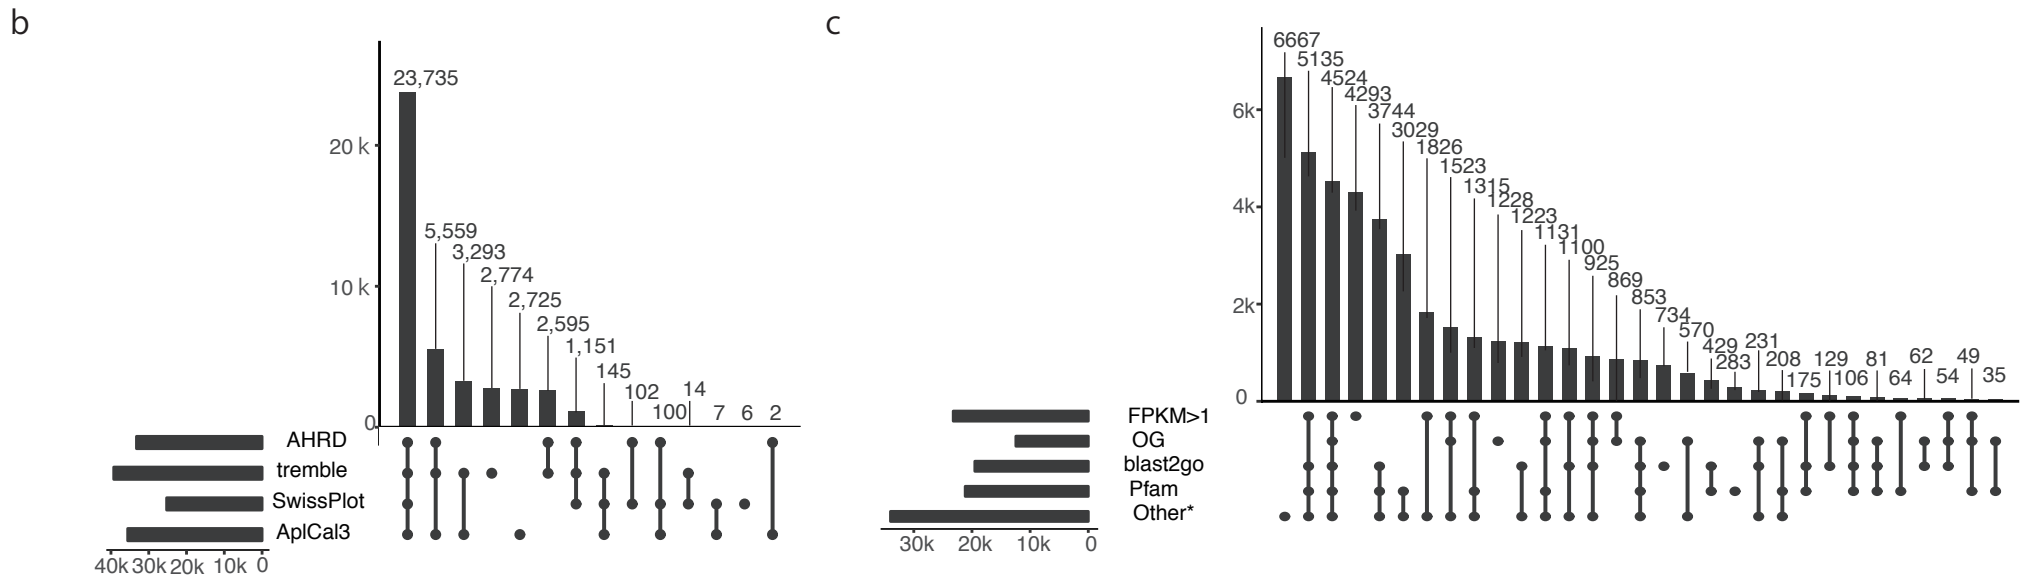

**Supplementary Figure 14** Annotation procedure for the genomic gene models of *P. ocellatus* type black.

Dark blue; *P. ocellatus* genome assembly for DDBJ submission. Light red; Reference data. Aquamarine; annotation method (for detail, see material and methods). Yellow; annotated *P. ocellatus* gene number. Other colors and boxes are as in Supplementary Figure 8.

Tree scale: 1

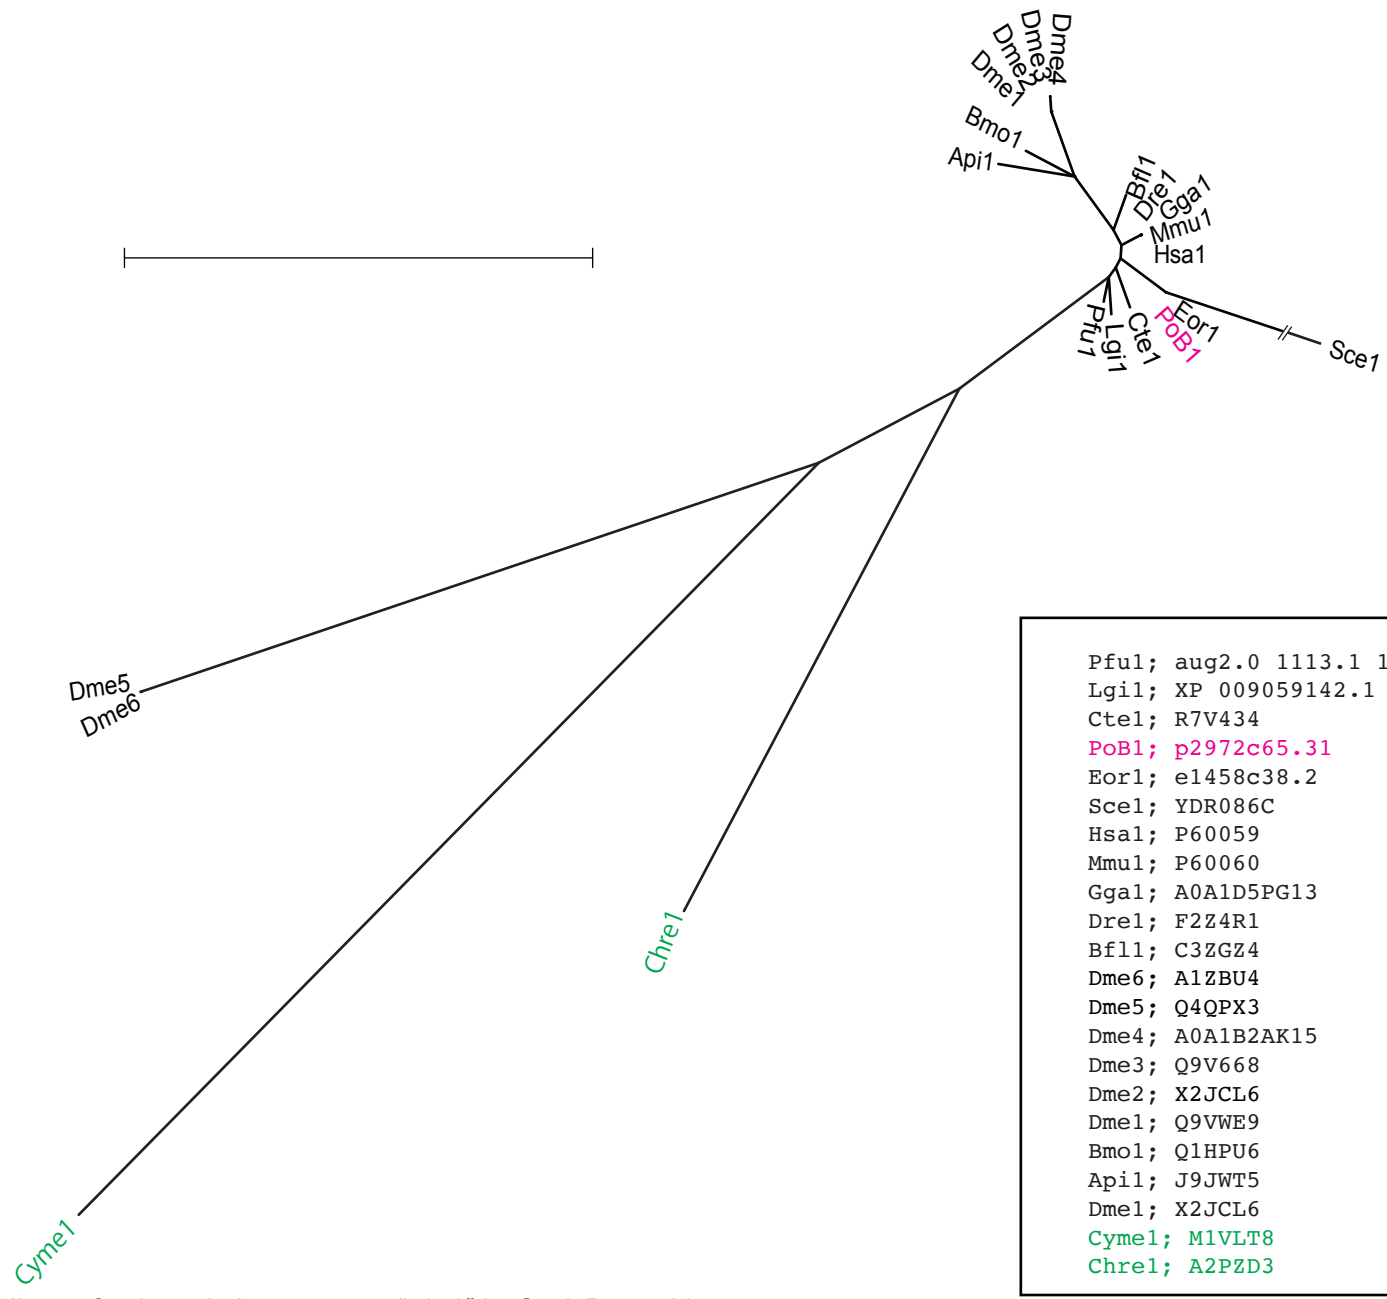

Supplementary Figure 15 ML tree for the orthologous group “4058” by SonicParanoid.

Green; algal gene. Magenta; *P. ocellatus* gene. Gene ID (INSDC ID, OIST Marine Genomics Unit database [https://marinegenomics.oist.jp], or our annotation ID) were described in a box. A PoB gene model, p2972c65.31, was annotated as “Chloroplast envelope” (GO0009941). However, the PoB gene formed a monophyletic clade with molluscan orthologs rather than algal gene, indicating this gene is molluscan origin (no HGT). Raw data, 10.6084/m9.figshare.12319001 and 10.6084/m9.figshare.12319424. Four genes (gene ID: p197c68.18, p234c64.89, p45387c41.1, and p466c59.83) annotated as “Chloroplast” (Fig. 4a and 10.6084/m9.figshare.12319532) showed no orthologous relationships with algal genes.



Tree scale: 0.1

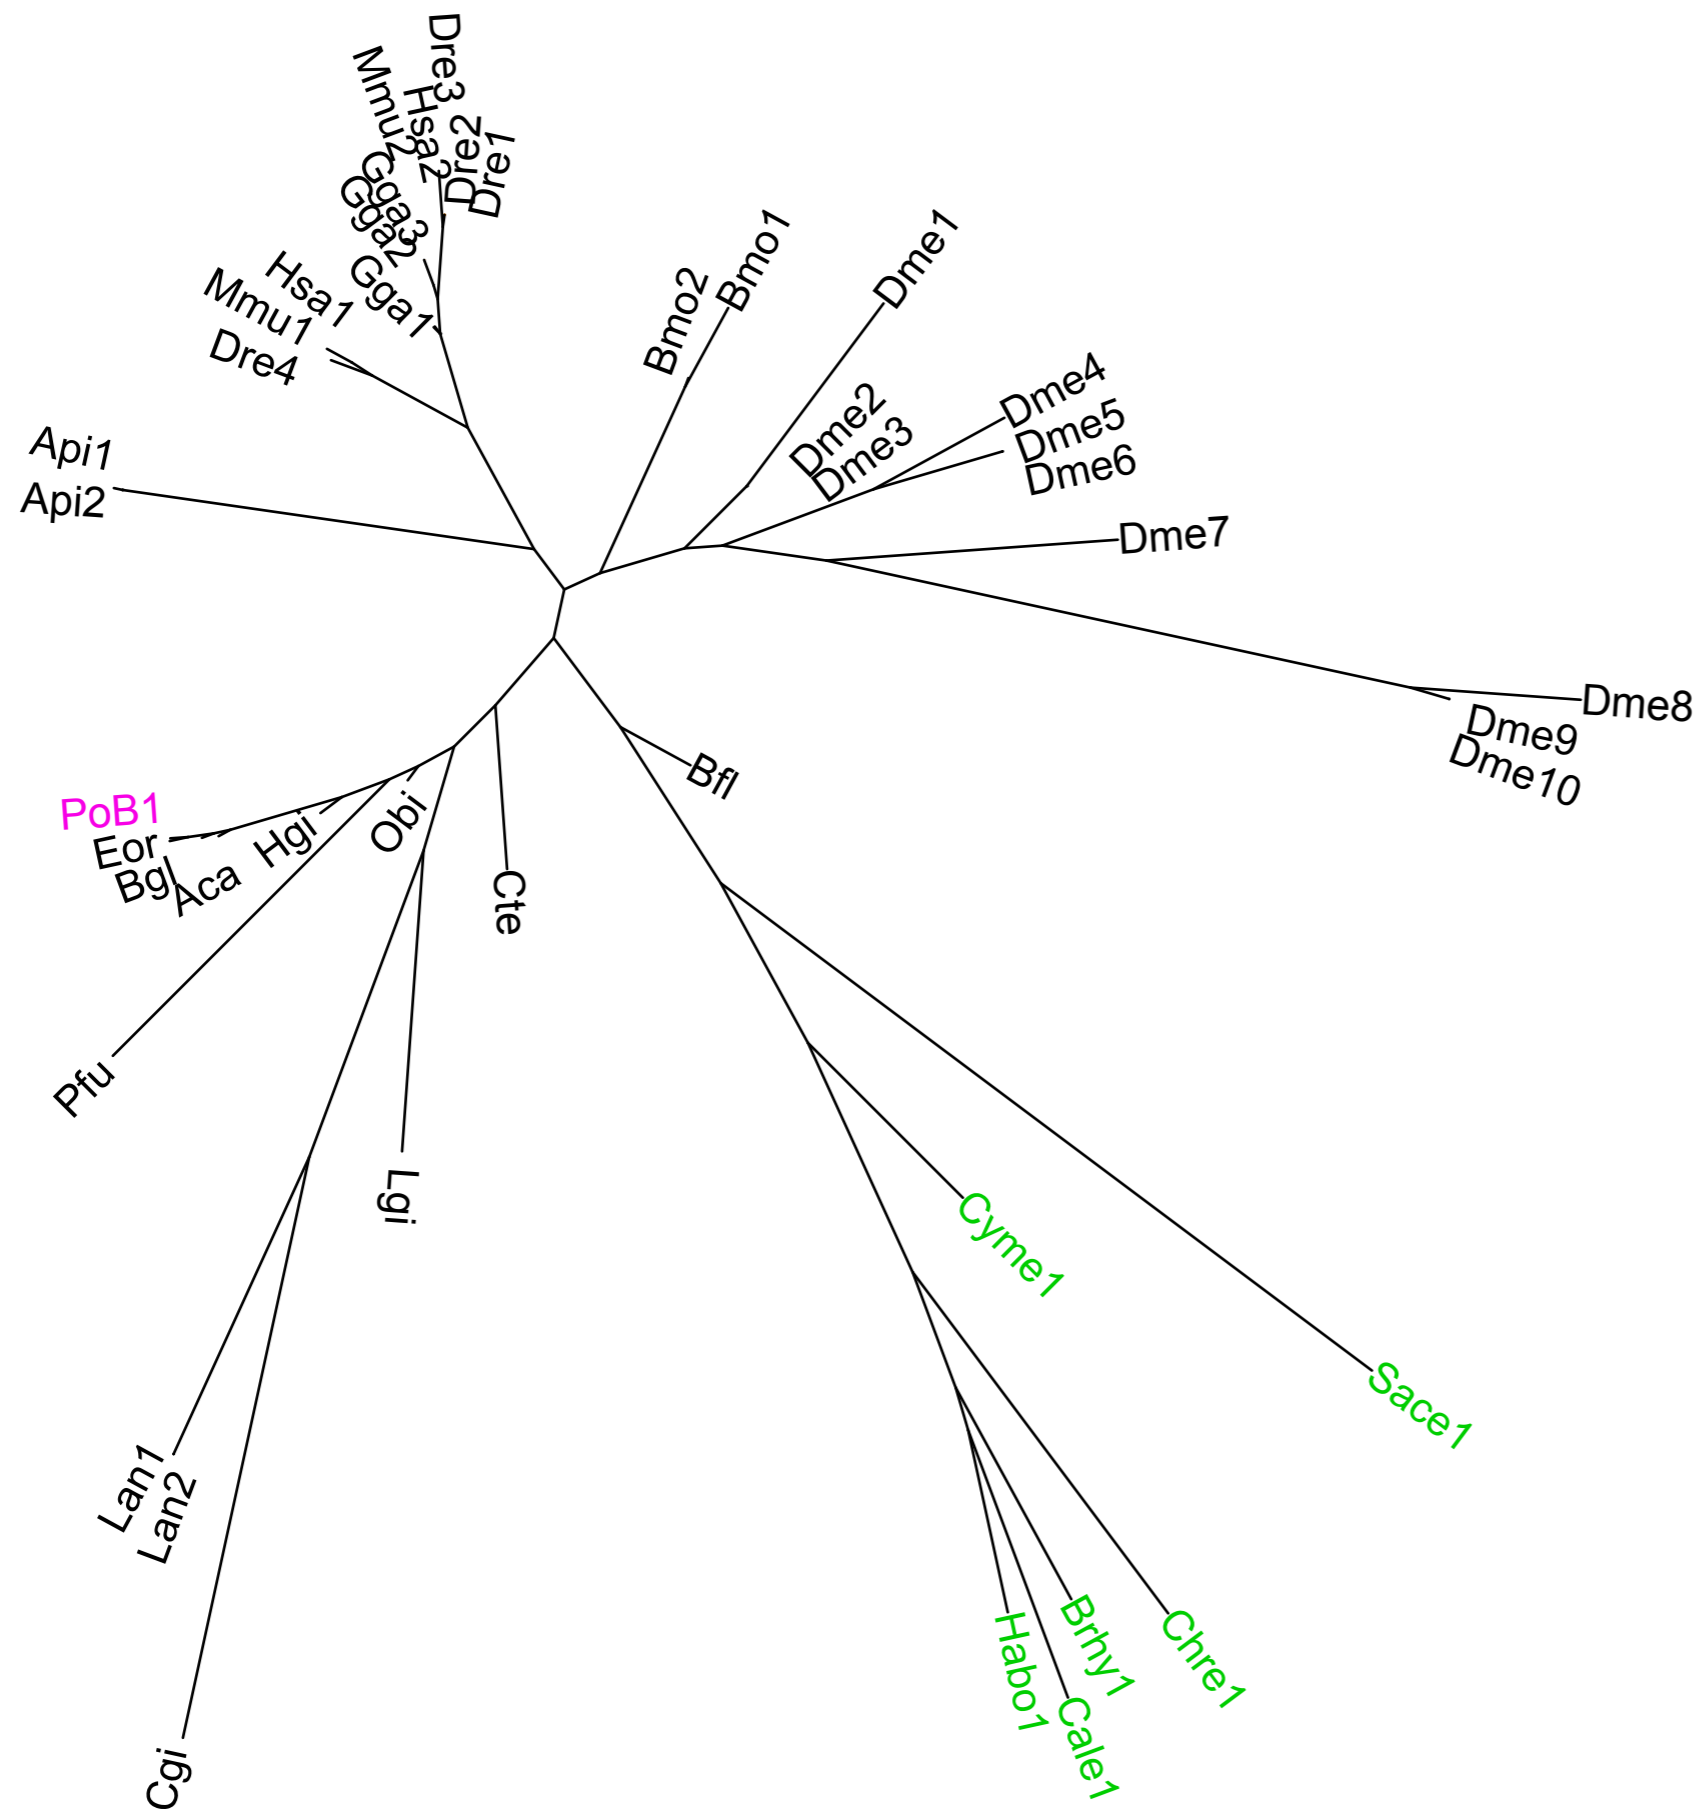

- Aca1; XP 012941103.1
- Api1; C4WT07
- Api2; J9JQB3
- Bgl1; XP 013088345.1
- Bmo1; H9IY82
- Bmo2; A1YM12
- Cgi1; XP 011427766.1
- Cte1; R7TKE3
- Dme1; Q6NMV8
- Dme2; E8NH43
- Dme3; Q7PLT4
- Dme4; Q9VJP1
- Dme5; Q8T903
- Dme6; Q9VRF6
- Dme7; Q9VNA0
- Dme8; Q9VN97
- Dme9; Q9VGA2
- Dme10; A0A0B4LH92
- Dre1; Q6NZZ0
- Dre2; F6NU65
- Dre3; A0A0R4ILL9
- Dre4; A8WHN3
- Eor1; evm.model.scaffold181 cov40.1
- Gga1; Q5ZJF5
- Gga2; A0A1D5PQM6
- Gga3; F1NM85Bf1; C3YLR4
- Hgi1; HDSC00251CG00080
- Hsa1; O60830
- Hsa2; Q99595
- Lan1; A0A1S3HSB6
- Lan2; A0A1S3I2S5
- Lgi1; XP 009053591.1
- Mmu1; Q9Z0V7
- Mmu2; Q9Z0V8
- Obi1; XP 014770271.1
- Pfu1; aug2.0 5.1 16677.t1
- PoB1; p503c65.126
- Brhy1; TRINITY DN11295 c1 g1 i1 m.23045
- Cale1; g1915.t1
- Chre1; A8I032
- Cyme1; tr M1VM69 M1VM69 CYAM1
- Habo1; c10815 g1 i1 m.18878
- Sace1; YJL143W

Supplementary Figure 16 ML tree for the orthologous group "2017" by SonicParanoid.

Colors are as in Supplementary Figure 15.

A PoB gene model, p503c65.126, was annotated as "Chloroplast envelope" (GO0009941). However, the PoB gene formed a monophyletic clade with molluscan orthologs rather than algal gene, indicating this gene is molluscan origin (no HGT).

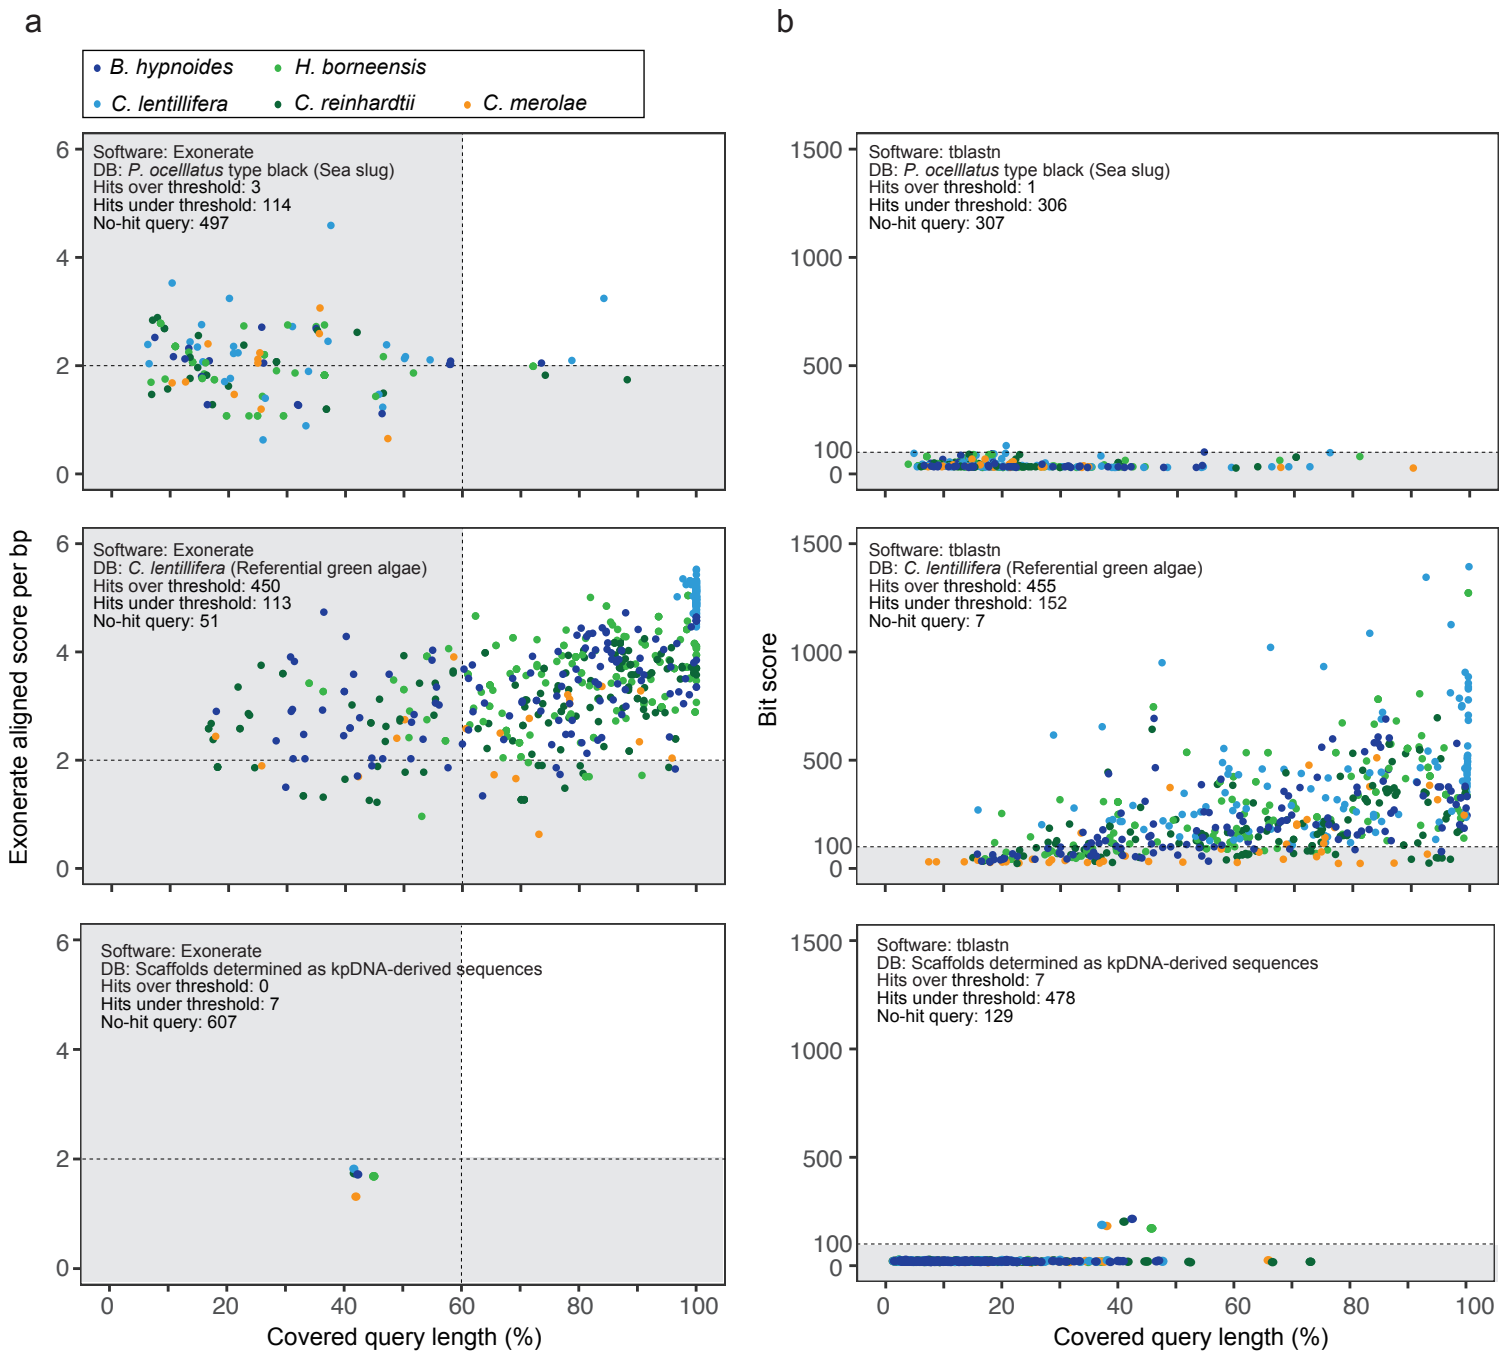

**Supplementary Figure 17** Summary of Exonerate and tblastn results.

**a** Scatter plot of Exonerate results. DB = *P. ocellatus* genome (Top plate), *C. lentillifera* genome (Middle plate), or kpDNA-derived scaffolds (see Supplementary Table 9) (Bottom plate). Query = algal A614 gene set. The top box shows the source algae of each query. Dashed lines are thresholds for the credible query hit (Covering over 60% of the query sequence, and over two normalized aligned scores for aligned length). Query hit statistics were described on the left shoulder of each plate. All seven hit queries on kpDNAs were algal *chlD* gene (encoding Magnesium-chelatase subunit ChID) resembling the kleptoplast-encoded *chlL* gene. **b** Scatter plot of tblastn results. DB = *P. ocellatus* genome (Top plate), *C. lentillifera* genome (Middle plate), or kpDNA-derived scaffolds (see, Supplementary Table 9). Query = algal A614 gene set. Dashed lines are thresholds (bit score = 100) for the credible query hit. All seven significant hit queries on the kpDNA-derived scaffolds were algal *chlD* gene (encoding Magnesium-chelatase subunit *chlD*) resembling the kleptoplast-encoded *chlL* gene (see Supplementary Table 20 and 10.6084/m9.figshare.12628709).

Raw data, DOI 10.6084/m9.figshare.12318920.

Tree scale: 1 

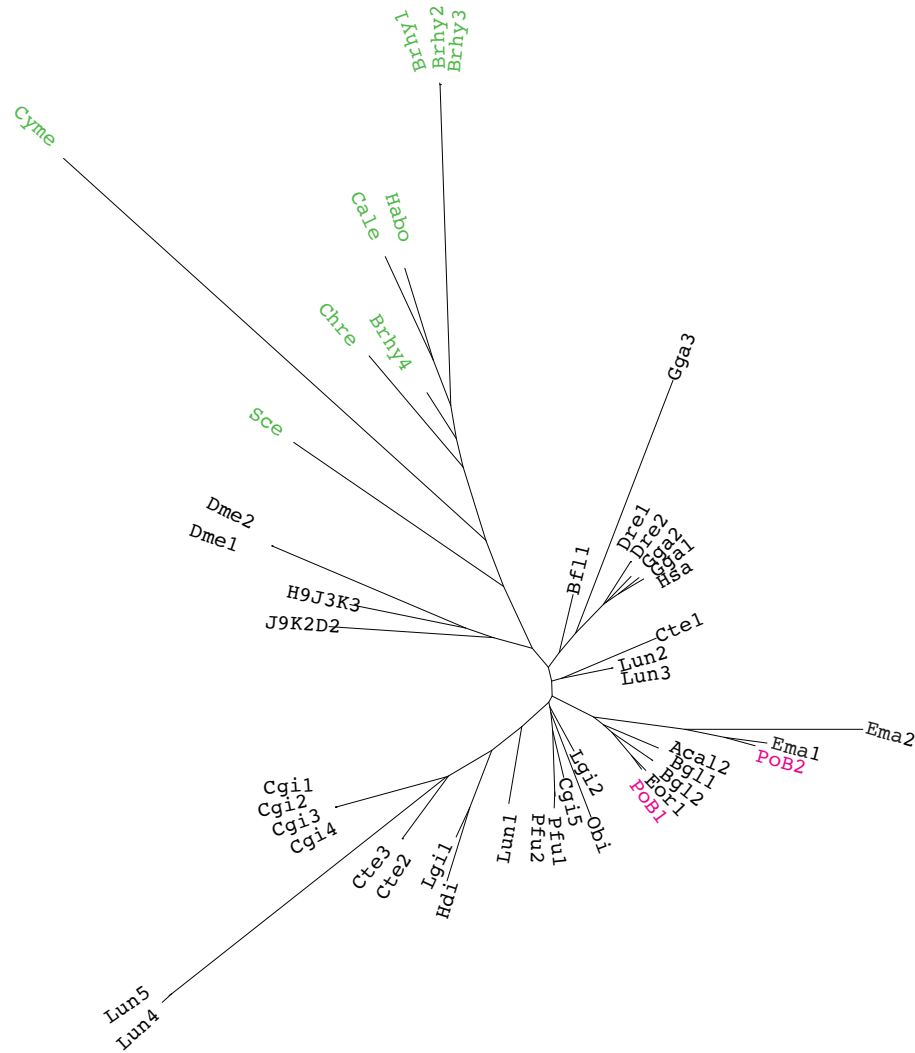

Api1; J9K2D2  
 Acal1; XP\_005099547.2  
 Acal2; XP\_012941160.1  
 Bfl1; C3YX59  
 Bgl1; XP\_013086066.1  
 Bgl2; XP\_013086068.1  
 Bmo; H9J3K3  
 Brhy1; TRINITY\_DN15712\_c0\_g2\_i1\_m.25540  
 Brhy2; TRINITY\_DN15712\_c0\_g2\_i2\_m.25550  
 Brhy3; TRINITY\_DN15712\_c0\_g2\_i2\_m.25551  
 Brhy4; TRINITY\_DN15712\_c0\_g3\_i1\_m.25561  
 Cte1; R7TC54  
 Cte2; R7VEA1  
 Cte3; R7TRQ8  
 Cale; g2233.t1  
 Chre; A8IFY3  
 Cgi1; XP\_011433686.1  
 Cgi2; XP\_019924656.1  
 Cgi3; XP\_019924657.1  
 Cgi4; XP\_019924658.1  
 Cgi5; XP\_019929326.1  
 Cyme; tr\_M1V583\_M1V583\_CYAM1  
 Dme1; Q95TG7  
 Dme2; A8DYB0  
 Ema1; e4271c37.7  
 Ema2; e4271c37.1  
 Habo; c12624\_g1\_i1\_m.52286  
 Hdi; HDSC49952CG00010  
 Lun1; A0A1S3H4V0  
 Lun2; A0A1S3H6C9  
 Lun3; A0A1S3IXZ2  
 Lun4; A0A1S3H7D6  
 Lun5; A0A1S3H4I4  
 Lgi1; XP\_009045458.1  
 Lgi2; XP\_009045461.1  
 Obi; XP\_014789895.1  
 PoB1; p258757c71.61  
 PoB2; p258757c71.57  
 Sce; YLR106C  
 Dre1; E7F4D6  
 Dre2; F1QMM1  
 Gga1; E1C4X6  
 Gga2; A0A1D5P4E1  
 Gga3; A0A1D5PNK8  
 Hsa; Q9NU22  
 Pfu1; aug2.0\_176.1\_20367.t1  
 Pfu2; aug2.0\_10247.1\_26360.t1

**Supplementary Figure 18** ML tree for the orthologous group 65 by SonicParanoid.

Colors are as in Supplementary Figure 15.

Raw data, DOI 10.6084/m9.figshare.12318977 and 10.6084/m9.figshare.12319532.

Tree scale: 0.1

# Phosphoglycerate kinase

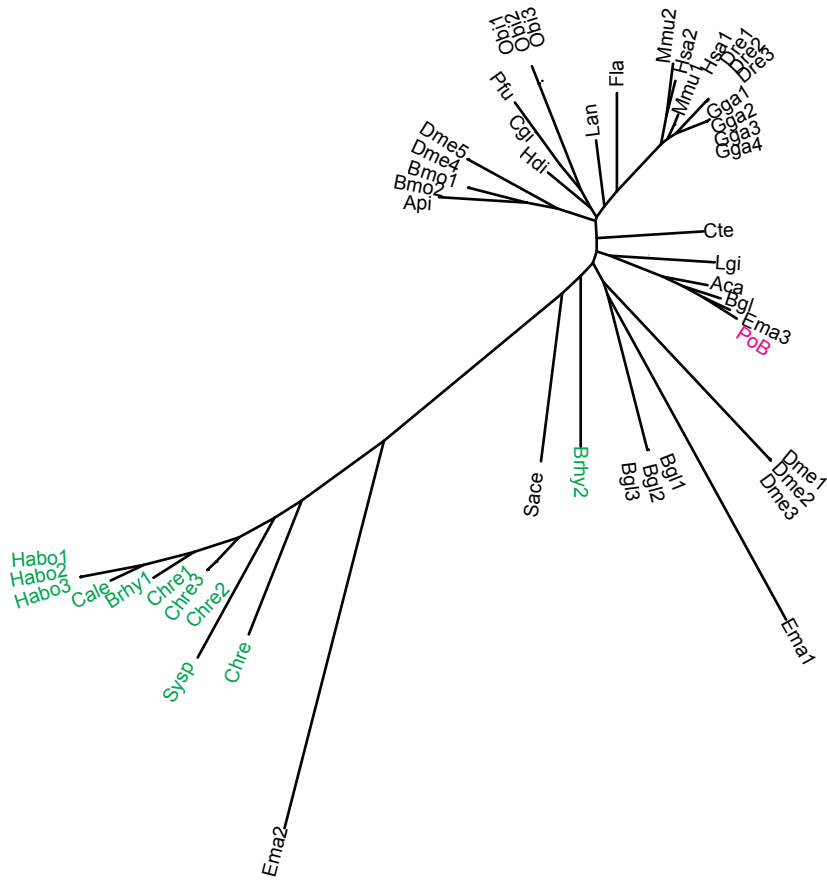

|                                      |                                         |
|--------------------------------------|-----------------------------------------|
| Aca; XP 012936693.1                  | Gga4; F1NU17                            |
| Api; J9K4W4                          | Hdi; HDSC00324CG00210                   |
| Bgl1; XP 013066033.1                 | Hsa1; P00558                            |
| Bgl11; XP 013061476.1                | Hsa2; P07205                            |
| Bgl12; XP 013061475.1                | Lan; A0A1S3HH77                         |
| Bgl13; XP 013061477.1                | Lgi; XP 009047142.1                     |
| Bmo1; H9JDT4                         | Mmu1; P09411                            |
| Bmo2; E5EVW6                         | Mmu2; P09041                            |
| Cgi; XP 011419255.1                  | Obi1; XP 014774198.1                    |
| Cte; R7TJM0                          | Obi2; XP 014774182.1                    |
| Dme1; Q8T447                         | Obi3; XP 014774190.1                    |
| Dme2; B5RJA1                         | Pfu; aug2.0 329.1 30622.t1              |
| Dme3; Q9VQF4                         | PoB; p105c62.89                         |
| Dme4; Q01604                         |                                         |
| Dme5; M9PCE0                         |                                         |
| Dre1; F1QXV8                         | Brhy1; TRINITY DN35033 c0 g1 i1 m.48831 |
| Dre3; Q6P003                         | Brhy2; TRINITY DN36447 c0 g1 i1 m.33737 |
| Dre2; Q7ZV29                         | Chre; tr A0A125YSW1 A0A125YSW1 CYAM1    |
| Ema1; evm.model.scaffold44.20        | Chre1; Q548U3                           |
| Ema2; evm.model.scaffold69.33        | Chre2; P41758                           |
| Ema3; evm.model.scaffold3214 cov43.1 | Chre3; A8JC04                           |
| Fla; C3XW30                          | Cale; g2055.t1                          |
| Gga1; P51903                         | Habo1; c11923 g1 i3 m.33221             |
| Gga2; A0A1L1RXH1                     | Habo2; c11923 g1 i1 m.33202             |
| Gga3; A0A1D5NZW9                     | Habo3; c11923 g1 i2 m.33212             |
|                                      | Sace; YCR012W                           |
|                                      | Sysp; P74421 PGK SYNY3                  |

**Supplementary Figure 19** ML tree for the orthologous group 501 by SonicParanoid.

Colors are as in Supplementary Figure 15.

Raw data, DOI 10.6084/m9.figshare.12318977 and 10.6084/m9.figshare.12319532.

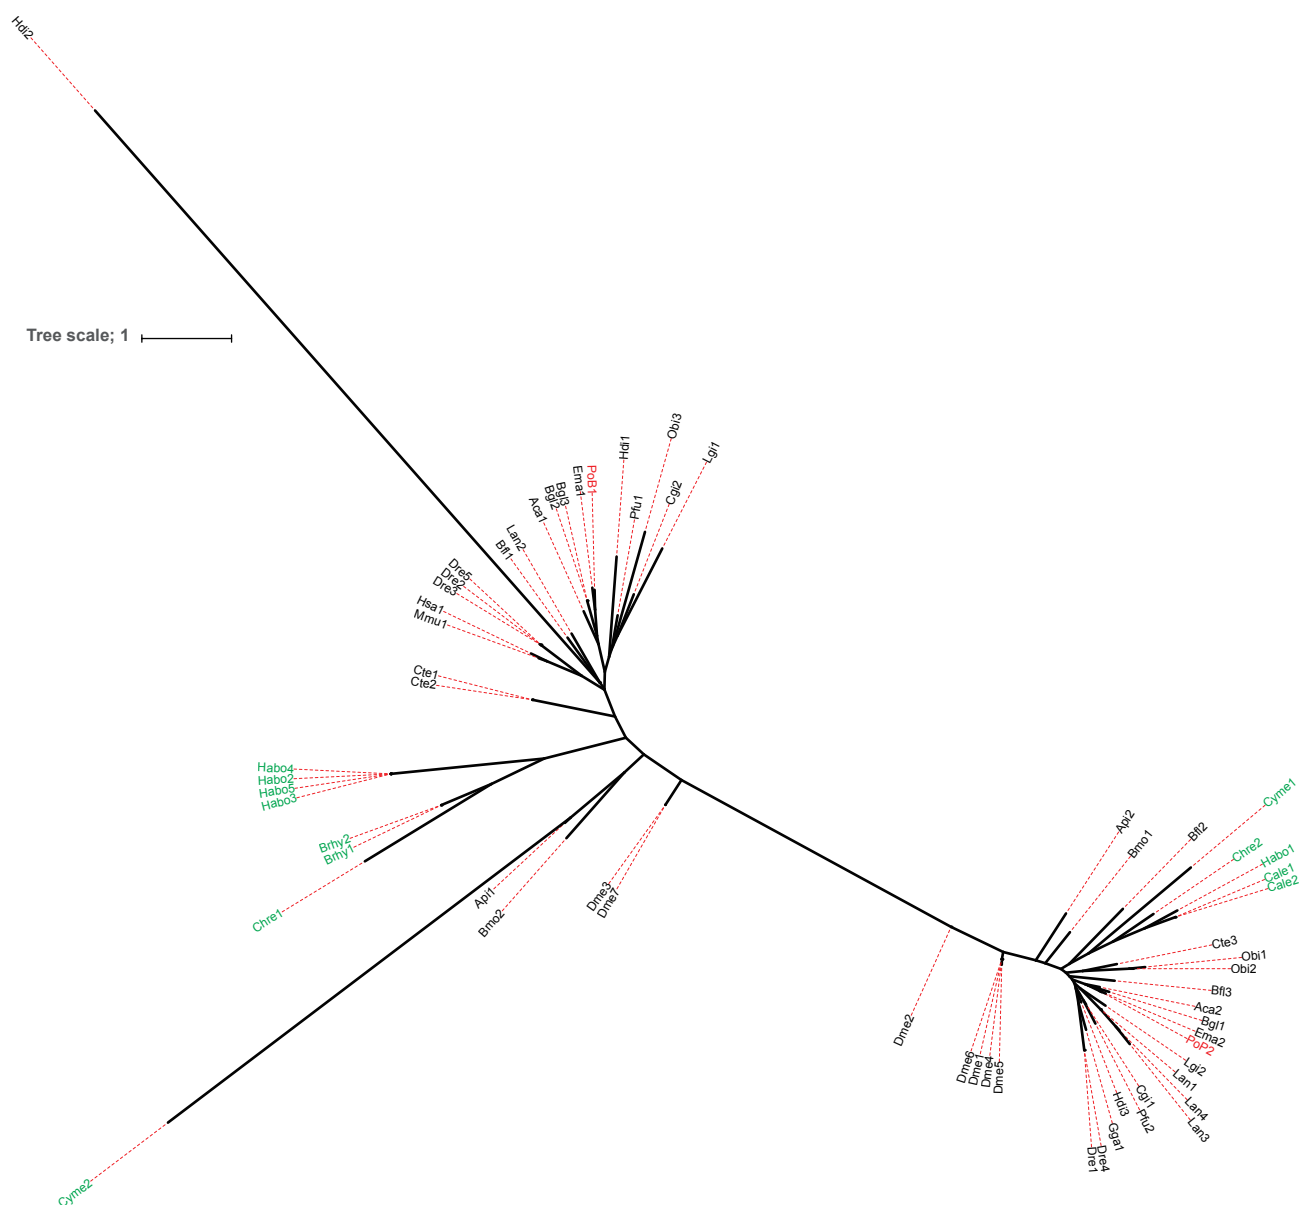

|                                      |                      |                                         |
|--------------------------------------|----------------------|-----------------------------------------|
| Dre1; A0A0R4IS22                     | Dme4; Q24443         | Habo1; c11176_g1_i1_m.22572             |
| Lan1; A0A1S3H867                     | Dme5; Q26373         | Habo2; c11217_g2_i1_m.23039             |
| Lan2; A0A1S3HV36                     | Dre3; Q3B7R6         | Habo3; c11217_g2_i2_m.23046             |
| Lan3; A0A1S3K7R9                     | Mmu1; Q562D6         | Habo4; c11217_g2_i3_m.23050             |
| Lan4; A0A2R2MN91                     | Dme6; Q7JY97         | Habo5; c11217_g2_i4_m.23056             |
| Dme1; A1Z757                         | Dre4; Q7SYI9         | Cale1; g7280.t1                         |
| Dme2; A1Z758                         | Dme7; Q8MR50         | Cale2; g7280.t2                         |
| Dme3; A1Z759                         | Hsa1; Q9BU70         | Cyme1; tr_M1V506_M1V506_CYAM1           |
| Chre1; A8JAN4                        | Chre2; Q9XHE2        | Cyme2; tr_M1VLH0_M1VLH0_CYAM1           |
| Pfu1; aug2.0_4854.1_16038.t1         | Dre5; R4GEK9         | Brhy1; TRINITY_DN11446_c0_g1_i1_m.26666 |
| Pfu2; aug2.0_680.1_01048.t1          | Cte1; R7T6M9         | Brhy2; TRINITY_DN11446_c0_g2_i1_m.26667 |
| Bfl1; C3Y1S2                         | Cte2; R7THN0         |                                         |
| Bfl2; C3ZD92                         | Cte3; R7TV65         |                                         |
| Bfl3; C3ZWY3                         | Aca1; XP_005089019.1 |                                         |
| Ema1; e2072c39.23                    | Lgi1; XP_009048710.1 |                                         |
| PoB1; p440c72.239                    | Lgi2; XP_009060728.1 |                                         |
| PoB2; p855c67.9                      | Cgi1; XP_011422754.2 |                                         |
| Eor2; evm.model.scaffold9727_cov36.9 | Cgi2; XP_011442441.2 |                                         |
| Gga1; F1NSZ2                         | Aca2; XP_012935158.1 |                                         |
| Dre2; F1Q8W7                         | Bgl1; XP_013068586.1 |                                         |
| Bmo1; H9J281                         | Bgl2; XP_013073365.1 |                                         |
| Bmo2; H9JWI3                         | Bgl3; XP_013073366.1 |                                         |
| Hdi1; HDSC00027CG00110               | Obi1; XP_014780460.1 |                                         |
| Hdi2; HDSC04373CG00010               | Obi2; XP_014780461.1 |                                         |
| Hdi3; HDSC07471CG00010               | Obi3; XP_014781937.1 |                                         |
| Api1; J9JT18                         |                      |                                         |
| Api2; J9K3D6                         |                      |                                         |

**Supplementary Figure 20** ML tree for the orthologous group 456 by SonicParanoid.

Colors are as in Supplementary Figure 15.

Raw data, DOI 10.6084/m9.figshare.12318977 and 10.6084/m9.figshare.12319532.

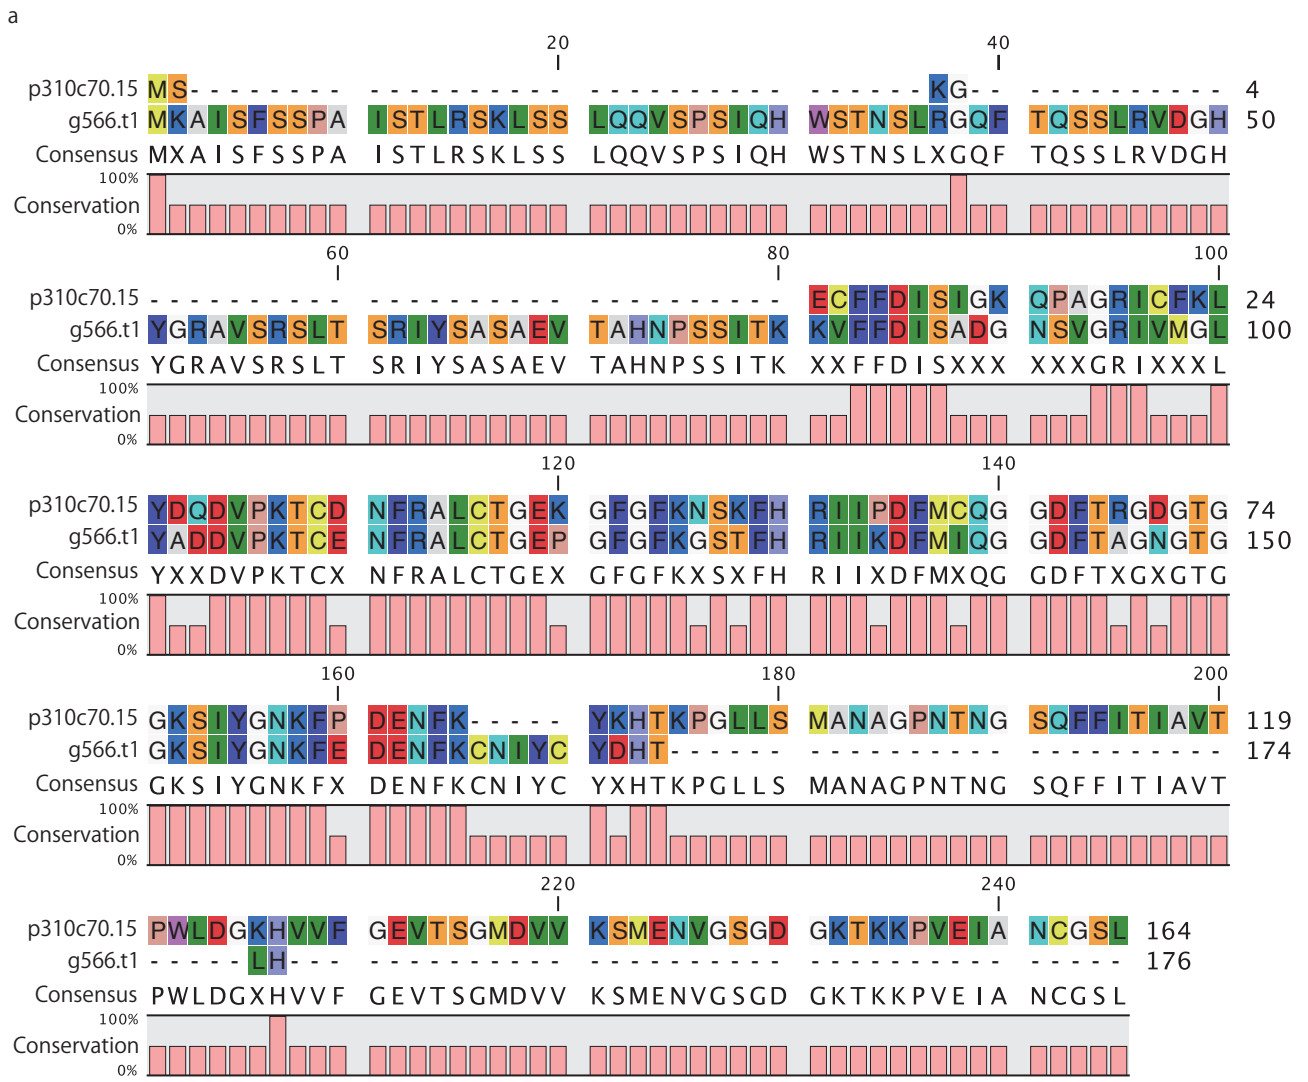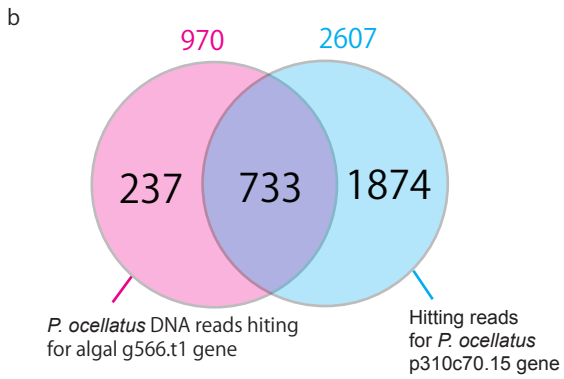

**Supplementary Figure 21** Sequence comparison between g566.t1 (*C. lentillifera*) and p310c70.15 (*P. ocellatus*).  
 a Sequence alignment and similarity b Venn's plot of hit read number from MMseq2 analysis. DB = pre-assembling Illumina DNA sequencing read (DRR029525 and DRR029526, also see 10.6084/m9.figshare.12301277)

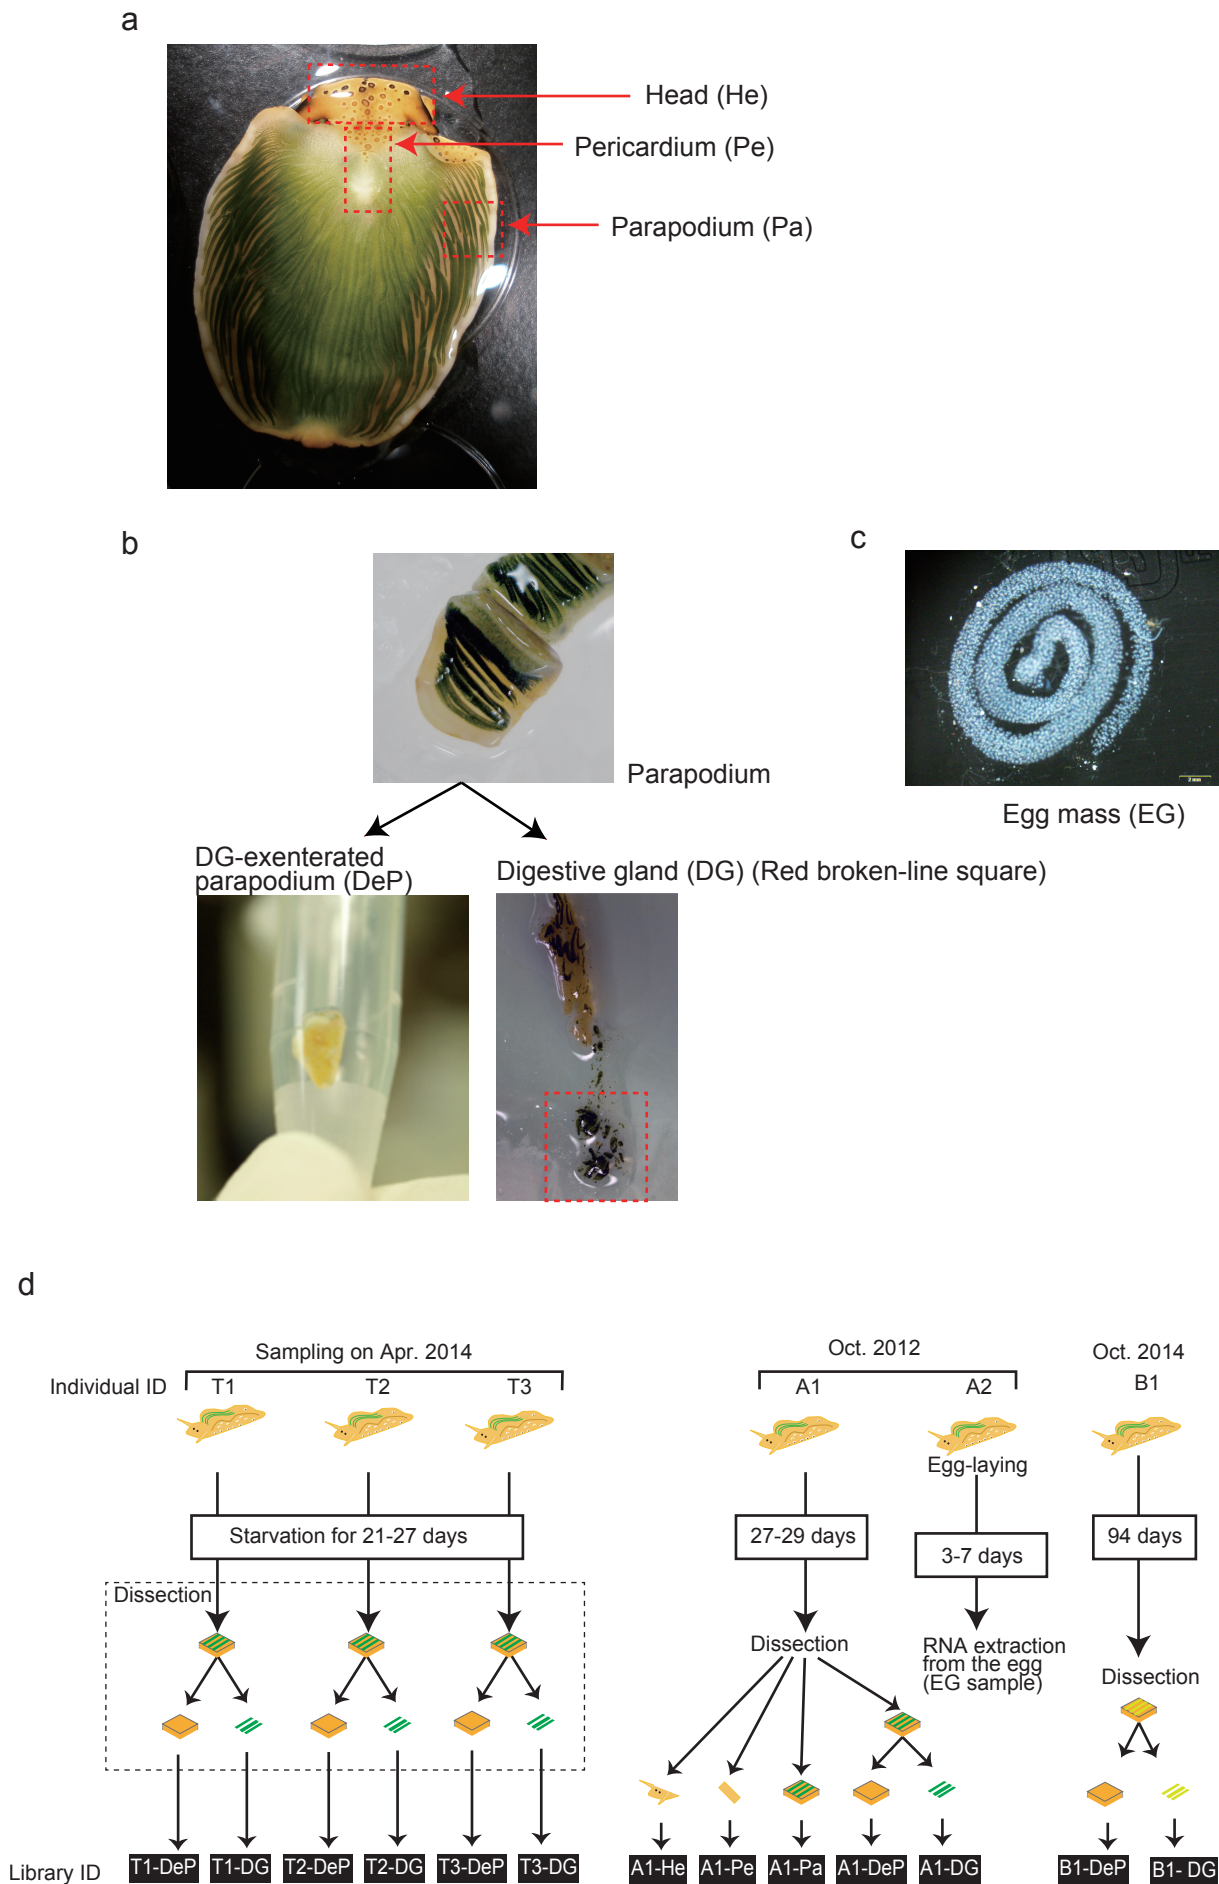

**Supplementary Figure 22**

**a** Overview of the *P. ocellatus* dissection and the positions of each sample tissue. **b** Pictures of dissected parapodium, digestive gland, and parapodium without digestive gland. Digestive glands were obtained from parapodium using a razor by hand. **c** Egg mass of PoB. **d** Incubation states of the dissected sea slug and interaction among the samples.

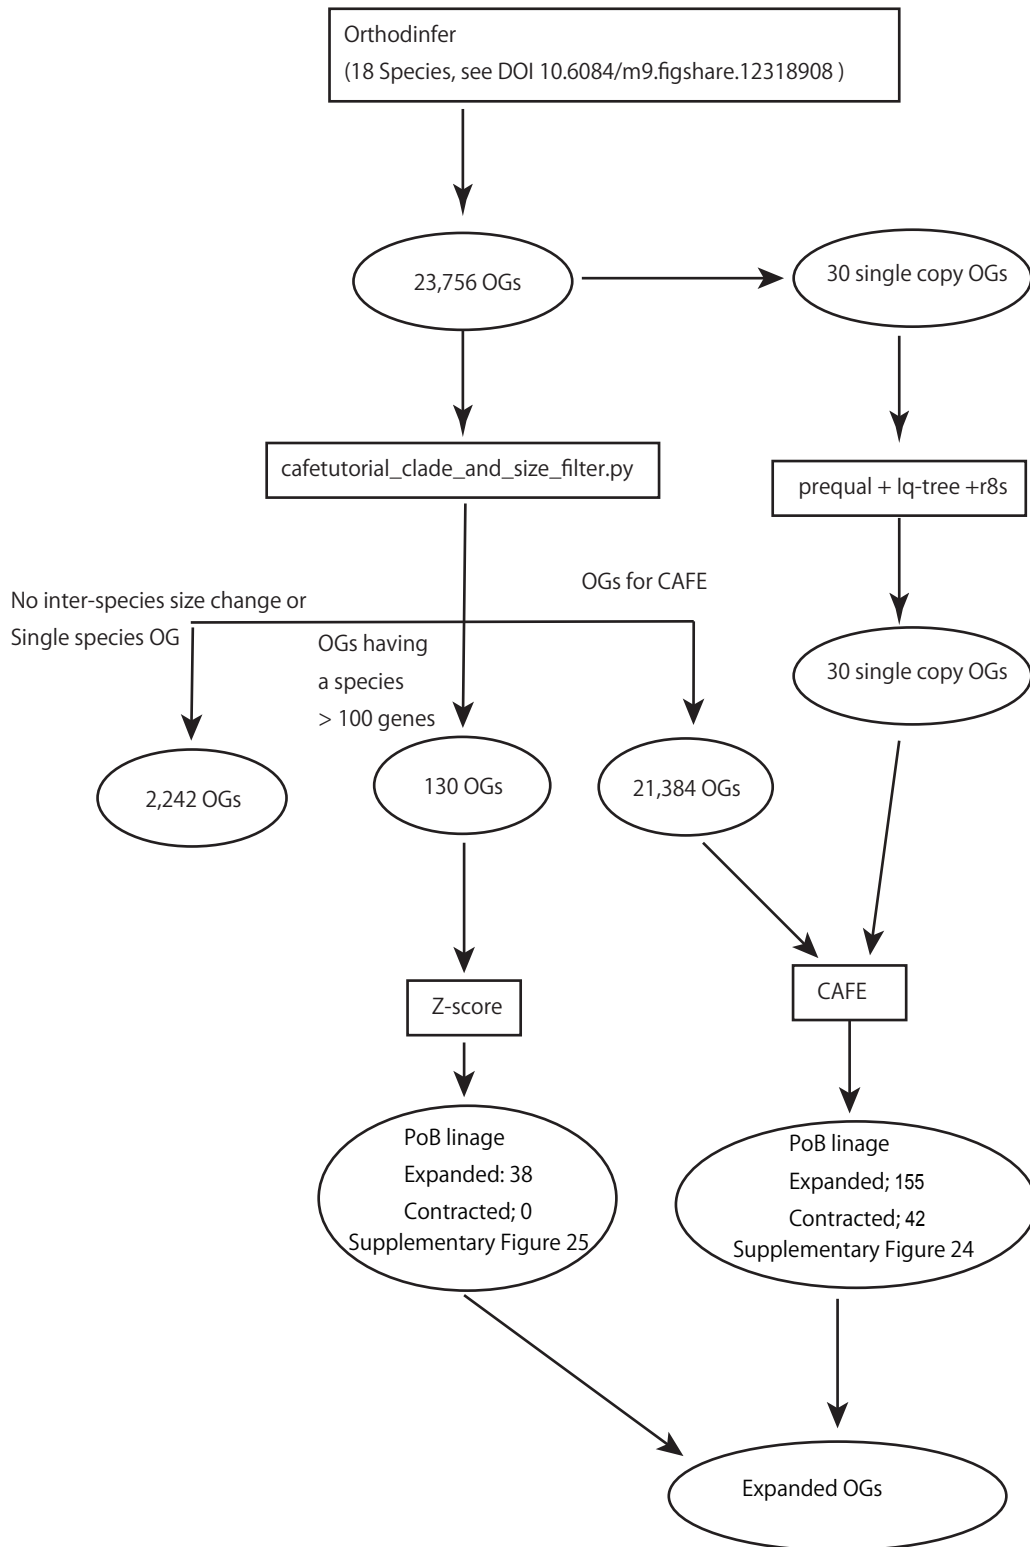

**Supplementary Figure 23** Procedure of gene family history analyses.

Circle means the adapted analysis and square boxes mean obtained orthogroup (OG) dataset.



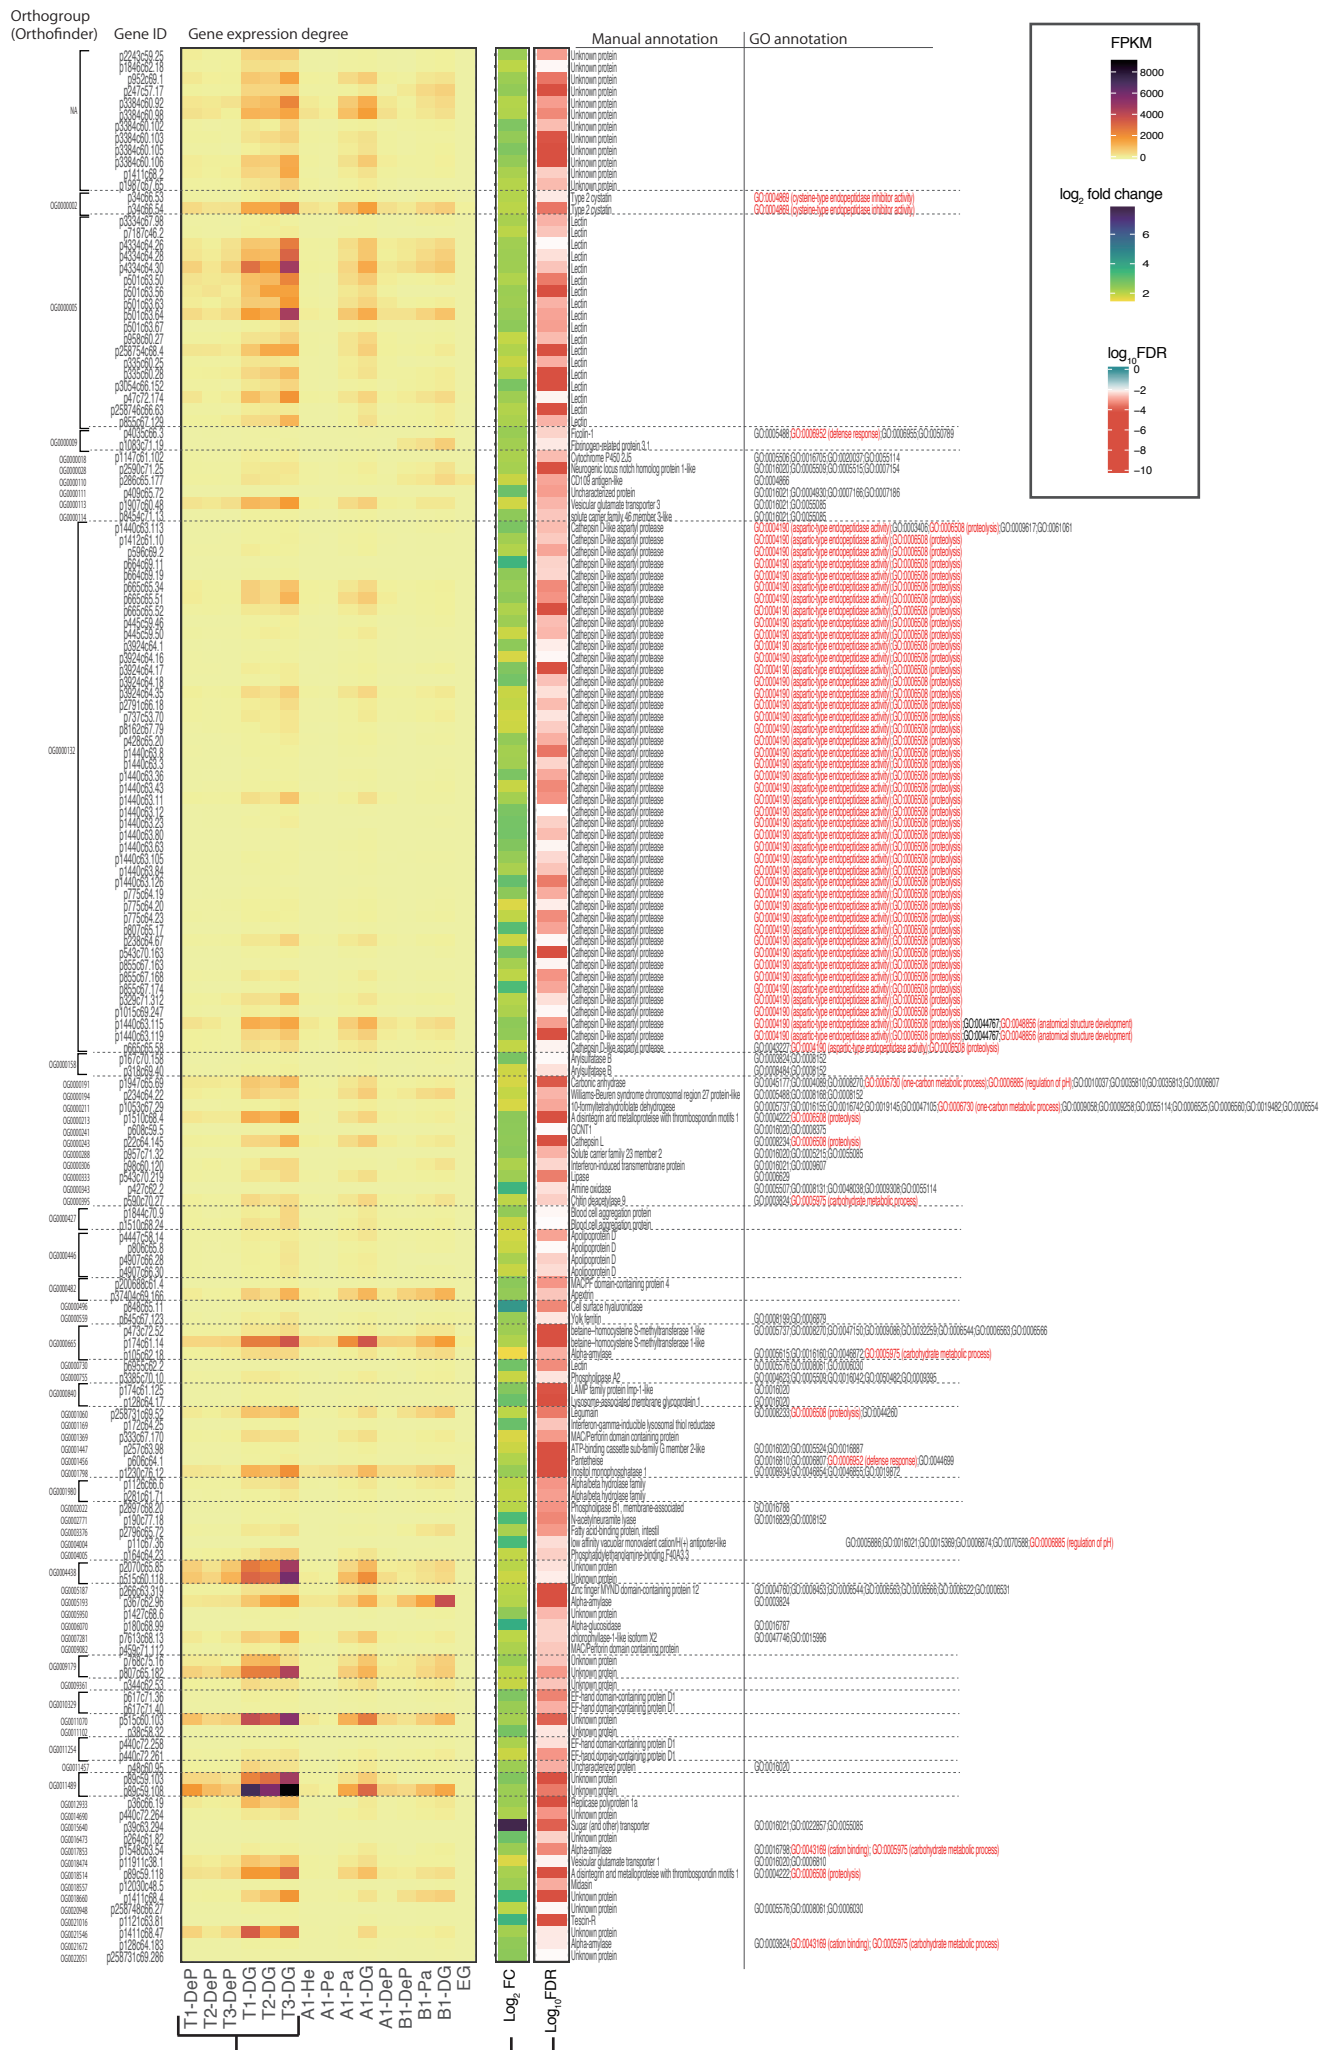

Supplementary Figure 24 DG-upregulated genes by the RNA-Seq comparison.

Raw data, DOI 10.6084/m9.figshare.12319826.

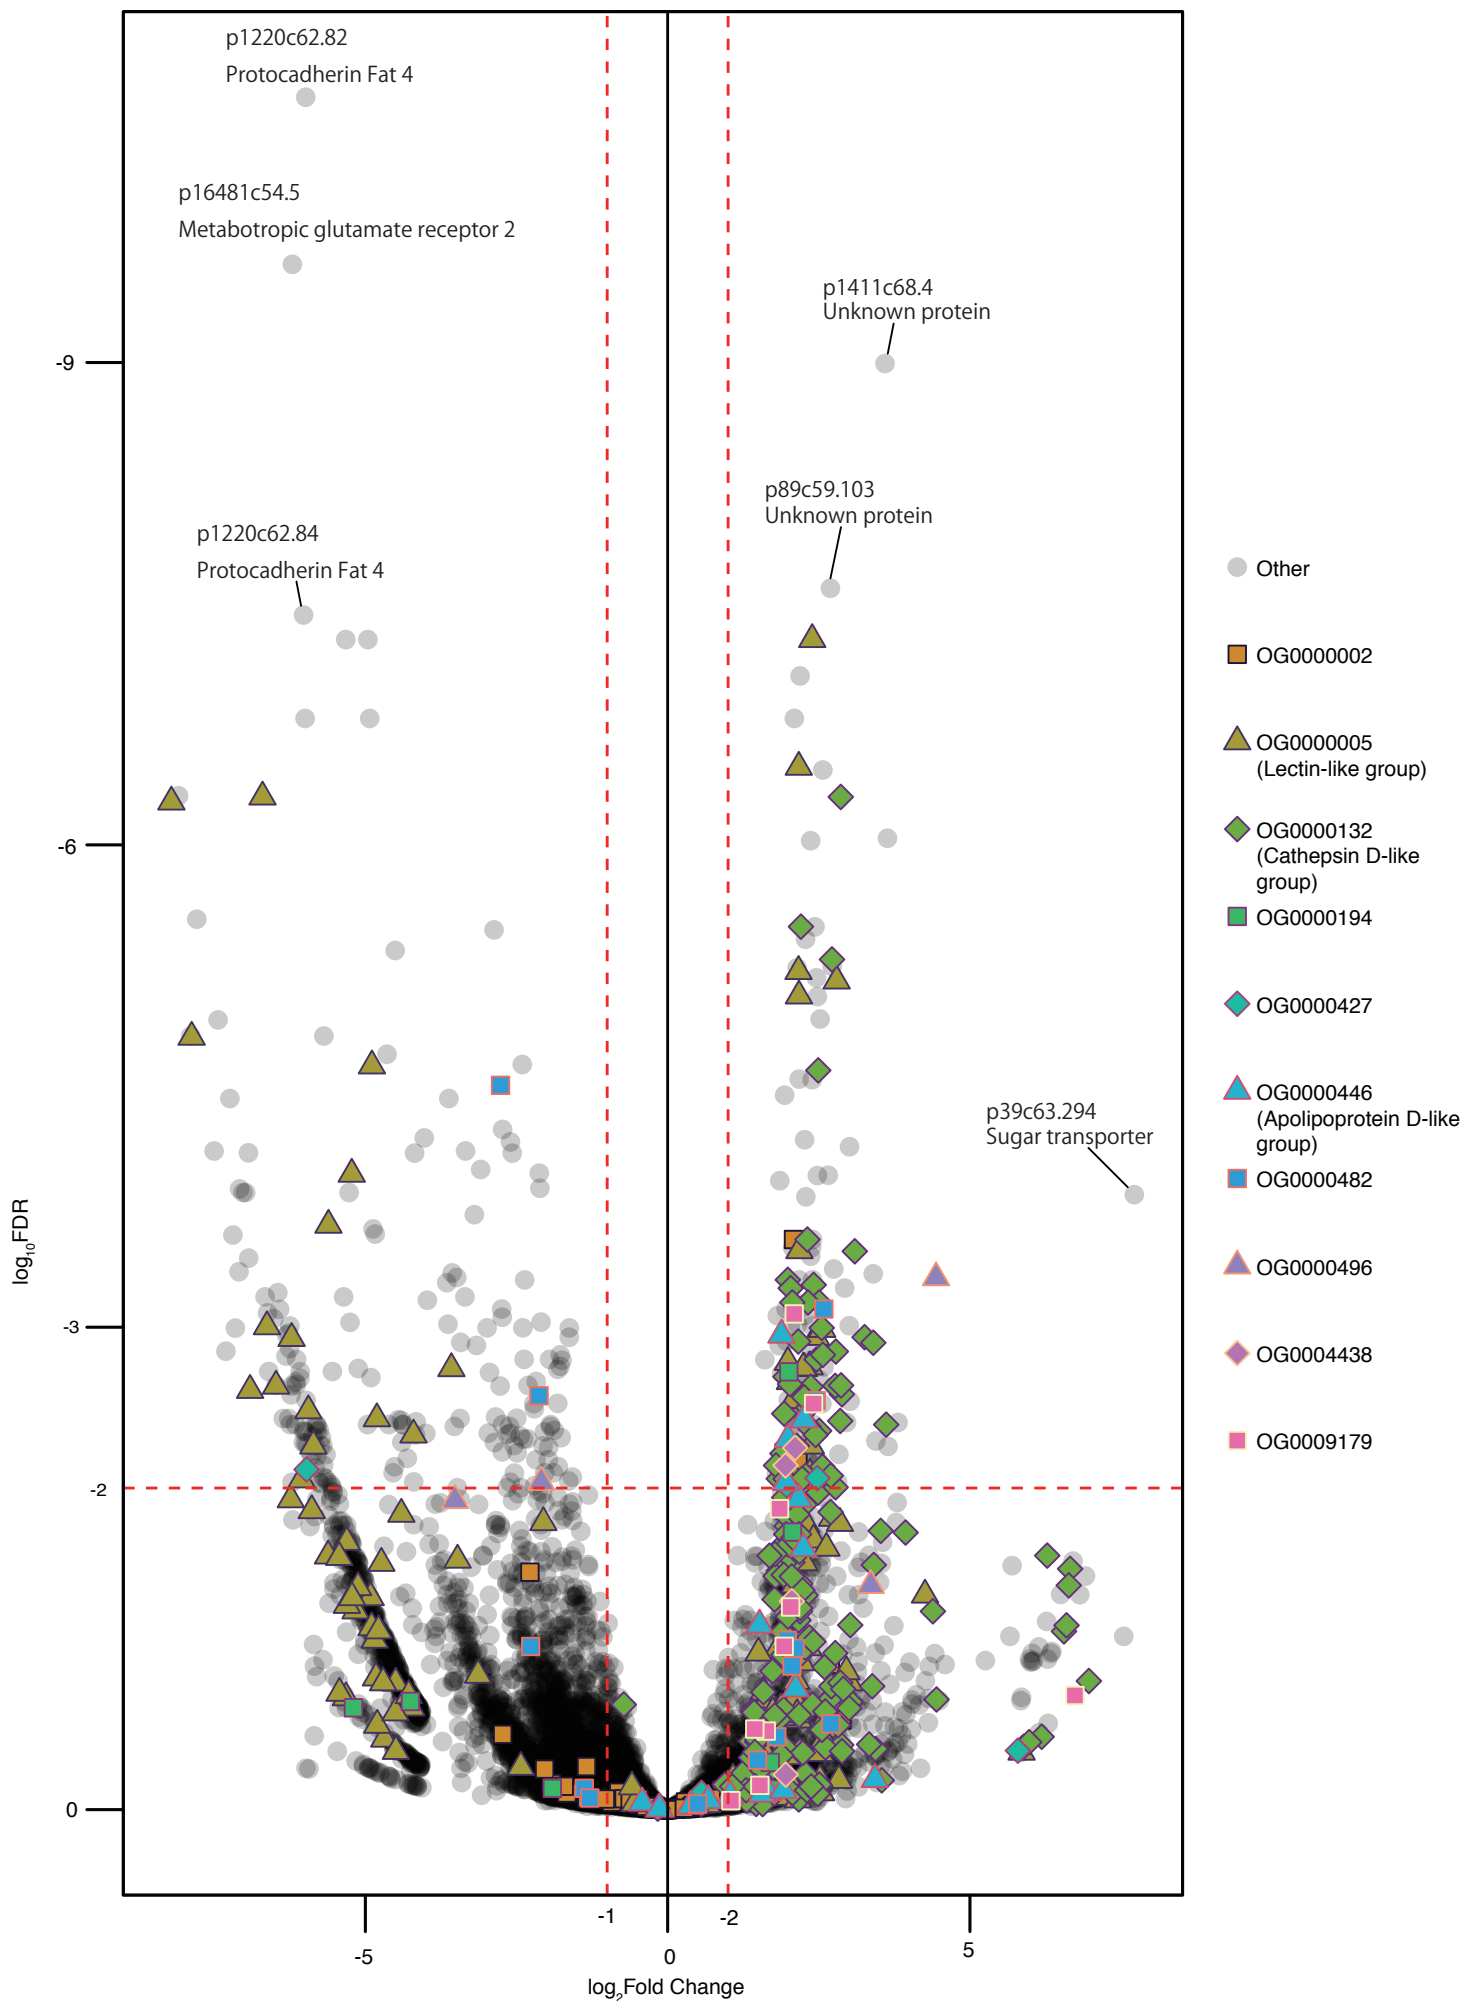

**Supplementary Figure 25** Volcano plot of the cross-tissue comparison between DG and DeP. Each dot represents a gene. Colors and dot shapes mean the belonging orthogroups of each gene. Raw data, DOI 10.6084/m9.figshare.12319826

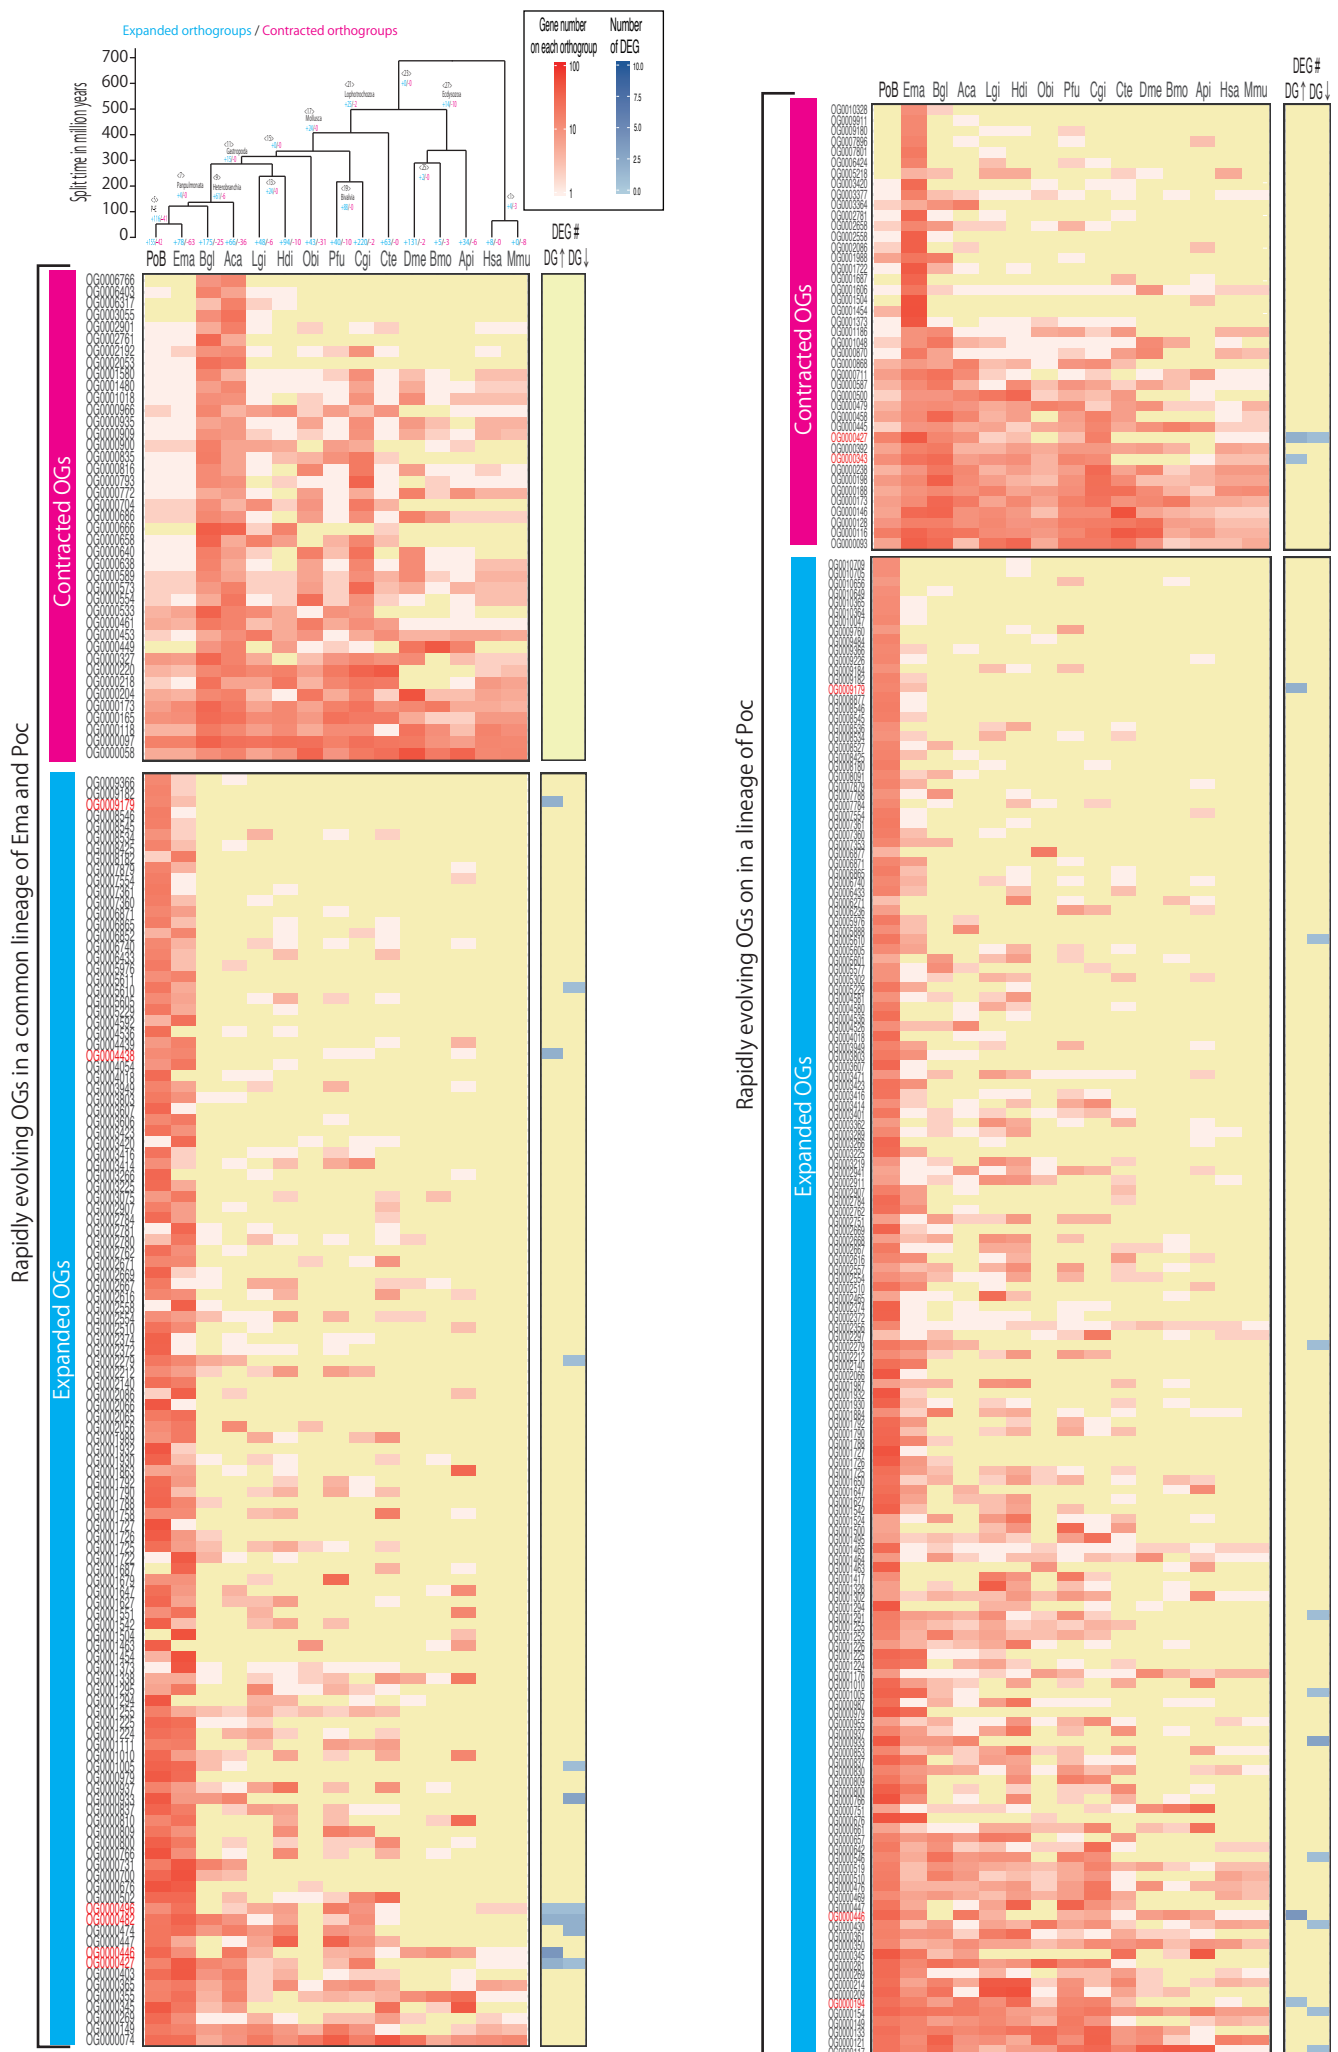

**Supplementary Figure 26** CAFE-based all rapidly evolving genes on the sacoglossan lineage. The gene count of all rapidly evolving orthogroups on *P. ocellatus* (left side) and the common node between *P. ocellatus* and *E. marginata* (right side) were plotted with a heat map. The red color means the number of genes. The blue color indicates the number of differentially expressed genes between DG and DeP tissue.

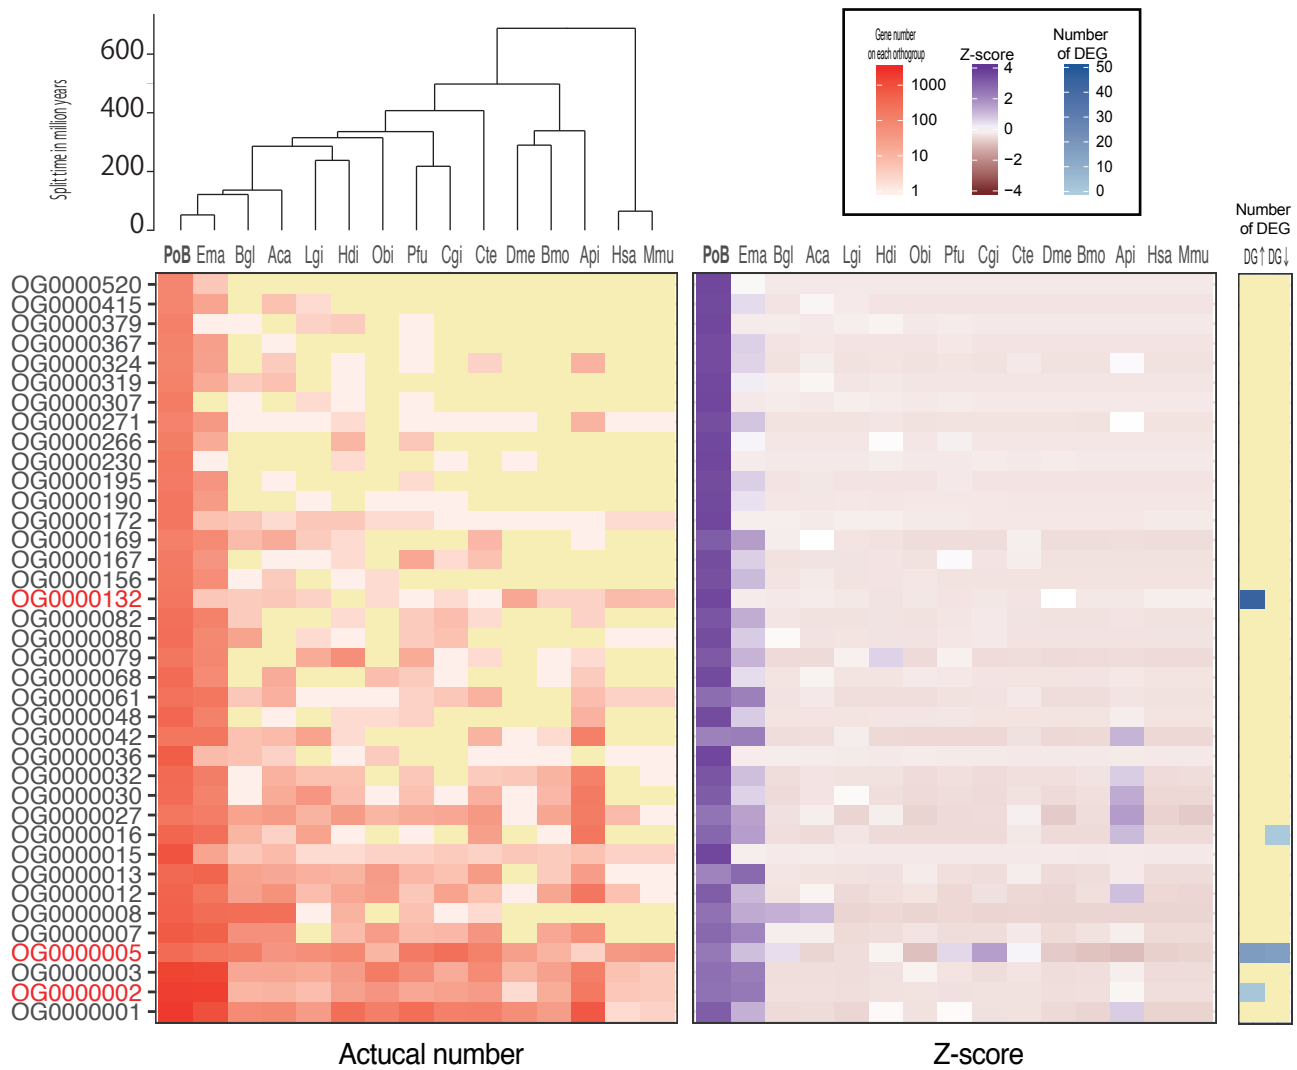

**Supplementary Figure 27** Z-score-based rapidly evolving genes on the *P. ocellatus* lineage.

Color legends were described on the top right box.

OG0000132: Cathepsin D like (CD-like)

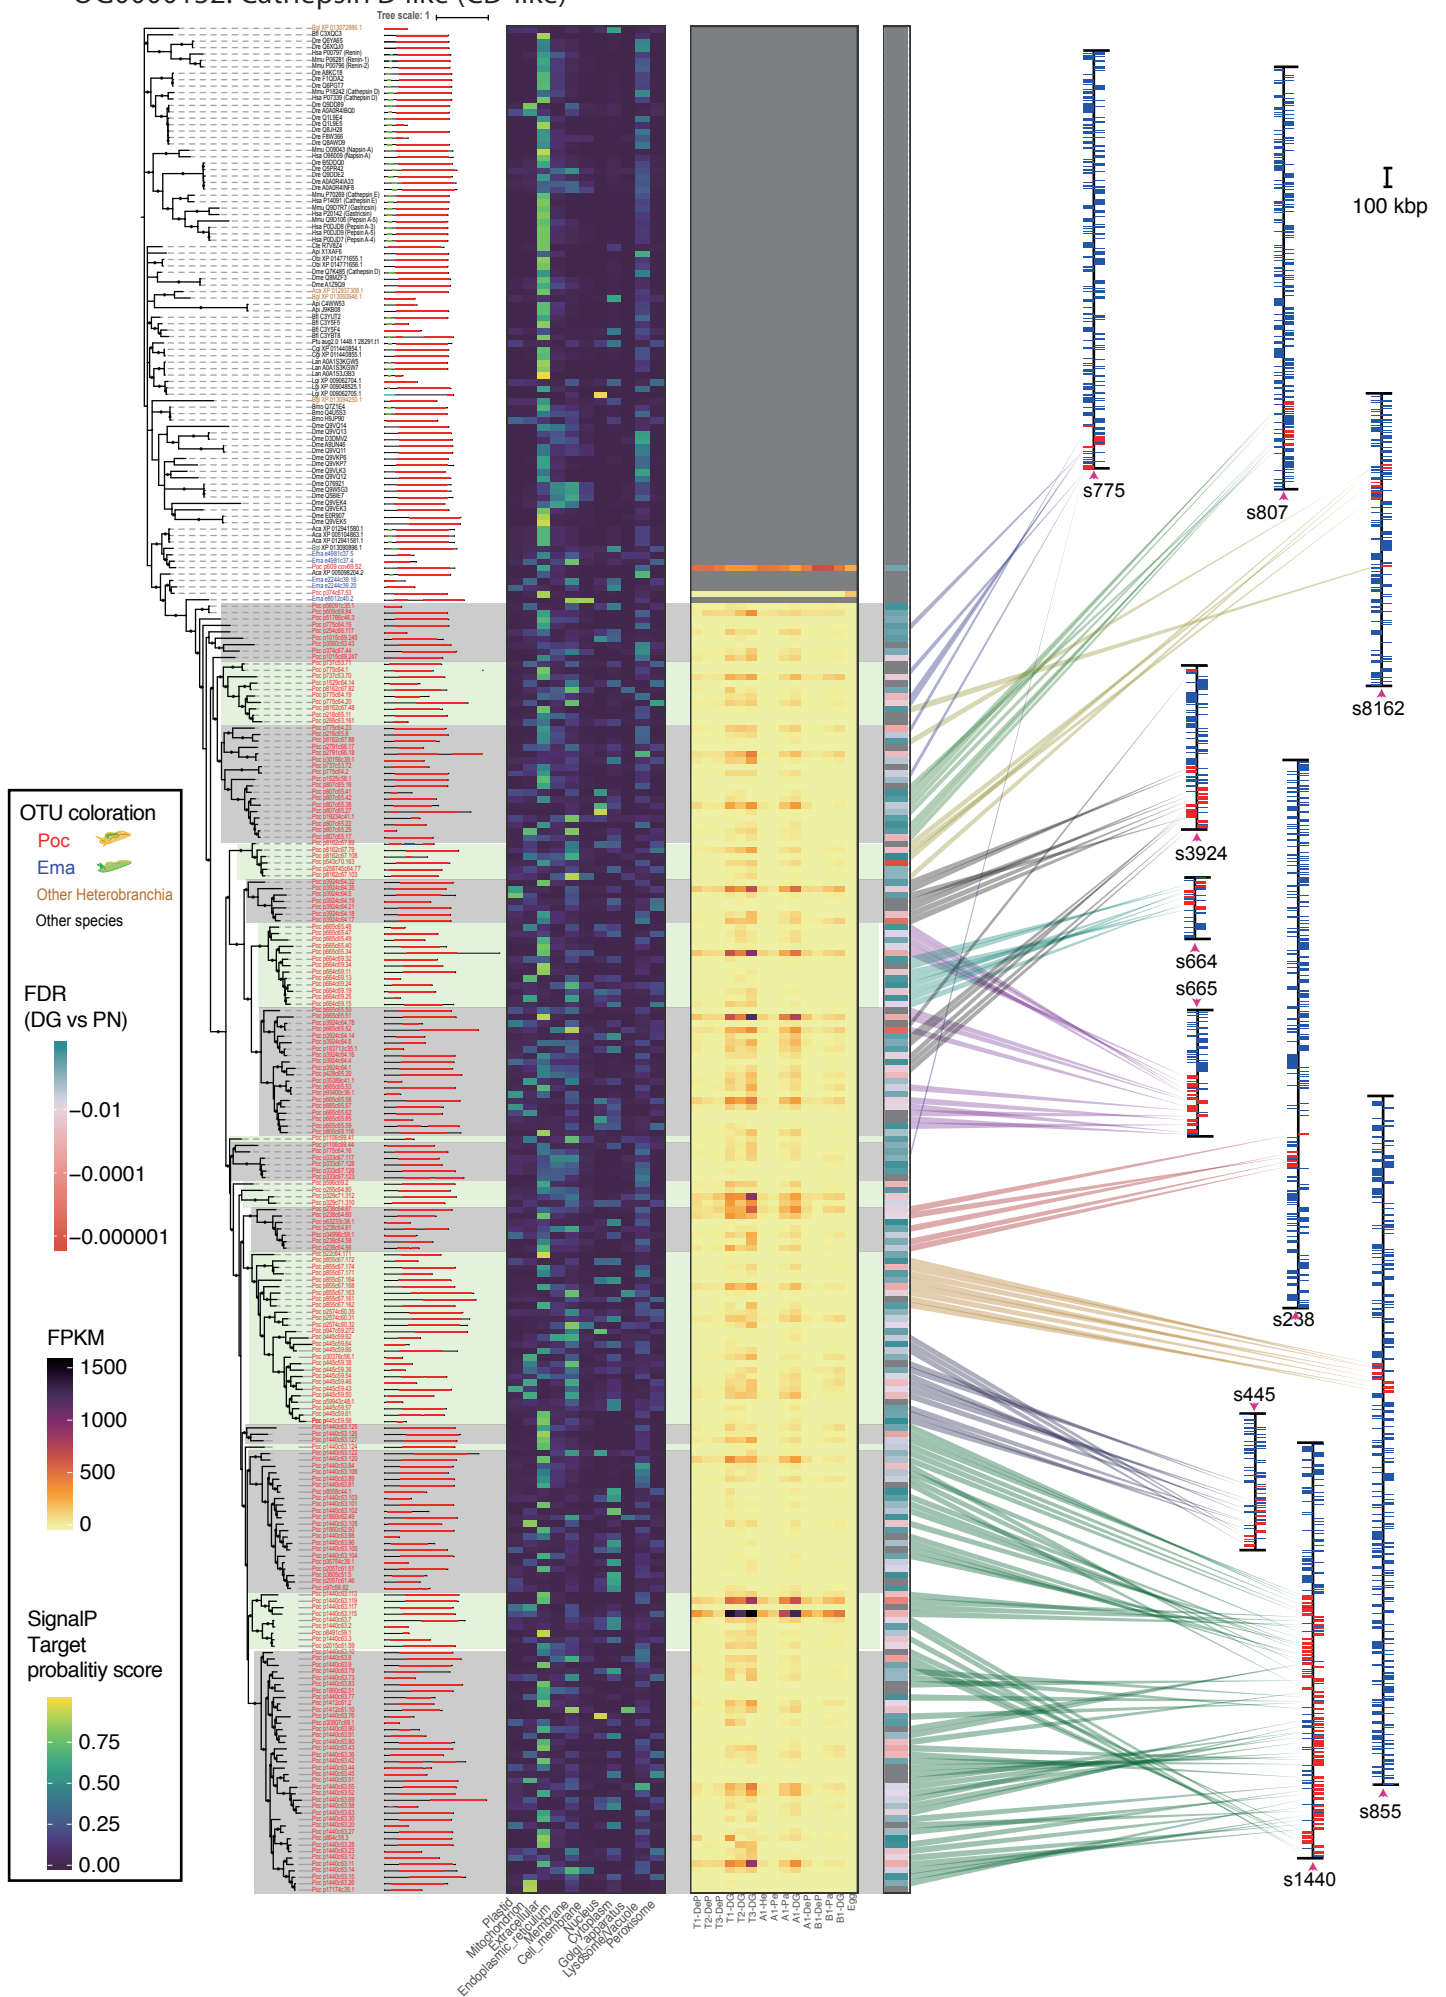

**Supplementary Figure 28** Gene tree for the all member of OG0000132 (Cathepsin D like), predicted intracellular location with SignalP, expression profiles in cross-tissue RNA-Seq, and the gene position on *P. ocellatus* genome. Color legends were described on the left box.

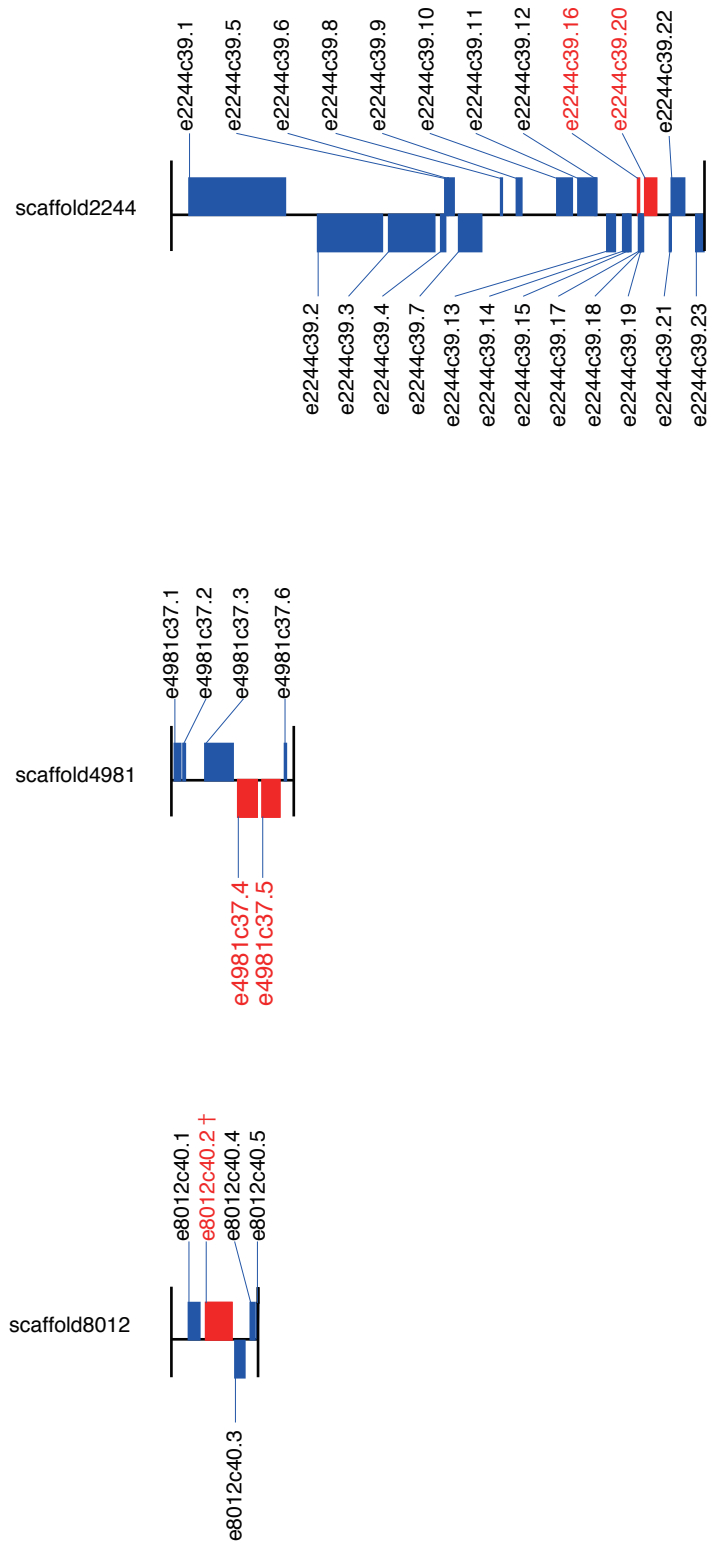

**Supplementary Figure 29** Gene positions of OG0000132 on *E. marginata* genome. Red; OG0000132 genes. Blue; other genes. †Clade-γ gene

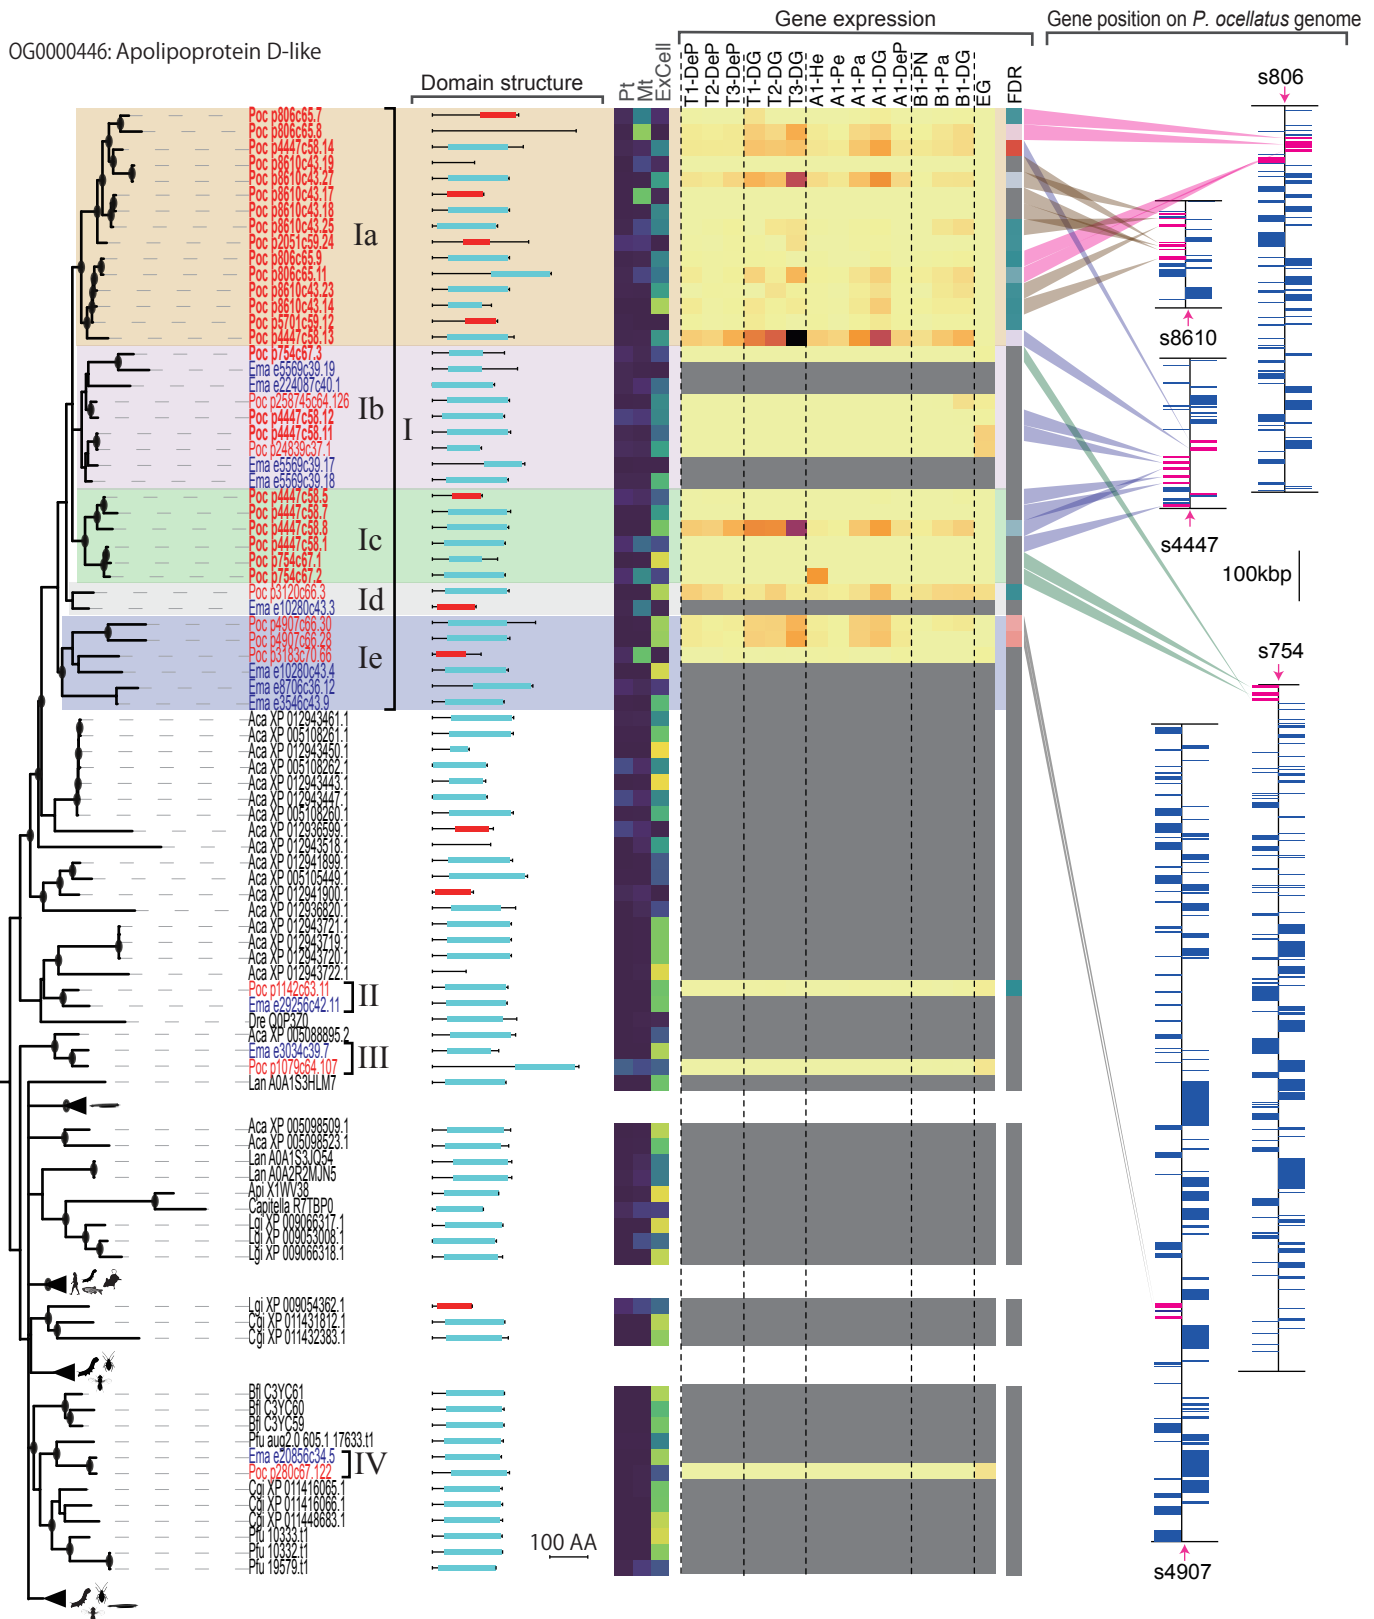

**Supplementary Figure 30** Gene tree for the member of OG0000446 (Apolipoprotein D-like), predicted intracellular location with SignalP, expression profiles in cross-tissue RNA-Seq, and the gene position on *P. ocellatus* genome. Color legends were described on the bottom box.

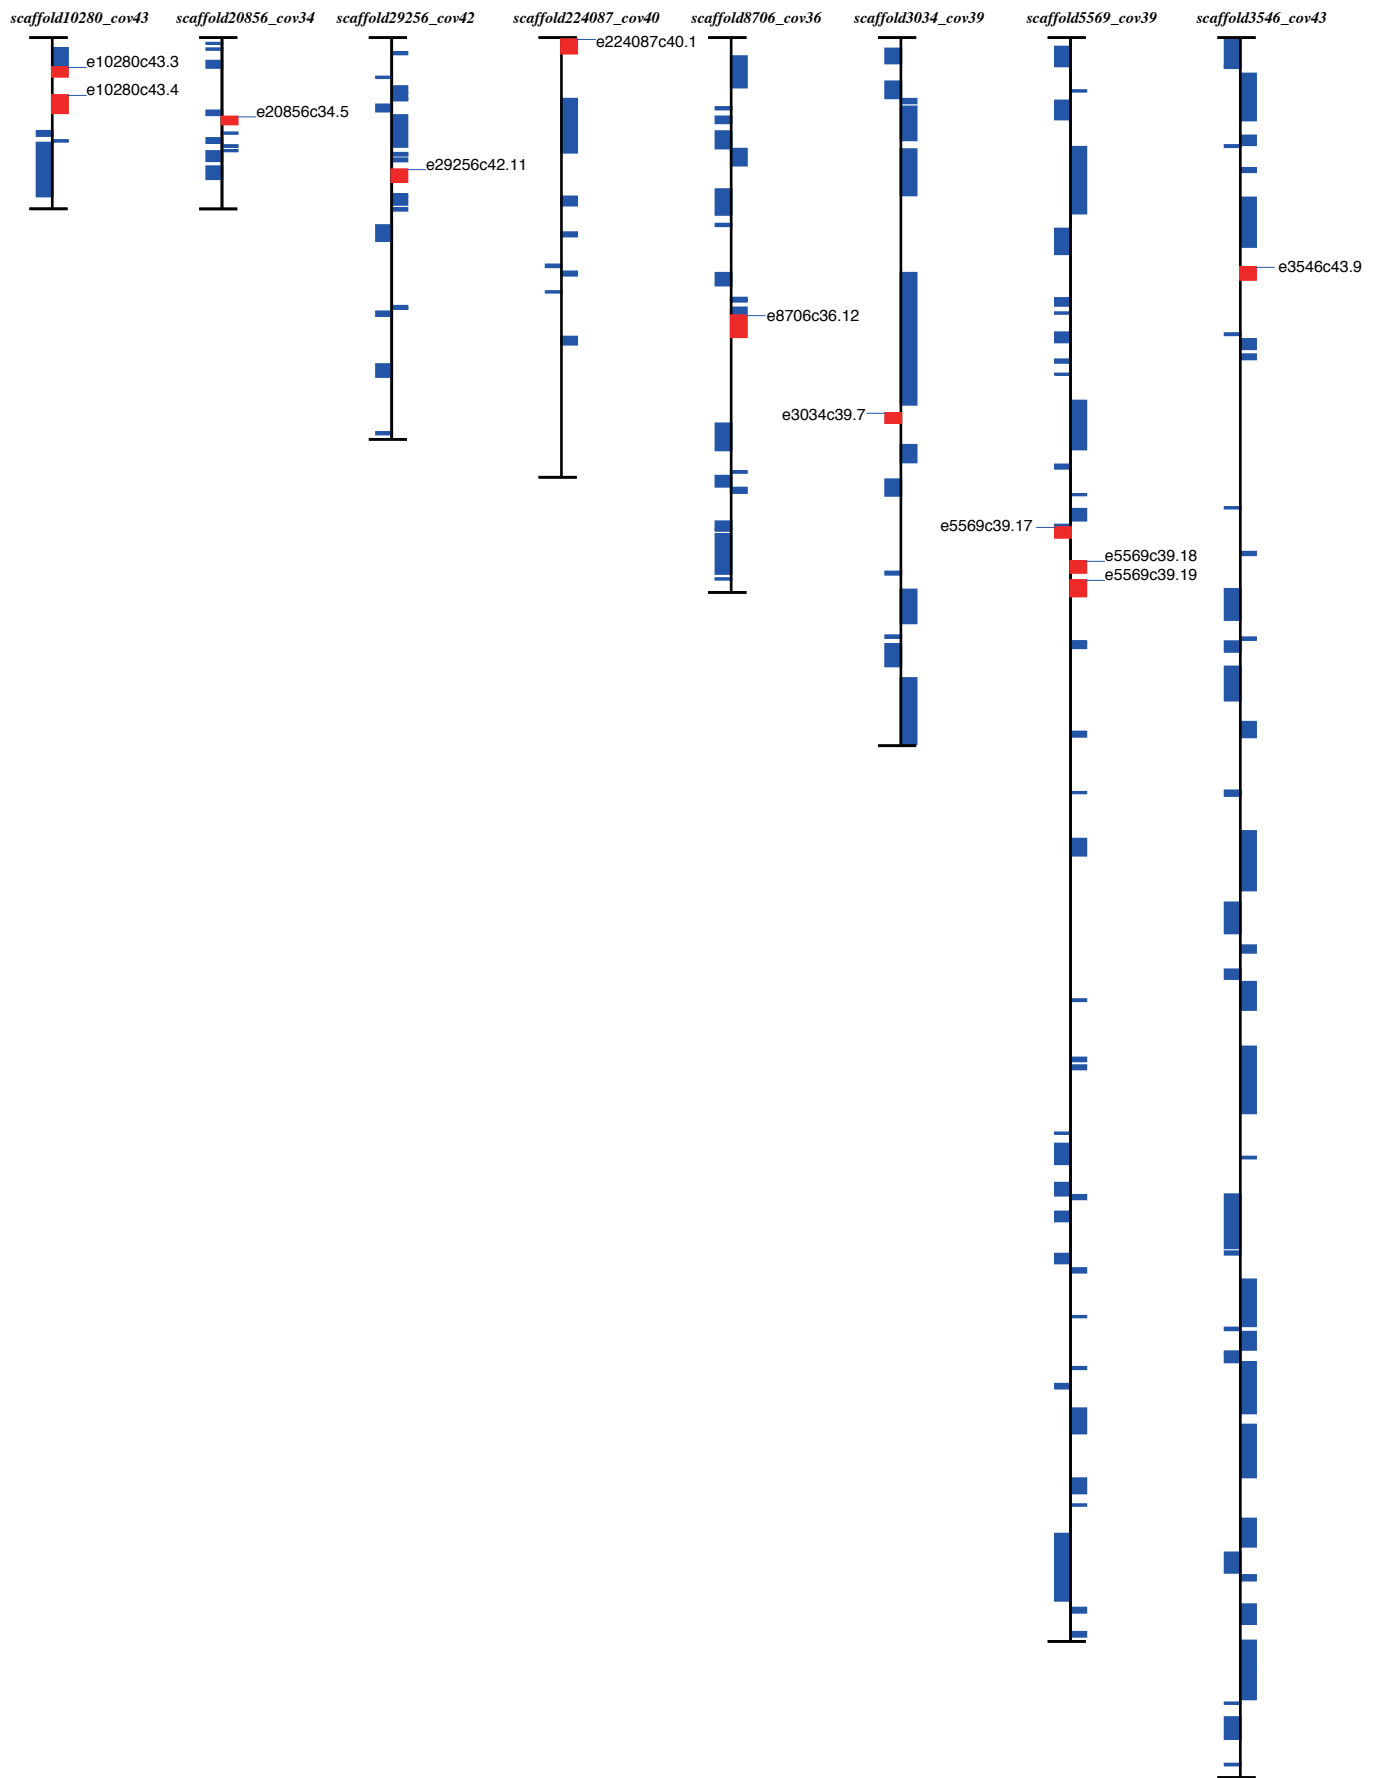

**Supplementary Figure 31** Gene positions of OG0000446 on *E. marginata* genome.  
 Red; OG0000446 genes, Blue; other genes.



OG0000005; Lectin group

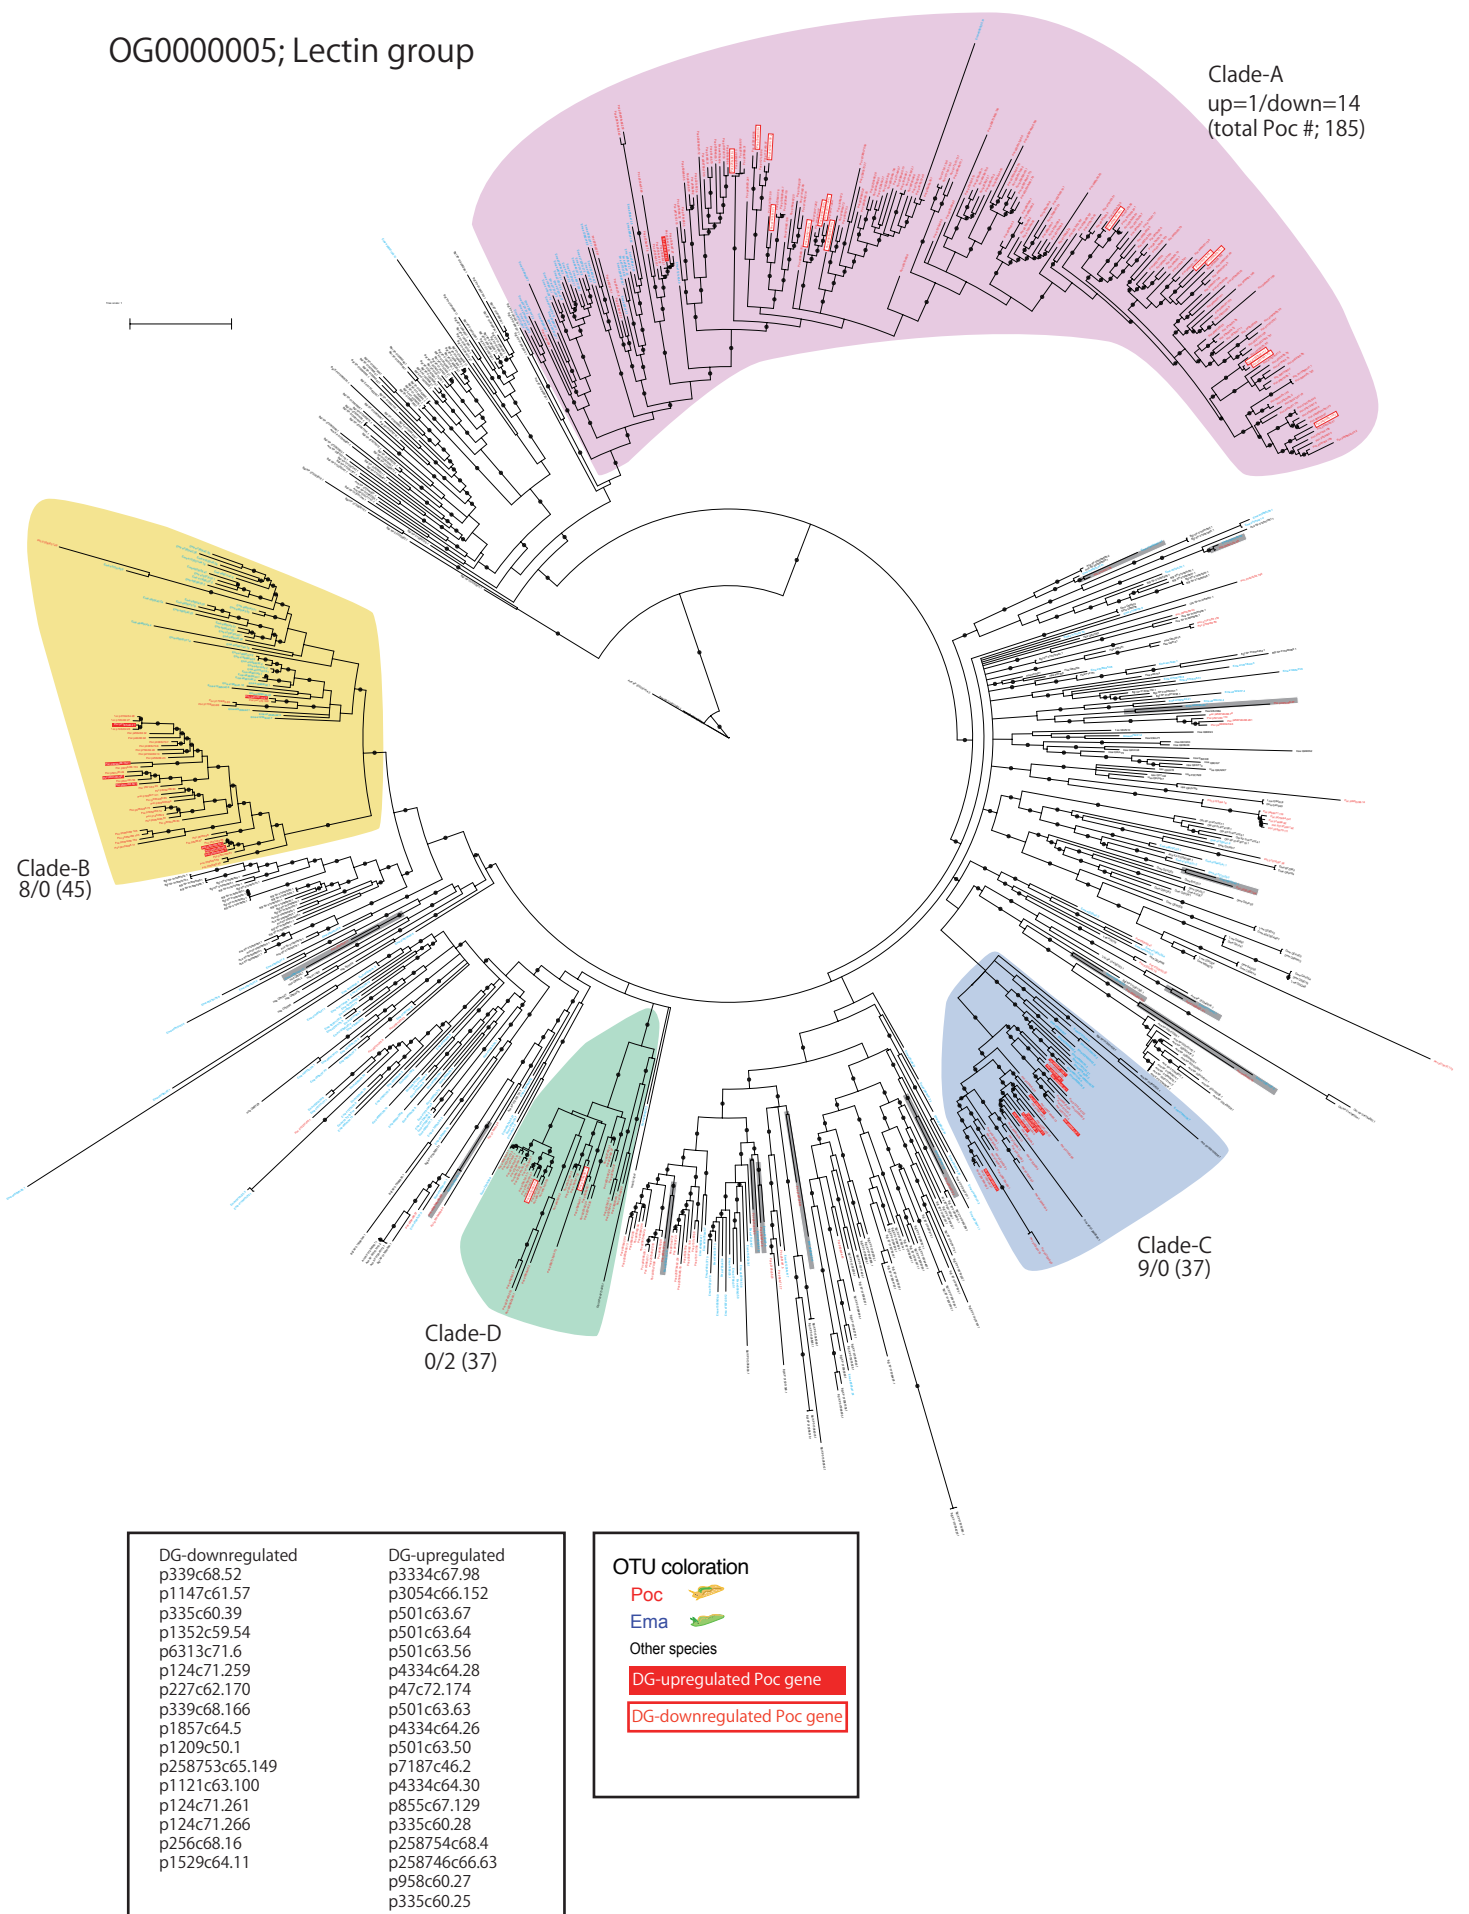

**Supplementary Figure 32** Gene tree for the member of OG0000005 (Lectin-like). The black dot on the node indicates the Bootstrap support over 80. One-by-one ortholog pairs were masked with gray color.

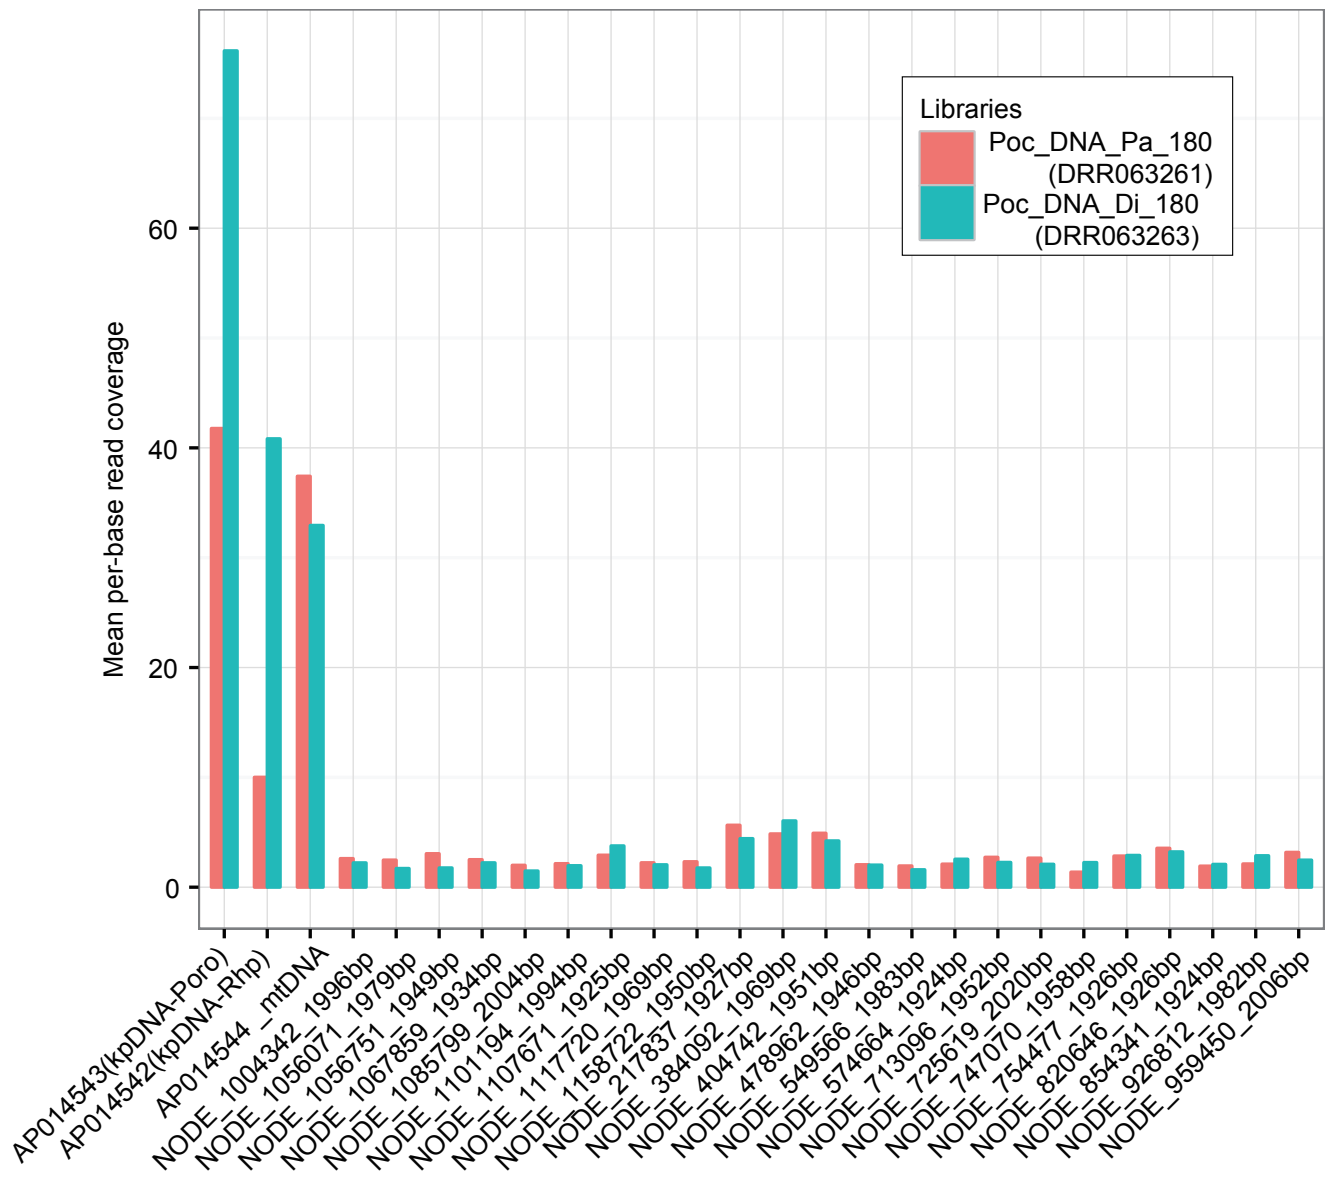

**Supplementary Figure 33** Read coverage depth of the constructed *P. ocellatus* genomic assemblies. We mapped the two libraries to the constructed assemblies to determine the origin of each assemblies. The “Poc\_DNA\_Pa\_180” is a kleptoplast-poor sample and “Poc\_DNA\_Di\_180” is a kleptoplast-enriched sample. Considerable change of depth on AP014543 and AP014542 reflects the different origin (kleptoplast) of the assemblies from the rest data.

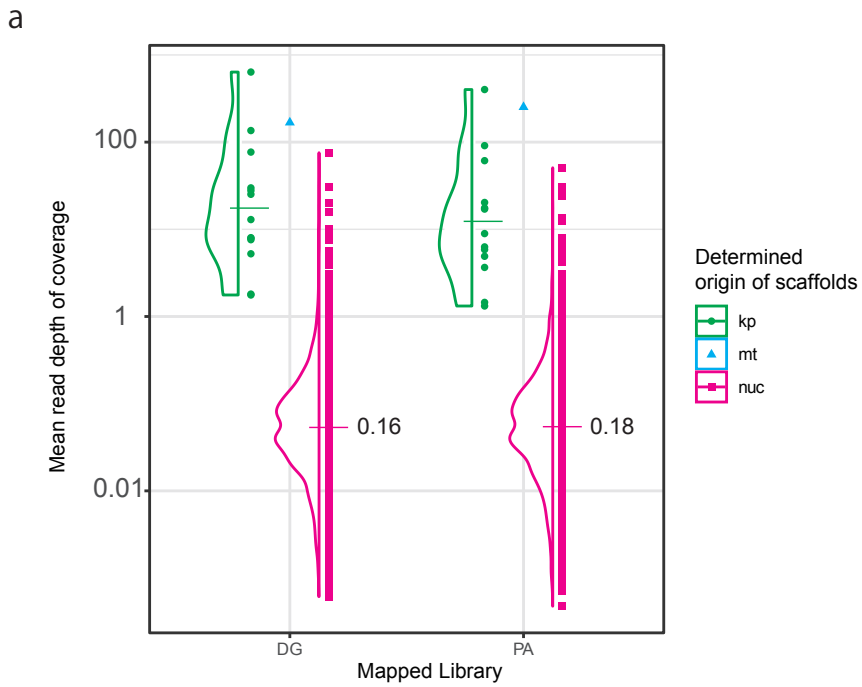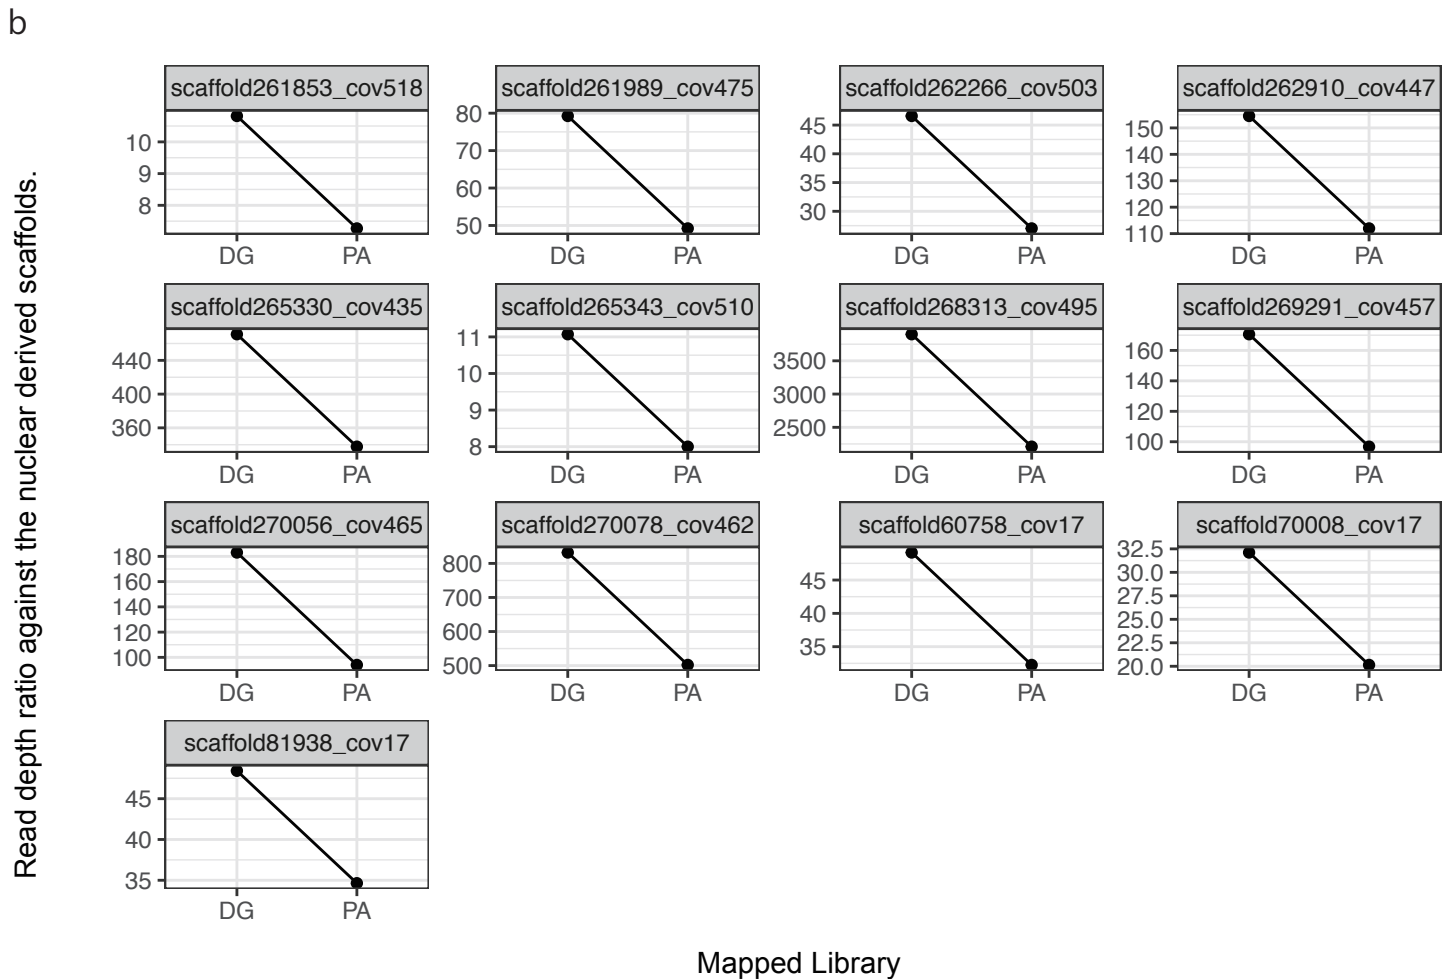

**Supplementary Figure 34** Read depth of the PoB genome assemblies. Two types of the Illumina library form PoB DNA (DG = digestive gland , PA = parapodium) were mapped to the 13 kleptoplastic (kp), 1 mitochondrial (mt), and 8647 nuclear (nuc) scaffolds. **a** Violin and scatter plot of the mapped read depth. Each dot means a scaffold, the average of depth values was indicated as a horizontal bar. The legend of coloration are indicated in the right box. **b** Line graph of the relative value of the read depth of the kleptoplastic scaffolds against the averaged depth of all nuclear scaffolds in each library. Kleptoplastic scaffold IDs were described on the top of each graph.

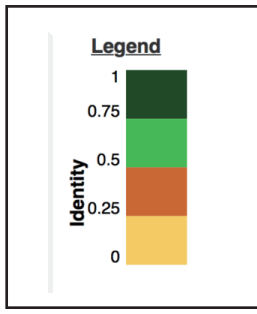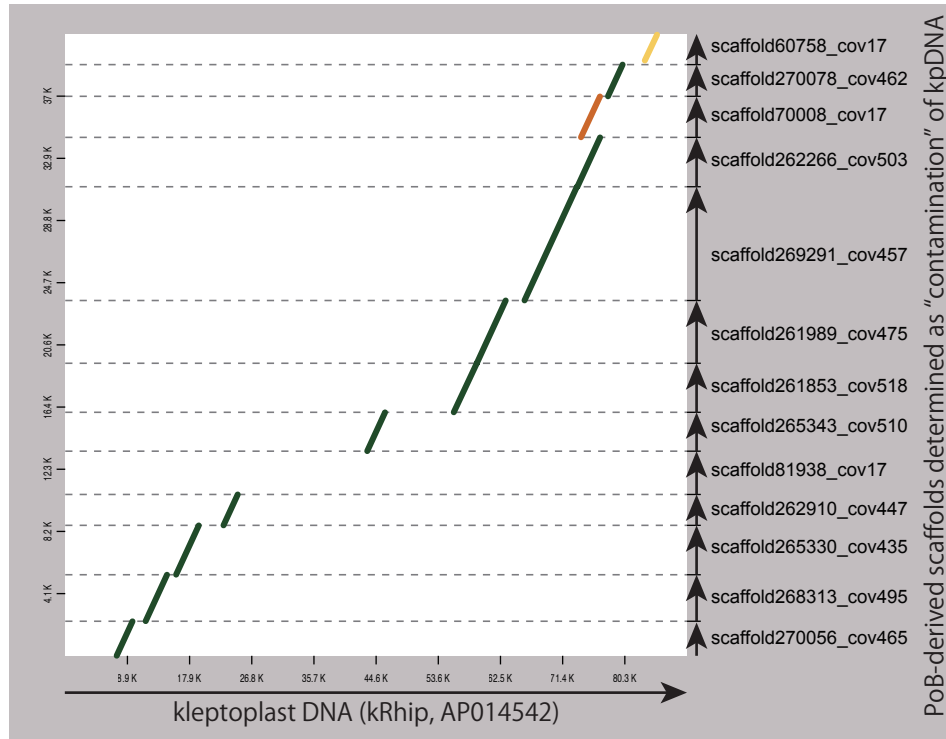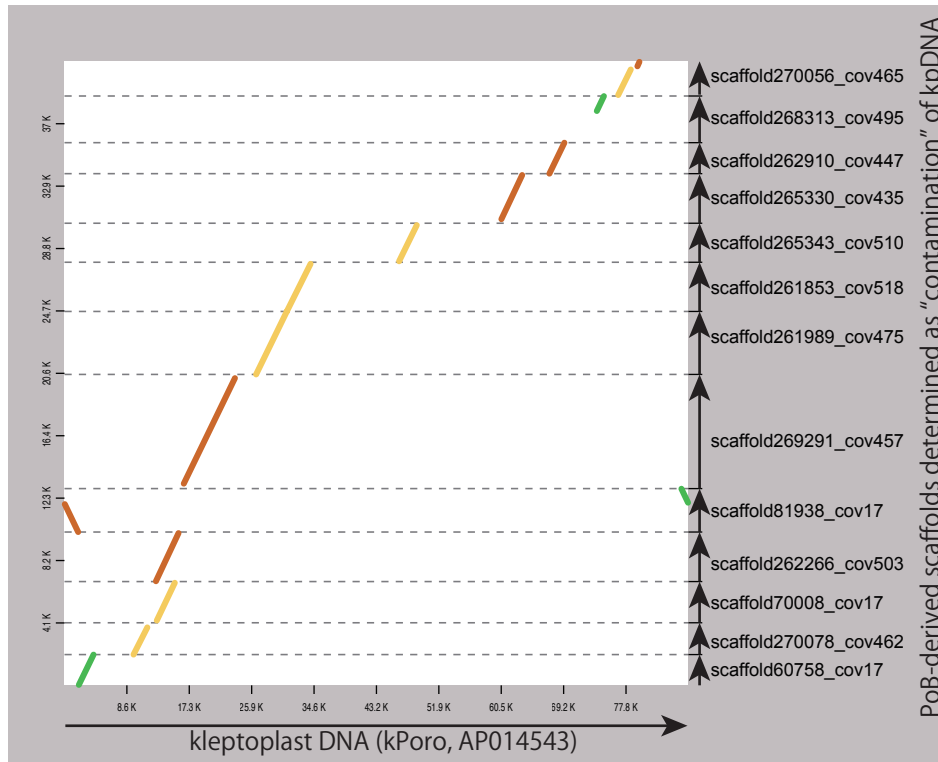

**Supplementary Figure 35** Dot plot of the referential kleptoplast DNAs and PoB genomic scaffolds determined as the kleptoplast DNA (kpDNA). X-axis, referential kleptoplast DNAs (kPoro and kRhip). Y-axis, 13 scaffolds that were determined as kpDNA sequences. The diagonals indicate matching contiguously aligned regions. The coloration indicates the identity of the aligned regions. The legend of similarity coloration are indicated in the top left box. Arrows indicate the aligned sequences and direction. We used D-GENIES software to make the dot-plots. Although the "scaffold81938\_cov17" and "scaffold268313\_cov495" were aligned to only one of the two referential kpDNAs, this discrepancy may be due to the fact that PoB retain chloroplasts derived from multiple algal species simultaneously, and the sequence of chloroplast DNA varies considerably between algal species (see Supplementary Figure 36). The reason for the differences from the reference maybe because those scaffolds are derived from minor kleptoplasts whose genomes have not yet been sequenced. Overall, these results support that the the sequence of 13 scaffolds are not derived from anything other than chloroplasts/kleptoplast.

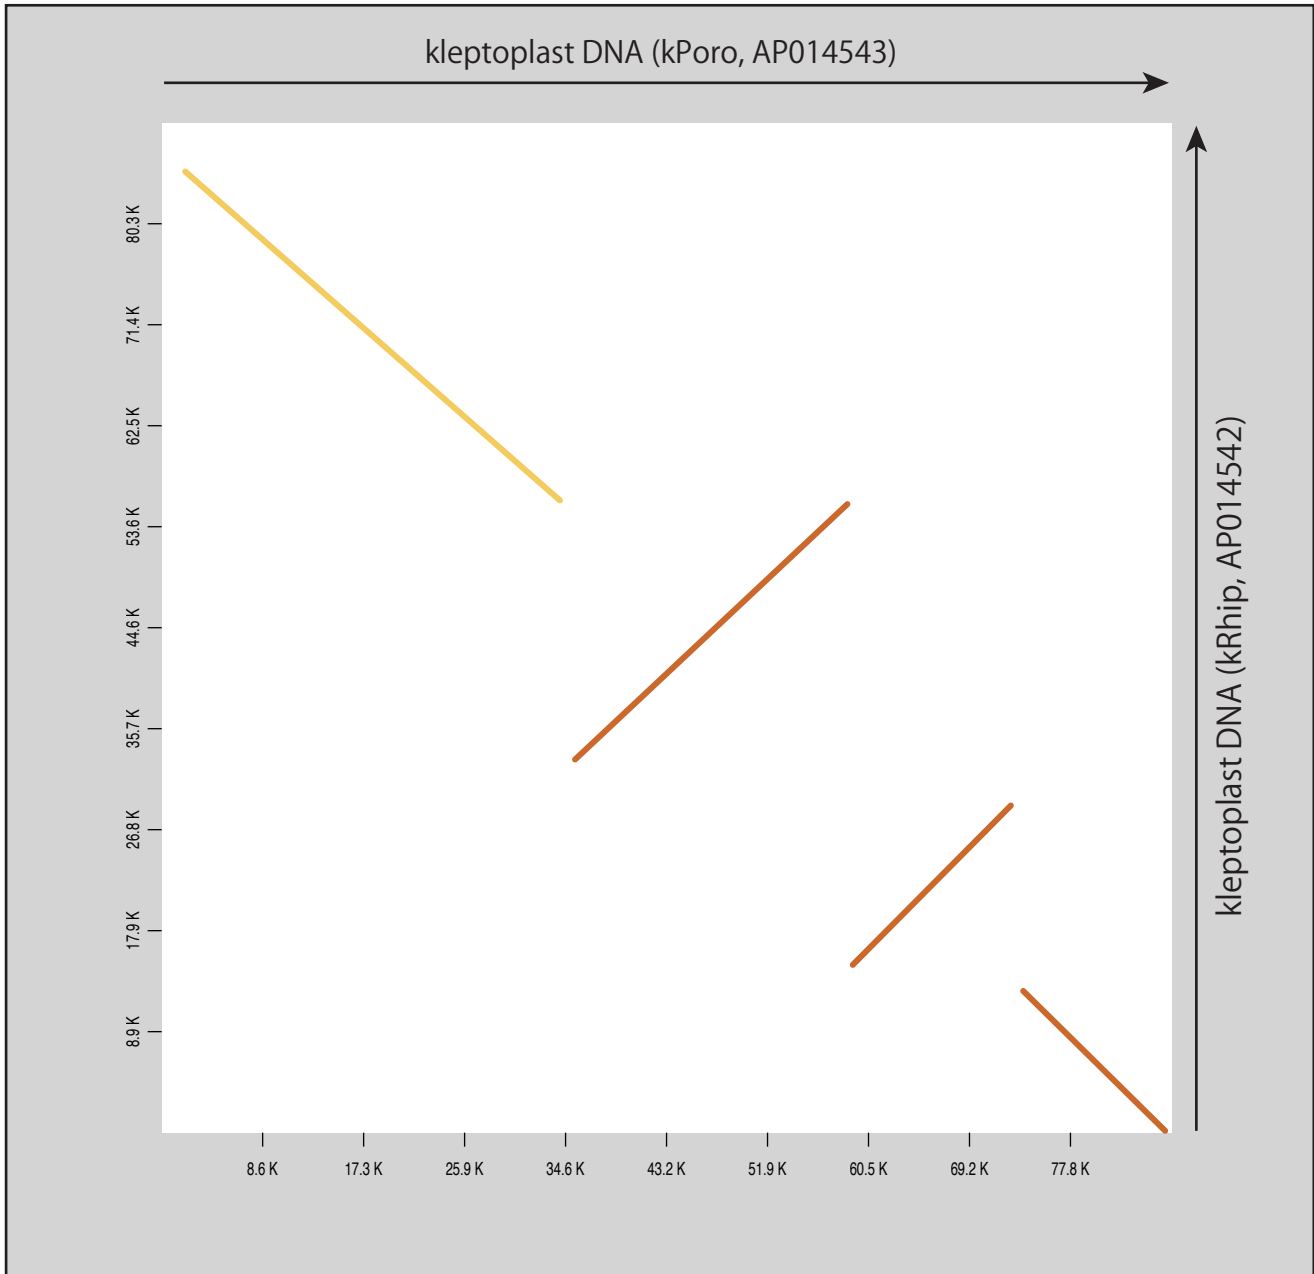

**Supplementary Figure 36** Dot plot of the two referential kleptoplast DNAs. Arrows and colors are as in Supplementary Figure 35

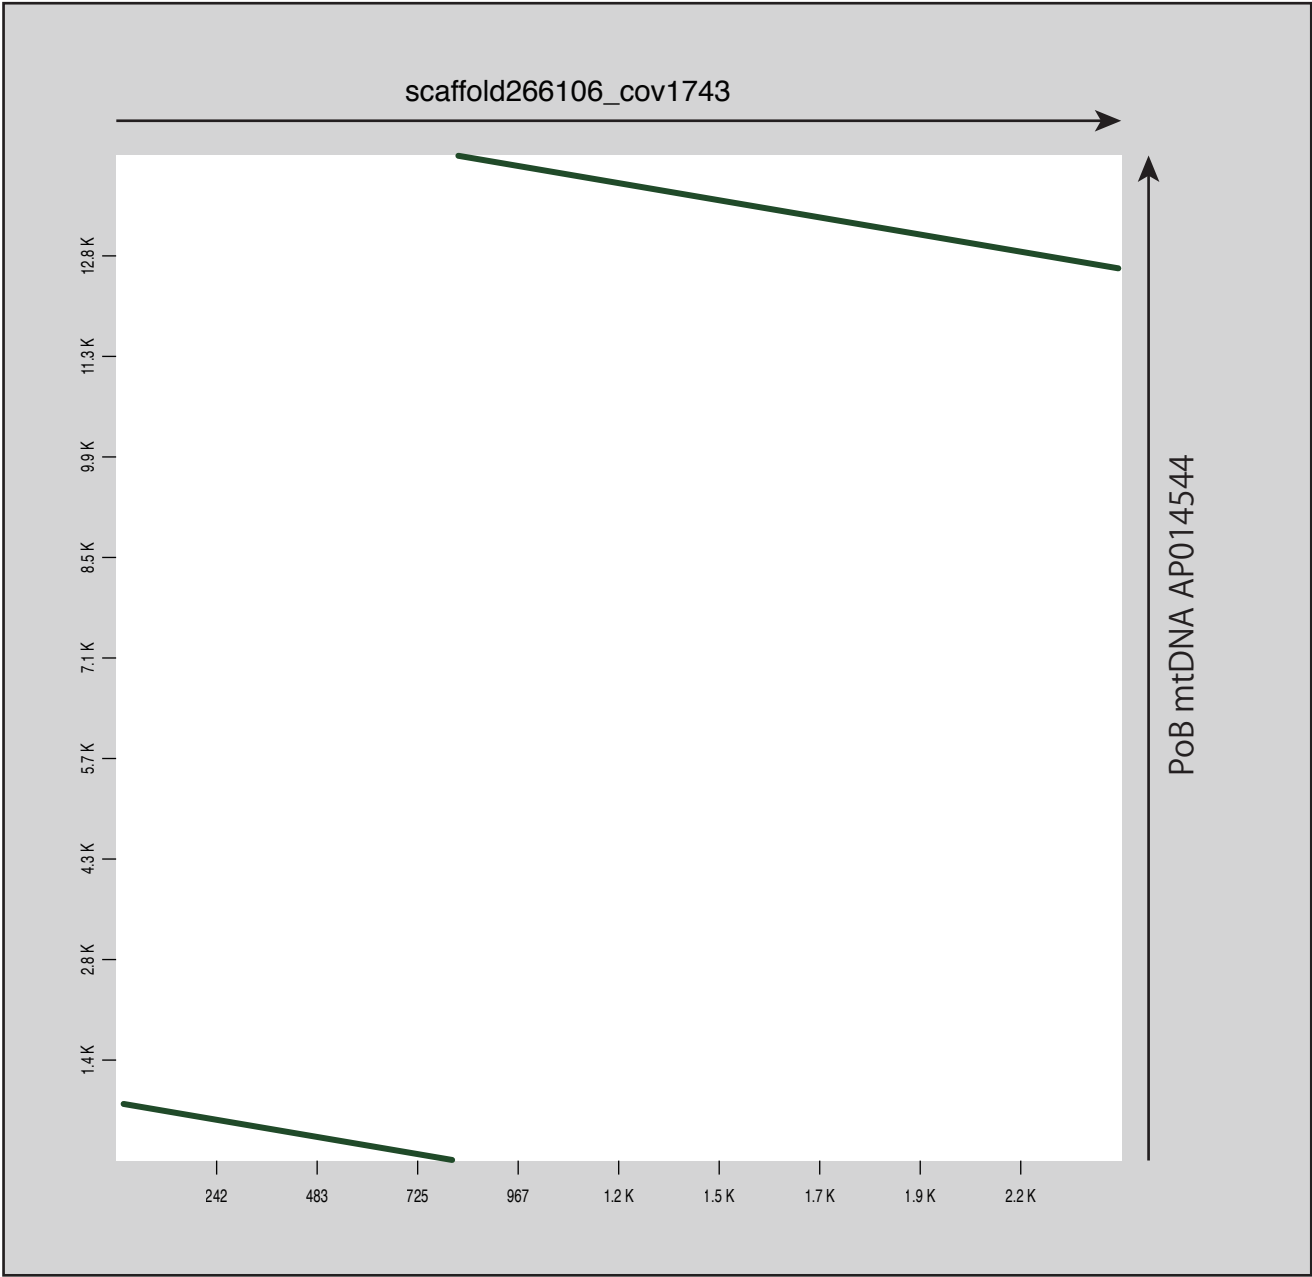

**Supplementary Figure 37** Dot plot of the referential mtDNAs and one scaffold determined as mtDNA sequence. Arrows and colors are as in Supplementary Figure 35.

**Supplementary Table 1** Fv/Fm and oxygen generation activity of *P. ocellatus* type black

Raw data were submitted to FigShare (DOI 10.6084/m9.figshare.12301865). ND, no data.

| Individual ID | Species                        | Days of starvation | Fv/Fm | Oxygen generation rate (pgO <sub>2</sub> /hour/individual) |       |                      |
|---------------|--------------------------------|--------------------|-------|------------------------------------------------------------|-------|----------------------|
|               |                                |                    |       | Dark                                                       | Light | Gross photosynthesis |
| ID1           | <i>P. ocellatus</i> type black | 38                 | 0.681 | -44.2                                                      | 65.0  | 109.2                |
| ID2           | <i>P. ocellatus</i> type black | 38                 | 0.690 | -26.5                                                      | 16.3  | 42.8                 |
| ID3           | <i>P. ocellatus</i> type black | 38                 | 0.677 | -38.3                                                      | 40.8  | 79.2                 |
| ID4           | <i>P. ocellatus</i> type black | 109                | 0.567 | -35.5                                                      | 1.0   | 36.5                 |
| ID5           | <i>P. ocellatus</i> type black | 110                | 0.607 | -21.6                                                      | -3.3  | 18.3                 |
| ID6           | <i>P. ocellatus</i> type black | 110                | 0.643 | -27.8                                                      | 3.8   | 31.5                 |
| Habo1         | <i>H. borneensis</i>           | ND                 | 0.756 | ND                                                         | ND    | ND                   |
| Habo2         | <i>H. borneensis</i>           | ND                 | 0.744 | ND                                                         | ND    | ND                   |
| Habo2         | <i>H. borneensis</i>           | ND                 | 0.734 | ND                                                         | ND    | ND                   |

**Supplementary Table 2** The longevity of starved *Plakobranthus ocellatus* type black.

| Sample ID | Incubation condition | Longevity (Days) |
|-----------|----------------------|------------------|
| D1        | Dark                 | 145              |
| D2        | Dark                 | 150              |
| D3        | Dark                 | 150              |
| D4        | Dark                 | 165              |
| D5        | Dark                 | 165              |
| LD1       | Light/Dark           | 165              |
| LD2       | Light/Dark           | 173              |
| LD3       | Light/Dark           | 204              |
| LD4       | Light/Dark           | 204              |
| LD5       | Light/Dark           | 237              |



**Supplementary Table 3** Plastidial DNAs for the kpDNA gene composition comparison.

Taxon. V, Viridiplantae; R, Rhodophyta; H, Heterokonta; U, Ulvophyceae; C, Chlorophyceae; B, Bryopsidles

Summary of the sequenced raw data was submitted to FigShare (DOI 10.6084/m9.figshare.12301277)

| Species name                     | Abbreviation<br>in figures | Taxon |   |   | Plastid genome<br>(RefSeq ID) | cpDNA size<br>(bp) | Chloroplast recipients         |
|----------------------------------|----------------------------|-------|---|---|-------------------------------|--------------------|--------------------------------|
| <i>Bryopsis hypnoides</i>        | Brhy                       | V     | U | B | NC_013359.1                   | 153,429            | <i>Elysia marginata</i>        |
| <i>Bryopsis plumosa</i>          | Brpl                       | V     | U | B | NC_026795.1                   | 106,859            |                                |
| <i>Bryopsis</i> sp. HV04063      | Brsp                       | V     | U | B | NC_037363.1                   | 100,655            |                                |
| <i>Halimeda borneensis</i>       | Habo                       | V     | U | B | AP_012291.1                   | 86,483             | <i>Plakobranthus ocellatus</i> |
| <i>Caulerpa cliftonii</i>        | Cacl                       | V     | U | B | NC_031368.1                   | 131,135            |                                |
| <i>Caulerpa manorensis</i>       | Cama                       | V     | U | B | NC_037367.1                   | 140,597            |                                |
| <i>Caulerpa racemosa</i>         | Cara                       | V     | U | B | NC_032042.1                   | 176,522            |                                |
| <i>Caulerpa lentillifera</i>     | Cale                       | V     | U | B | NC_039377.1                   | 119,402            |                                |
| <i>Chlorodesmis fastigiata</i>   | Chfa                       | V     | U | B | NC_037364.1                   | 88,592             |                                |
| <i>Codium decortcatum</i>        | Code                       | V     | U | B | NC_032043.1                   | 91,509             |                                |
| <i>Codium</i> sp. 'arenicola'    | Cosp                       | V     | U | B | NC_037366.1                   | 83,933             |                                |
| <i>Derbesia</i> sp. WEST4838     | Desp                       | V     | U | B | NC_031367.1                   | 115,765            |                                |
| <i>Lambia antarctica</i>         | Laan                       | V     | U | B | NC_032284.1                   | 104,098            |                                |
| <i>Rhipilia penicilloides</i>    | Rhpe                       | V     | U | B | NC_037365.1                   | 105,774            |                                |
| <i>Tydemania expeditionis</i>    | Tyex                       | V     | U | B | NC_026796.1                   | 105,200            |                                |
| <i>Chlamydomonas reinhardtii</i> | Chre                       | V     | C |   | NC_005353.1                   | 203,828            |                                |
| <i>Cyanidioschyzon merolae</i>   | Cyme                       | R     |   |   | NC_004799.1                   | 149,987            |                                |
| <i>Vaucheria litorea</i>         | Vali                       | H     |   |   | NC_011600.1                   | 115,341            | <i>Elysia chlorotica</i>       |



**Supplementary Table 5** Assembly statistics of *de novo* RNA-seq of donor algae

Trinity assemblies, *de novo* RNA assemblies clustered by CD-Hit (c=0.95). All models, constructed gene models from Trinity assemblies by Transdecoder. Viridiplantal, Viridiplantal genes identified by MEGAN analysis. NA, not analyzed. Summary of the sequenced raw data was submitted to FigShare (DOI, 10.6084/m9.figshare.12301277).

|                            | Number<br>of<br>models | Averaged<br>length<br>(bp) | Hit models with BUSCO (total BUSCO = 303) |     |                 |     |            |     |         |    |        |     |    |
|----------------------------|------------------------|----------------------------|-------------------------------------------|-----|-----------------|-----|------------|-----|---------|----|--------|-----|----|
|                            |                        |                            | Complete                                  |     | Complete        |     | Fragmented |     | Missing |    |        |     |    |
|                            |                        |                            | Complete                                  |     | single-<br>copy |     | duplicated |     | BUSCOs  |    | BUSCOs |     |    |
|                            |                        |                            | #                                         | %   | #               | %   | #          | %   | #       | %  | #      | %   |    |
| <i>Halimeda borneensis</i> |                        |                            |                                           |     |                 |     |            |     |         |    |        |     |    |
| Trinity assemblies         | 24,218                 | 1717                       | NA                                        | NA  | NA              | NA  | NA         | NA  | NA      | NA | NA     | NA  | NA |
| All models                 | 26,652                 | 1042                       | 262                                       | 86% | 130             | 43% | 132        | 44% | 16      | 5% | 25     | 8%  |    |
| Viridiplantal              | 11,629                 | NA                         | 214                                       | 71% | 106             | 35% | 108        | 36% | 17      | 6% | 72     | 24% |    |
| -----                      |                        |                            |                                           |     |                 |     |            |     |         |    |        |     |    |
| <i>Bryopsis hypnoides</i>  |                        |                            |                                           |     |                 |     |            |     |         |    |        |     |    |
| Trinity assemblies         | 46,039                 | 875                        | NA                                        | NA  | NA              | NA  | NA         | NA  | NA      | NA | NA     | NA  | NA |
| All models                 | 24,127                 | 1002                       | 281                                       | 93% | 247             | 82% | 34         | 11% | 10      | 3% | 12     | 4%  |    |
| Viridiplantal              | 8630                   | NA                         | 226                                       | 75% | 209             | 69% | 17         | 6%  | 13      | 4% | 64     | 21% |    |

## Supplementary Table 6 Algal genes used for referential query (A614 dataset)

Raw data were submitted to FigShare (DOI 10.6084/m9.figshare.12318947)

| Species                   | Gene model ID        | Product name                                                 |
|---------------------------|----------------------|--------------------------------------------------------------|
| <i>Halimeda bomeensis</i> | c10130_q1_i1 m.13140 | Chlorophyll a-b binding protein, chloroplastic               |
| <i>Halimeda bomeensis</i> | c10130_q1_i2 m.13155 | Chlorophyll a-b binding protein, chloroplastic               |
| <i>Halimeda bomeensis</i> | c10139_q1_i1 m.13200 | Photosystem II manganese                                     |
| <i>Halimeda bomeensis</i> | c10139_g1_i3 m.13209 | Photosystem II manganese                                     |
| <i>Halimeda bomeensis</i> | c10202_g1_i1 m.13618 | PsbP domain-OEC23 like protein                               |
| <i>Halimeda bomeensis</i> | c10202_q1_i2 m.13631 | PsbP domain-OEC23 like protein                               |
| <i>Halimeda bomeensis</i> | c10202_q1_i3 m.13644 | PsbP domain-OEC23 like protein                               |
| <i>Halimeda bomeensis</i> | c10359_g1_i1 m.14901 | Low PSII Accumulation 3                                      |
| <i>Halimeda bomeensis</i> | c10360_q1_i1 m.14907 | Photosystem II reaction center PsbP family protein           |
| <i>Halimeda bomeensis</i> | c10604_q1_i1 m.16759 | Chlorophyll a-b binding protein, chloroplastic               |
| <i>Halimeda bomeensis</i> | c10621_g1_i1 m.16844 | Photosystem I reaction center subunit XI                     |
| <i>Halimeda bomeensis</i> | c10633_q1_i1 m.16952 | Photosyst                                                    |
| <i>Halimeda bomeensis</i> | c10633_q1_i2 m.16956 | Photosystem II D1 processing protein PSB27-H2, chloroplastic |
| <i>Halimeda bomeensis</i> | c10633_q1_i3 m.16958 | Photosystem II D1 processing protein PSB27-H2, chloroplastic |
| <i>Halimeda bomeensis</i> | c10644_g1_i1 m.17084 | Ferredoxin-thioredoxin reductase, variable chain             |
| <i>Halimeda bomeensis</i> | c10644_q1_i2 m.17095 | Ferredoxin-thioredoxin reductase, variable chain             |
| <i>Halimeda bomeensis</i> | c10644_q1_i5 m.17106 | Ferredoxin-thioredoxin reductase, variable chain             |
| <i>Halimeda bomeensis</i> | c10644_g1_i7 m.17117 | Ferredoxin-thioredoxin reductase, variable chain             |
| <i>Halimeda bomeensis</i> | c10806_q1_i1 m.18764 | Chlorophyll a-b binding protein, chloroplastic               |
| <i>Halimeda bomeensis</i> | c10867_q1_i1 m.19289 | PsaO                                                         |
| <i>Halimeda bomeensis</i> | c10867_q1_i2 m.19309 | PsaO                                                         |
| <i>Halimeda bomeensis</i> | c10967_g1_i1 m.20274 | Protein Thf1                                                 |
| <i>Halimeda bomeensis</i> | c11000_q1_i1 m.20583 | Chlorophyll a-b binding protein, chloroplastic               |
| <i>Halimeda bomeensis</i> | c11000_q1_i2 m.20597 | Chlorophyll a-b binding protein, chloroplastic               |
| <i>Halimeda bomeensis</i> | c11000_g1_i3 m.20612 | Chlorophyll a-b binding protein, chloroplastic               |
| <i>Halimeda bomeensis</i> | c11000_q1_i4 m.20625 | Chlorophyll a-b binding protein, chloroplastic               |
| <i>Halimeda bomeensis</i> | c11205_q1_i1 m.22907 | Mg-protoporphyrin IX chelatase                               |
| <i>Halimeda bomeensis</i> | c11205_q1_i3 m.22926 | Mg-protoporphyrin IX chelatase                               |
| <i>Halimeda bomeensis</i> | c11205_g1_i5 m.22942 | Mg-protoporphyrin IX chelatase                               |
| <i>Halimeda bomeensis</i> | c11556_q1_i1 m.27176 | Photosystem II reaction center W protein                     |
| <i>Halimeda bomeensis</i> | c11750_q1_i1 m.30081 | Geranylgeranyl reductase                                     |
| <i>Halimeda bomeensis</i> | c11812_g2_i1 m.31052 | Photosystem II reaction center PsbP family protein           |
| <i>Halimeda bomeensis</i> | c11838_g6_i1 m.31607 | Chlorophyll a-b binding protein, chloroplastic               |
| <i>Halimeda bomeensis</i> | c11923_q1_i1 m.33202 | Phosphoglycerate kinase                                      |
| <i>Halimeda bomeensis</i> | c11923_g1_i2 m.33212 | Phosphoglycerate kinase                                      |
| <i>Halimeda bomeensis</i> | c11923_g1_i3 m.33221 | Phosphoglycerate kinase                                      |
| <i>Halimeda bomeensis</i> | c11992_g1_i1 m.34555 | Chlorophyll a-b binding protein, chloroplastic               |
| <i>Halimeda bomeensis</i> | c11992_q1_i2 m.34572 | Chlorophyll a-b binding protein, chloroplastic               |
| <i>Halimeda bomeensis</i> | c12019_g3_i1 m.35190 | Photosystem II reaction center PsbP family protein           |
| <i>Halimeda bomeensis</i> | c12058_g4_i1 m.36211 | Photosystem II 10 kDa polypeptide, chloroplastic             |
| <i>Halimeda bomeensis</i> | c12063_g1_i2 m.36272 | Proline--tRNA ligase                                         |
| <i>Halimeda bomeensis</i> | c12213_g1_i1 m.39684 | Solanesyl diphosphate synthase                               |
| <i>Halimeda bomeensis</i> | c12285_g1_i1 m.41562 | Photosystem II core complex proteins psbY                    |
| <i>Halimeda bomeensis</i> | c12285_g1_i2 m.41582 | Photosystem II core complex proteins psbY                    |
| <i>Halimeda bomeensis</i> | c12285_g1_i3 m.41600 | Photosystem II core complex proteins psbY                    |
| <i>Halimeda bomeensis</i> | c12285_g1_i4 m.41620 | Photosystem II core complex proteins psbY                    |
| <i>Halimeda bomeensis</i> | c12285_g1_i8 m.41640 | Photosystem II core complex proteins psbY                    |
| <i>Halimeda bomeensis</i> | c12485_g2_i2 m.47159 | Photosystem I reaction center subunit N                      |
| <i>Halimeda bomeensis</i> | c12485_g2_i4 m.47173 | Photosystem I reaction center subunit N                      |
| <i>Halimeda bomeensis</i> | c13873_g1_i1 m.53546 | NmrA-like                                                    |
| <i>Halimeda bomeensis</i> | c14836_g1_i1 m.53851 | Chlorophyll a-b binding protein, chloroplastic               |
| <i>Halimeda bomeensis</i> | c14923_g1_i1 m.53994 | Proton gradient regulation 5                                 |
| <i>Halimeda bomeensis</i> | c15972_g1_i1 m.54474 | Oxygen-evolving enhancer protein 3                           |
| <i>Halimeda bomeensis</i> | c17102_q1_i1 m.54887 | Photosystem I reaction center subunit II                     |
| <i>Halimeda bomeensis</i> | c17135_q1_i1 m.55002 | Photosystem I reaction center subunit III                    |
| <i>Halimeda bomeensis</i> | c17137_g1_i1 m.55006 | Chlorophyll a-b binding protein, chloroplastic               |
| <i>Halimeda bomeensis</i> | c18279_q1_i1 m.55485 | Photosystem II oxygen-evolving enhancer protein 2            |
| <i>Halimeda bomeensis</i> | c2011_g1_i1 m.979    | Photosystem I reaction center subunit V                      |
| <i>Halimeda bomeensis</i> | c2516_g1_i1 m.1178   | Thylakoid lumen protein                                      |

| Species                   | Gene model ID         | Product name                                       |
|---------------------------|-----------------------|----------------------------------------------------|
| <i>Halimeda bomeensis</i> | c2516_q1_i2 m.1181    | Thylakoid lumen protein                            |
| <i>Halimeda bomeensis</i> | c5655_q1_i2 m.2421    | Photosystem II lipoprotein Psb27                   |
| <i>Halimeda bomeensis</i> | c5754_q1_i1 m.2541    | Chlorophyll a-b binding protein, chloroplastic     |
| <i>Halimeda bomeensis</i> | c6345_g1_i1 m.3131    | PsbP-like protein 1                                |
| <i>Halimeda bomeensis</i> | c6345_g1_i2 m.3134    | PsbP-like protein 1                                |
| <i>Halimeda bomeensis</i> | c6657_q1_i1 m.3594    | Chlorophyll a-b binding protein, chloroplastic     |
| <i>Halimeda bomeensis</i> | c6657_q1_i2 m.3603    | Chlorophyll a-b binding protein, chloroplastic     |
| <i>Halimeda bomeensis</i> | c6847_g1_i1 m.3868    | Chlorophyll a-b binding protein, chloroplastic     |
| <i>Halimeda bomeensis</i> | c7852_q1_i1 m.5043    | Photosystem I reaction center subunit VI           |
| <i>Halimeda bomeensis</i> | c7901_q1_i1 m.5169    | Glyceraldehyde-3-phosphate dehydrogenase           |
| <i>Halimeda bomeensis</i> | c8046_g1_i1 m.5446    | Chlorophyll a-b binding protein, chloroplastic     |
| <i>Halimeda bomeensis</i> | c8430_q1_i2 m.6720    | PsbP domain-containing protein 1                   |
| <i>Halimeda bomeensis</i> | c8430_q1_i3 m.6726    | PsbP domain-containing protein 1                   |
| <i>Halimeda bomeensis</i> | c8430_q1_i5 m.6732    | PsbP domain-containing protein 1                   |
| <i>Halimeda bomeensis</i> | c8767_g1_i1 m.7731    | Phosphoribulokinase                                |
| <i>Halimeda bomeensis</i> | c8767_q1_i2 m.7752    | Phosphoribulokinase                                |
| <i>Halimeda bomeensis</i> | c9307_q2_i1 m.9349    | Photosystem I reaction center subunit psaK         |
| <i>Halimeda bomeensis</i> | c9585_g1_i1 m.10690   | Chlorophyll a-b binding protein, chloroplastic     |
| <i>Halimeda bomeensis</i> | c11454_q1_i2 m.25690  | Protein LOW PSII ACCUMULATION 3, chloroplastic     |
| <i>Halimeda bomeensis</i> | c11503_q2_i1 m.26337  | Cytochrome c6                                      |
| <i>Halimeda bomeensis</i> | c11974_q1_i1 m.34152  | Cytochrome b6-f complex iron-sulfur subunit        |
| <i>Halimeda bomeensis</i> | c11974_g1_i2 m.34176  | Cytochrome b6-f complex iron-sulfur subunit        |
| <i>Halimeda bomeensis</i> | c11974_q1_i4 m.34199  | Cytochrome b6-f complex iron-sulfur subunit        |
| <i>Halimeda bomeensis</i> | c12063_q1_i1 m.36256  | Proline--tRNA ligase                               |
| <i>Halimeda bomeensis</i> | c12387_g1_i2 m.44368  | Serine/threonine protein kinase                    |
| <i>Halimeda bomeensis</i> | c12387_g1_i3 m.44382  | Serine/threonine protein kinase                    |
| <i>Halimeda bomeensis</i> | c12387_q1_i4 m.44396  | Serine/threonine protein kinase                    |
| <i>Halimeda bomeensis</i> | c12387_q1_i5 m.44409  | Serine/threonine protein kinase                    |
| <i>Halimeda bomeensis</i> | c12387_g1_i6 m.44423  | Serine/threonine protein kinase                    |
| <i>Halimeda bomeensis</i> | c12387_g1_i7 m.44437  | Serine/threonine protein kinase                    |
| <i>Halimeda bomeensis</i> | c12482_q1_i1 m.47079  | Photosystem II reaction center PsbP family protein |
| <i>Halimeda bomeensis</i> | c18307_g1_i1 m.55531  | Beta-propeller domain-containing protein           |
| <i>Halimeda bomeensis</i> | c6105_g1_i1 m.2865    | Tetratricopeptide repeat                           |
| <i>Halimeda bomeensis</i> | c9439_g1_i1 m.10060   | Ribulose biphosphate carboxylase small chain       |
| <i>Halimeda bomeensis</i> | c9439_g1_i2 m.10069   | Ribulose biphosphate carboxylase small chain       |
| <i>Halimeda bomeensis</i> | c10309_g1_i3 m.14470  | Peptidyl-prolyl cis-trans isomerase                |
| <i>Halimeda bomeensis</i> | c11984_g1_i1 m.34368  | NA                                                 |
| <i>Halimeda bomeensis</i> | c11984_g1_i2 m.34379  | NA                                                 |
| <i>Halimeda bomeensis</i> | c11984_g1_i4 m.34390  | NA                                                 |
| <i>Halimeda bomeensis</i> | c11984_g1_i5 m.34401  | NA                                                 |
| <i>Halimeda bomeensis</i> | c11984_g1_i6 m.34411  | NA                                                 |
| <i>Halimeda bomeensis</i> | c11984_g1_i7 m.34423  | NA                                                 |
| <i>Halimeda bomeensis</i> | c12550_g1_i1 m.49400  | Peptidase M50 family protein                       |
| <i>Halimeda bomeensis</i> | c12550_g1_i11 m.49438 | Peptidase M50 family protein                       |
| <i>Halimeda bomeensis</i> | c12550_g1_i3 m.49410  | Peptidase M50 family protein                       |
| <i>Halimeda bomeensis</i> | c12550_g1_i4 m.49420  | Peptidase M50 family protein                       |
| <i>Halimeda bomeensis</i> | c12550_g1_i7 m.49429  | Peptidase M50 family protein                       |
| <i>Halimeda bomeensis</i> | c1596_g1_i1 m.730     | Photosystem II manganese                           |
| <i>Halimeda bomeensis</i> | c5758_g1_i1 m.2549    | Ultraviolet-B-repressible protein                  |
| <i>Halimeda bomeensis</i> | c5758_g1_i2 m.2555    | Ultraviolet-B-repressible protein                  |
| <i>Halimeda bomeensis</i> | c6451_g1_i1 m.3322    | Expressed protein                                  |
| <i>Halimeda bomeensis</i> | c8027_g1_i1 m.5432    | Chlorophyll a-b binding protein, chloroplastic     |
| <i>Halimeda bomeensis</i> | c8289_g1_i1 m.6257    | Photosystem II reaction center PsbP family protein |
| <i>Halimeda bomeensis</i> | c8289_g1_i2 m.6265    | Photosystem II reaction center PsbP family protein |
| <i>Halimeda bomeensis</i> | c8782_g1_i1 m.7817    | Chlorophyll a-b binding protein, chloroplastic     |
| <i>Halimeda bomeensis</i> | c10309_g1_i2 m.14469  | Peptidyl-prolyl cis-trans isomerase                |
| <i>Halimeda bomeensis</i> | c10611_q1_i1 m.16776  | VKOR-domain-containing protein                     |
| <i>Halimeda bomeensis</i> | c10611_g1_i2 m.16777  | Vitamin K epoxide reductase                        |
| <i>Halimeda bomeensis</i> | c10632_g1_i1 m.16945  | Protein CHLOROPLAST ENHANCING STRESS TOLERANCE     |
| <i>Halimeda bomeensis</i> | c11124_q1_i1 m.22046  | Protein low psii accumulation 2, chloroplastic     |
| <i>Halimeda bomeensis</i> | c11503_q2_i1 m.26335  | Cytochrome c6                                      |
| <i>Halimeda bomeensis</i> | c11580_q1_i2 m.27450  | FAN protein                                        |

| Species                   | Gene model ID                    | Product name                                       |
|---------------------------|----------------------------------|----------------------------------------------------|
| <i>Halimeda bomeensis</i> | c11580_q1_i5 m.27457             | FAN protein                                        |
| <i>Halimeda bomeensis</i> | c11580_q1_i6 m.27466             | FAN protein                                        |
| <i>Halimeda bomeensis</i> | c12063_q1_i2 m.36277             | Proline--tRNA ligase                               |
| <i>Halimeda bomeensis</i> | c12073_g1_i1 m.36486             | Acetylglucosaminyltransferase                      |
| <i>Halimeda bomeensis</i> | c12354_g1_i2 m.43524             | Phenylalanine-tma alpha subunit                    |
| <i>Halimeda bomeensis</i> | c12405_q1_i2 m.44746             | LGP2                                               |
| <i>Halimeda bomeensis</i> | c12563_q1_i1 m.49896             | {ECO:0000313 EMBL:BAD31802.1};                     |
| <i>Halimeda bomeensis</i> | c12563_g1_i2 m.49907             | {ECO:0000313 EMBL:BAD31802.1};                     |
| <i>Halimeda bomeensis</i> | c12563_q1_i3 m.49920             | {ECO:0000313 EMBL:BAD31802.1};                     |
| <i>Halimeda bomeensis</i> | c12563_q1_i5 m.49932             | {ECO:0000313 EMBL:BAD31802.1};                     |
| <i>Halimeda bomeensis</i> | c12563_g1_i7 m.49946             | {ECO:0000313 EMBL:BAD31802.1};                     |
| <i>Halimeda bomeensis</i> | c13752_q1_i1 m.53423             | Expressed protein                                  |
| <i>Halimeda bomeensis</i> | c1506_q1_i1 m.633                | Photosystem II reaction center PsbP family protein |
| <i>Halimeda bomeensis</i> | c6424_q1_i1 m.3282               | Carbohydrate kinase-like protein                   |
| <i>Halimeda bomeensis</i> | c7971_g1_i1 m.5294               | Ran-binding protein                                |
| <i>Halimeda bomeensis</i> | c8355_q1_i1 m.6553               | Photosystem I reaction centre subunit N            |
| <i>Halimeda bomeensis</i> | c8355_q1_i2 m.6560               | Photosystem I reaction centre subunit N            |
| <i>Halimeda bomeensis</i> | c9173_g3_i1 m.8728               | Calmodulin-binding protein, putative, expressed    |
| <i>Halimeda bomeensis</i> | c11016_q1_i1 m.20733             | BnaA06q31770D protein                              |
| <i>Halimeda bomeensis</i> | c11016_q1_i2 m.20745             | BnaA06q31770D protein                              |
| <i>Halimeda bomeensis</i> | c11485_q1_i1 m.26071             | Protein translocase subunit SecA                   |
| <i>Halimeda bomeensis</i> | c11485_g1_i2 m.26080             | Protein translocase subunit SecA                   |
| <i>Halimeda bomeensis</i> | c11051_q1_i1 m.21180             | DnaJ-like protein                                  |
| <i>Halimeda bomeensis</i> | c11051_q1_i2 m.21188             | DnaJ-like protein                                  |
| <i>Halimeda bomeensis</i> | c11051_g1_i3 m.21196             | DnaJ-like protein                                  |
| <i>Halimeda bomeensis</i> | c11074_g1_i2 m.21498             | Chloroplast precursor;                             |
| <i>Halimeda bomeensis</i> | c11074_q1_i3 m.21508             | Chloroplast precursor;                             |
| <i>Halimeda bomeensis</i> | c11129_q3_i1 m.22090             | Rna binding protein                                |
| <i>Halimeda bomeensis</i> | c11459_g1_i1 m.25719             | Kinase-like protein                                |
| <i>Halimeda bomeensis</i> | c11683_g1_i10 m.28986            | ABC1 family protein                                |
| <i>Halimeda bomeensis</i> | c11683_q1_i2 m.28884             | ABC1 family protein                                |
| <i>Halimeda bomeensis</i> | c11683_g1_i3 m.28898             | ABC1 family protein                                |
| <i>Halimeda bomeensis</i> | c11683_g1_i6 m.28938             | ABC1 family protein                                |
| <i>Halimeda bomeensis</i> | c11683_g1_i7 m.28949             | ABC1 family protein                                |
| <i>Halimeda bomeensis</i> | c11683_g1_i8 m.28961             | ABC1 family protein                                |
| <i>Halimeda bomeensis</i> | c11683_g1_i9 m.28972             | ABC1 family protein                                |
| <i>Halimeda bomeensis</i> | c11782_q1_i1 m.30630             | Fructose-1,6-bisphosphatase class 1                |
| <i>Halimeda bomeensis</i> | c11919_g1_i1 m.33132             | Rubredoxin                                         |
| <i>Halimeda bomeensis</i> | c11919_g1_i2 m.33137             | Rubredoxin                                         |
| <i>Halimeda bomeensis</i> | c12485_g2_i2 m.47156             | Fructose-1,6-bisphosphatase class 1                |
| <i>Halimeda bomeensis</i> | c12485_g2_i4 m.47171             | Fructose-1,6-bisphosphatase class 1                |
| <i>Halimeda bomeensis</i> | c12581_g2_i1 m.50422             | BnaA04g03770D protein                              |
| <i>Halimeda bomeensis</i> | c12581_g2_i2 m.50429             | BnaA04g03770D protein                              |
| <i>Halimeda bomeensis</i> | c12581_g2_i3 m.50443             | BnaA04g03770D protein                              |
| <i>Halimeda bomeensis</i> | c12581_g2_i4 m.50463             | BnaA04g03770D protein                              |
| <i>Halimeda bomeensis</i> | c12581_g2_i5 m.50506             | BnaA04g03770D protein                              |
| <i>Halimeda bomeensis</i> | c18274_g1_i1 m.55476             | Ferredoxin--NADP reductase                         |
| <i>Halimeda bomeensis</i> | c2353_g1_i1 m.1136               | Rieske                                             |
| <i>Halimeda bomeensis</i> | c7052_g1_i1 m.4120               | Gdt1-like protein chloroplastic-like               |
| <i>Halimeda bomeensis</i> | c7288_g1_i1 m.4372               | Thylakoid luminal protein                          |
| <i>Halimeda bomeensis</i> | c7288_g1_i2 m.4374               | Thylakoid luminal 16.5 kDa protein                 |
| <i>Halimeda bomeensis</i> | c7288_g1_i3 m.4376               | Thylakoid luminal protein                          |
| <i>Halimeda bomeensis</i> | c7288_g1_i3 m.4375               | Thylakoid luminal protein                          |
| <i>Halimeda bomeensis</i> | c9535_g1_i1 m.10380              | Retinol dehydrogenase 12                           |
| <i>Halimeda bomeensis</i> | c9596_g1_i1 m.10738              | Fatty-acid desaturase                              |
| <i>Bryopsis hypnoides</i> | TRINITY_DN10574_c0_g1_i1 m.43562 | Chlorophyll a-b binding protein, chloroplastic     |
| <i>Bryopsis hypnoides</i> | TRINITY_DN10651_c0_q1_i1 m.35752 | Chlorophyll a-b binding protein, chloroplastic     |
| <i>Bryopsis hypnoides</i> | TRINITY_DN11783_c0_g1_i1 m.53042 | Photosystem II lipoprotein Psb27                   |
| <i>Bryopsis hypnoides</i> | TRINITY_DN12481_c0_g2_i1 m.11453 | Thylakoid lumen protein                            |
| <i>Bryopsis hypnoides</i> | TRINITY_DN13502_c0_q2_i1 m.39188 | Photosystem II reaction center PsbP family protein |
| <i>Bryopsis hypnoides</i> | TRINITY_DN13612_c0_q1_i1 m.40084 | Chlorophyll a-b binding protein, chloroplastic     |
| <i>Bryopsis hypnoides</i> | TRINITY_DN13612_c0_q1_i2 m.40089 | Chlorophyll a-b binding protein, chloroplastic     |

| Species                   | Gene model ID                    | Product name                                                     |
|---------------------------|----------------------------------|------------------------------------------------------------------|
| <i>Bryopsis hypnoides</i> | TRINITY_DN13742_c1_q1_i3 m.46210 | Photosystem II reaction center PsbP family protein               |
| <i>Bryopsis hypnoides</i> | TRINITY_DN13742_c1_q1_i6 m.46216 | Photosystem II reaction center PsbP family protein               |
| <i>Bryopsis hypnoides</i> | TRINITY_DN14368_c0_q2_i1 m.13752 | Photosystem II reaction center PsbP family protein               |
| <i>Bryopsis hypnoides</i> | TRINITY_DN14730_c2_g1_i1 m.30859 | Luminal PsbP-like protein                                        |
| <i>Bryopsis hypnoides</i> | TRINITY_DN15063_c0_g1_i1 m.27665 | Photosystem II repair protein PSB27-H1, chloroplastic            |
| <i>Bryopsis hypnoides</i> | TRINITY_DN15063_c0_q1_i2 m.27668 | Photosystem II repair protein PSB27-H1, chloroplastic            |
| <i>Bryopsis hypnoides</i> | TRINITY_DN15534_c2_q3_i1 m.12096 | Chlorophyll a-b binding protein, chloroplastic                   |
| <i>Bryopsis hypnoides</i> | TRINITY_DN15534_c2_g3_i2 m.12100 | Chlorophyll a-b binding protein, chloroplastic                   |
| <i>Bryopsis hypnoides</i> | TRINITY_DN15534_c2_q3_i3 m.12102 | Chlorophyll a-b binding protein, chloroplastic                   |
| <i>Bryopsis hypnoides</i> | TRINITY_DN15534_c2_q4_i1 m.12103 | Chlorophyll a-b binding protein, chloroplastic                   |
| <i>Bryopsis hypnoides</i> | TRINITY_DN15534_c2_q4_i4 m.12104 | Chlorophyll a-b binding protein, chloroplastic                   |
| <i>Bryopsis hypnoides</i> | TRINITY_DN15534_c2_q4_i5 m.12106 | Chlorophyll a-b binding protein, chloroplastic                   |
| <i>Bryopsis hypnoides</i> | TRINITY_DN16093_c0_q1_i1 m.54248 | Magnesium-protoporphyrin IX monomethyl ester [oxidative] cyclase |
| <i>Bryopsis hypnoides</i> | TRINITY_DN16153_c0_q1_i1 m.33391 | Photosystem I reaction center subunit V                          |
| <i>Bryopsis hypnoides</i> | TRINITY_DN16170_c0_g1_i1 m.33317 | Chlorophyll a-b binding protein, chloroplastic                   |
| <i>Bryopsis hypnoides</i> | TRINITY_DN16179_c0_q1_i1 m.33383 | Protein Thf1                                                     |
| <i>Bryopsis hypnoides</i> | TRINITY_DN16266_c0_q1_i1 m.18608 | Chlorophyll a-b binding protein, chloroplastic                   |
| <i>Bryopsis hypnoides</i> | TRINITY_DN16357_c0_g1_i1 m.1070  | Chlorophyll a-b binding protein, chloroplastic                   |
| <i>Bryopsis hypnoides</i> | TRINITY_DN20081_c0_q1_i1 m.33879 | Photosystem II reaction center W protein                         |
| <i>Bryopsis hypnoides</i> | TRINITY_DN20083_c0_q1_i1 m.33830 | Chlorophyll a-b binding protein, chloroplastic                   |
| <i>Bryopsis hypnoides</i> | TRINITY_DN20147_c0_q1_i1 m.5646  | Chlorophyll a-b binding protein, chloroplastic                   |
| <i>Bryopsis hypnoides</i> | TRINITY_DN20187_c0_g1_i1 m.5577  | Photosystem I reaction center subunit III                        |
| <i>Bryopsis hypnoides</i> | TRINITY_DN20330_c0_q1_i1 m.9442  | Photosystem II PsbY protein                                      |
| <i>Bryopsis hypnoides</i> | TRINITY_DN20330_c0_q2_i1 m.9443  | Photosystem II PsbY protein                                      |
| <i>Bryopsis hypnoides</i> | TRINITY_DN20330_c0_g3_i1 m.9446  | Photosystem II PsbY protein                                      |
| <i>Bryopsis hypnoides</i> | TRINITY_DN20336_c0_g1_i1 m.9554  | PsbP family protein, expressed                                   |
| <i>Bryopsis hypnoides</i> | TRINITY_DN20517_c0_q1_i1 m.51608 | NmrA family protein                                              |
| <i>Bryopsis hypnoides</i> | TRINITY_DN2379_c0_q1_i1 m.49472  | Photosystem II PsbP protein                                      |
| <i>Bryopsis hypnoides</i> | TRINITY_DN2379_c0_g2_i1 m.49474  | Photosystem II PsbP protein                                      |
| <i>Bryopsis hypnoides</i> | TRINITY_DN23826_c0_g1_i1 m.10436 | Oxygen-evolving enhancer protein 3                               |
| <i>Bryopsis hypnoides</i> | TRINITY_DN23833_c0_q1_i1 m.10470 | Chlorophyll a-b binding protein, chloroplastic                   |
| <i>Bryopsis hypnoides</i> | TRINITY_DN23994_c0_g1_i1 m.3984  | Photosystem II oxygen-evolving enhancer protein 2                |
| <i>Bryopsis hypnoides</i> | TRINITY_DN24082_c0_g1_i1 m.43185 | Photosystem I reaction center subunit N                          |
| <i>Bryopsis hypnoides</i> | TRINITY_DN2631_c0_g1_i1 m.41720  | Photosystem I subunit VI                                         |
| <i>Bryopsis hypnoides</i> | TRINITY_DN27976_c0_g1_i1 m.61072 | Photosystem II oxygen-evolving enhancer protein 2                |
| <i>Bryopsis hypnoides</i> | TRINITY_DN31326_c0_g1_i1 m.12617 | Chlorophyll a-b binding protein, chloroplastic                   |
| <i>Bryopsis hypnoides</i> | TRINITY_DN31408_c0_g1_i1 m.38740 | Photosystem I reaction center subunit II                         |
| <i>Bryopsis hypnoides</i> | TRINITY_DN32025_c0_g1_i1 m.57757 | Photosystem II 10 kDa polypeptide, chloroplastic                 |
| <i>Bryopsis hypnoides</i> | TRINITY_DN35043_c0_g1_i1 m.48937 | Photosystem II reaction center Psb28 protein                     |
| <i>Bryopsis hypnoides</i> | TRINITY_DN35053_c0_g1_i1 m.48782 | Geranylgeranyl reductase                                         |
| <i>Bryopsis hypnoides</i> | TRINITY_DN35055_c0_g1_i1 m.48902 | Photosystem II 10 kDa polypeptide, chloroplastic                 |
| <i>Bryopsis hypnoides</i> | TRINITY_DN35100_c0_g1_i1 m.17347 | Photosystem I reaction center subunit XI                         |
| <i>Bryopsis hypnoides</i> | TRINITY_DN35130_c1_g1_i1 m.17373 | Photosystem II manganese                                         |
| <i>Bryopsis hypnoides</i> | TRINITY_DN35653_c0_g1_i1 m.44671 | Photosystem II protein                                           |
| <i>Bryopsis hypnoides</i> | TRINITY_DN35724_c0_g1_i1 m.33570 | Ferredoxin-thioredoxin reductase, variable chain                 |
| <i>Bryopsis hypnoides</i> | TRINITY_DN4505_c0_g1_i1 m.29343  | Photosystem II reaction center PsbP family protein               |
| <i>Bryopsis hypnoides</i> | TRINITY_DN4617_c0_g1_i1 m.51949  | Chlorophyll a-b binding protein, chloroplastic                   |
| <i>Bryopsis hypnoides</i> | TRINITY_DN6205_c0_g2_i1 m.45850  | Solanesyl diphosphate synthase                                   |
| <i>Bryopsis hypnoides</i> | TRINITY_DN6620_c0_g1_i1 m.2960   | Chlorophyll a-b binding protein, chloroplastic                   |
| <i>Bryopsis hypnoides</i> | TRINITY_DN8468_c0_g1_i1 m.48129  | PsbP-like protein                                                |
| <i>Bryopsis hypnoides</i> | TRINITY_DN31415_c0_g1_i1 m.38867 | PsaO                                                             |
| <i>Bryopsis hypnoides</i> | TRINITY_DN11416_c0_g1_i1 m.26546 | Photosystem I reaction center subunit II                         |
| <i>Bryopsis hypnoides</i> | TRINITY_DN11493_c0_g1_i1 m.26677 | Photosystem I reaction center subunit II                         |
| <i>Bryopsis hypnoides</i> | TRINITY_DN11864_c0_g1_i1 m.30228 | Ultraviolet-B-repressible protein                                |
| <i>Bryopsis hypnoides</i> | TRINITY_DN14114_c1_g1_i1 m.1835  | Chlorophyll a-b binding protein, chloroplastic                   |
| <i>Bryopsis hypnoides</i> | TRINITY_DN14715_c0_g2_i1 m.30729 | Chlorophyll a-b binding protein, chloroplastic                   |
| <i>Bryopsis hypnoides</i> | TRINITY_DN15534_c0_q1_i1 m.12095 | Chlorophyll a-b binding protein, chloroplastic                   |
| <i>Bryopsis hypnoides</i> | TRINITY_DN15534_c2_g5_i1 m.12108 | Chlorophyll a-b binding protein, chloroplastic                   |
| <i>Bryopsis hypnoides</i> | TRINITY_DN15534_c5_g1_i1 m.12109 | Chlorophyll a-b binding protein, chloroplastic                   |
| <i>Bryopsis hypnoides</i> | TRINITY_DN15534_c6_q1_i1 m.12112 | Chlorophyll a-b binding protein, chloroplastic                   |
| <i>Bryopsis hypnoides</i> | TRINITY_DN1758_c0_q1_i1 m.7636   | Chlorophyll a-b binding protein, chloroplastic                   |
| <i>Bryopsis hypnoides</i> | TRINITY_DN214_c1_q1_i1 m.18173   | Fibrillin                                                        |

| Species                      | Gene model ID                    | Product name                                                     |
|------------------------------|----------------------------------|------------------------------------------------------------------|
| <i>Bryopsis hypnoides</i>    | TRINITY_DN22385_c0_q1_i1 m.8367  | Chlorophyll a-b binding protein, chloroplastic                   |
| <i>Bryopsis hypnoides</i>    | TRINITY_DN24336_c0_q1_i1 m.35884 | Expressed protein                                                |
| <i>Bryopsis hypnoides</i>    | TRINITY_DN24660_c0_q1_i1 m.27815 | Oxygen-evolving enhancer protein 1                               |
| <i>Bryopsis hypnoides</i>    | TRINITY_DN27886_c0_g1_i1 m.60741 | Chlorophyll a-b binding protein, chloroplastic                   |
| <i>Bryopsis hypnoides</i>    | TRINITY_DN31290_c0_g1_i1 m.823   | Chlorophyll a-b binding protein, chloroplastic                   |
| <i>Bryopsis hypnoides</i>    | TRINITY_DN35106_c0_q1_i1 m.17297 | Oxygen-evolving enhancer protein 3                               |
| <i>Bryopsis hypnoides</i>    | TRINITY_DN35373_c0_q1_i1 m.36129 | NA                                                               |
| <i>Bryopsis hypnoides</i>    | TRINITY_DN407_c0_g2_i1 m.38613   | Chlorophyll a-b binding protein, chloroplastic                   |
| <i>Bryopsis hypnoides</i>    | TRINITY_DN4257_c0_q1_i1 m.50760  | Chlorophyll a-b binding protein, chloroplastic                   |
| <i>Bryopsis hypnoides</i>    | TRINITY_DN4496_c0_q1_i1 m.53876  | Chlorophyll a-b binding protein, chloroplastic                   |
| <i>Bryopsis hypnoides</i>    | TRINITY_DN4811_c0_g1_i1 m.35461  | {ECO:0000313 EMBL:BAD31802.1};                                   |
| <i>Bryopsis hypnoides</i>    | TRINITY_DN6480_c0_q2_i1 m.4826   | Peptidyl-prolyl cis-trans isomerase                              |
| <i>Bryopsis hypnoides</i>    | TRINITY_DN8948_c0_q1_i1 m.24854  | Chlorophyll a-b binding protein, chloroplastic                   |
| <i>Bryopsis hypnoides</i>    | TRINITY_DN16338_c0_q1_i1 m.1033  | Photosystem II reaction center PsbP family protein               |
| <i>Bryopsis hypnoides</i>    | TRINITY_DN2551_c0_g1_i1 m.19119  | Photosystem I reaction centre subunit N                          |
| <i>Bryopsis hypnoides</i>    | TRINITY_DN2551_c0_q2_i1 m.19121  | Photosystem I reaction centre subunit N                          |
| <i>Bryopsis hypnoides</i>    | TRINITY_DN31766_c0_q1_i1 m.38192 | PRC-barrel domain-containing protein                             |
| <i>Bryopsis hypnoides</i>    | TRINITY_DN5199_c0_g1_i1 m.16122  | RNA-binding S4 domain-containing protein                         |
| <i>Bryopsis hypnoides</i>    | TRINITY_DN5199_c0_q2_i1 m.16125  | RNA-binding S4 domain-containing protein                         |
| <i>Bryopsis hypnoides</i>    | TRINITY_DN10061_c0_q1_i1 m.5314  | Kinase-like protein                                              |
| <i>Bryopsis hypnoides</i>    | TRINITY_DN10291_c1_q2_i1 m.39405 | BnaCnnq33260D protein                                            |
| <i>Bryopsis hypnoides</i>    | TRINITY_DN10923_c0_g1_i1 m.44456 | Ribulose biphosphate carboxylase small chain                     |
| <i>Bryopsis hypnoides</i>    | TRINITY_DN11001_c0_q1_i1 m.16529 | Beta-propeller domain-containing protein, methanol dehydrogenase |
| <i>Bryopsis hypnoides</i>    | TRINITY_DN12147_c0_q1_i1 m.22685 | NA                                                               |
| <i>Bryopsis hypnoides</i>    | TRINITY_DN12147_c0_g1_i1 m.22686 | Calcium homeostasis regulator-like protein CHO-R1                |
| <i>Bryopsis hypnoides</i>    | TRINITY_DN12147_c0_g1_i2 m.22687 | BnaC08g26090D protein                                            |
| <i>Bryopsis hypnoides</i>    | TRINITY_DN12147_c0_q1_i3 m.22688 | NA                                                               |
| <i>Bryopsis hypnoides</i>    | TRINITY_DN12147_c0_q1_i4 m.22689 | BnaC08g26090D protein                                            |
| <i>Bryopsis hypnoides</i>    | TRINITY_DN12147_c0_g1_i5 m.22690 | BnaC08g26090D protein                                            |
| <i>Bryopsis hypnoides</i>    | TRINITY_DN12147_c0_g1_i6 m.22692 | Calcium homeostasis regulator-like protein CHO-R1                |
| <i>Bryopsis hypnoides</i>    | TRINITY_DN12147_c0_q1_i6 m.22691 | NA                                                               |
| <i>Bryopsis hypnoides</i>    | TRINITY_DN12378_c0_g1_i1 m.15485 | ABC1 family protein                                              |
| <i>Bryopsis hypnoides</i>    | TRINITY_DN13362_c0_g1_i1 m.31548 | Tetrapeptide repeat                                              |
| <i>Bryopsis hypnoides</i>    | TRINITY_DN13570_c0_g1_i1 m.38915 | Phosphoribulokinase                                              |
| <i>Bryopsis hypnoides</i>    | TRINITY_DN14030_c0_g1_i1 m.9923  | Serine/threonine protein kinase                                  |
| <i>Bryopsis hypnoides</i>    | TRINITY_DN14077_c0_g1_i2 m.9836  | Rna binding protein                                              |
| <i>Bryopsis hypnoides</i>    | TRINITY_DN14101_c1_g1_i1 m.1958  | Glyceraldehyde-3-phosphate dehydrogenase                         |
| <i>Bryopsis hypnoides</i>    | TRINITY_DN14101_c1_g1_i2 m.1964  | Glyceraldehyde-3-phosphate dehydrogenase                         |
| <i>Bryopsis hypnoides</i>    | TRINITY_DN14101_c1_g1_i3 m.1970  | Glyceraldehyde-3-phosphate dehydrogenase                         |
| <i>Bryopsis hypnoides</i>    | TRINITY_DN14450_c0_g1_i1 m.3591  | Thylakoid lumenal 16.5 kDa protein                               |
| <i>Bryopsis hypnoides</i>    | TRINITY_DN14711_c0_g1_i1 m.30440 | DnaJ-like protein                                                |
| <i>Bryopsis hypnoides</i>    | TRINITY_DN15663_c0_g1_i1 m.49965 | Serine protease                                                  |
| <i>Bryopsis hypnoides</i>    | TRINITY_DN15786_c0_g1_i1 m.25788 | Protein translocase subunit SecA                                 |
| <i>Bryopsis hypnoides</i>    | TRINITY_DN16109_c0_g1_i1 m.33463 | Fructose-1,6-bisphosphatase                                      |
| <i>Bryopsis hypnoides</i>    | TRINITY_DN16114_c0_q1_i1 m.33466 | Fructose-1,6-bisphosphatase class 1                              |
| <i>Bryopsis hypnoides</i>    | TRINITY_DN16641_c1_g2_i1 m.37990 | Protochlorophyllide reductase                                    |
| <i>Bryopsis hypnoides</i>    | TRINITY_DN20085_c0_g1_i1 m.33814 | Cytochrome b6-f complex subunit petO, chloroplastic              |
| <i>Bryopsis hypnoides</i>    | TRINITY_DN20328_c0_g1_i1 m.9504  | Cytochrome b6-f complex iron-sulfur subunit                      |
| <i>Bryopsis hypnoides</i>    | TRINITY_DN230_c0_g1_i1 m.18060   | Rieske                                                           |
| <i>Bryopsis hypnoides</i>    | TRINITY_DN2322_c0_g1_i1 m.49283  | BnaC07g26740D protein                                            |
| <i>Bryopsis hypnoides</i>    | TRINITY_DN23884_c0_g1_i1 m.10360 | Ferredoxin-NADP reductase                                        |
| <i>Bryopsis hypnoides</i>    | TRINITY_DN24330_c0_g1_i1 m.35853 | Rubredoxin                                                       |
| <i>Bryopsis hypnoides</i>    | TRINITY_DN2524_c0_g1_i1 m.19259  | Ribulose biphosphate carboxylase small chain                     |
| <i>Bryopsis hypnoides</i>    | TRINITY_DN27786_c0_g1_i1 m.16489 | Mg-protoporphyrin IX chelatase                                   |
| <i>Bryopsis hypnoides</i>    | TRINITY_DN29007_c0_g1_i1 m.23619 | Gdt1-like protein chloroplastic-like                             |
| <i>Bryopsis hypnoides</i>    | TRINITY_DN31298_c0_g1_i1 m.789   | Cytochrome c6                                                    |
| <i>Bryopsis hypnoides</i>    | TRINITY_DN35033_c0_q1_i1 m.48831 | Phosphoglycerate kinase                                          |
| <i>Bryopsis hypnoides</i>    | TRINITY_DN6424_c0_g1_i1 m.4839   | Fatty-acid desaturase                                            |
| <i>Bryopsis hypnoides</i>    | TRINITY_DN9341_c0_g1_i1 m.58406  | Proline-tRNA ligase                                              |
| <i>Bryopsis hypnoides</i>    | TRINITY_DN9539_c0_q3_i1 m.24606  | Low PSII Accumulation 3                                          |
| <i>Caulerpa lentillifera</i> | q1080.t1                         | Chlorophyll a-b binding protein, chloroplastic                   |
| <i>Caulerpa lentillifera</i> | q1190.t1                         | 10 kDa photosystem II polypeptide                                |



| Species                      | Gene model ID | Product name                                                     |
|------------------------------|---------------|------------------------------------------------------------------|
| <i>Caulerpa lentillifera</i> | q1253.t1      | Chlorophyll a-b binding protein, chloroplastic                   |
| <i>Caulerpa lentillifera</i> | q1265.t1      | TRIGALACTOSYLDIACYLGLYCEROL chloroplastic                        |
| <i>Caulerpa lentillifera</i> | q1281.t1      | Protein translocase subunit SecA                                 |
| <i>Caulerpa lentillifera</i> | g1286.t1      | Chlorophyll a-b binding protein, chloroplastic                   |
| <i>Caulerpa lentillifera</i> | g142.t1       | PsbP family protein                                              |
| <i>Caulerpa lentillifera</i> | q1568.t1      | Photosystem II PsbY protein                                      |
| <i>Caulerpa lentillifera</i> | q1660.t1      | Protein containing PDZ domain, a K-box domain, and a TPR         |
| <i>Caulerpa lentillifera</i> | g1724.t1      | Beta-propeller domain-containing protein, methanol dehydrogenase |
| <i>Caulerpa lentillifera</i> | q1771.t1      | Chlorophyll a-b binding protein, chloroplastic                   |
| <i>Caulerpa lentillifera</i> | q1772.t1      | Fatty-acid desaturase                                            |
| <i>Caulerpa lentillifera</i> | g1846.t1      | Chlorophyll a-b binding protein, chloroplastic                   |
| <i>Caulerpa lentillifera</i> | q1916.t1      | Chlorophyll a-b binding protein, chloroplastic                   |
| <i>Caulerpa lentillifera</i> | q2014.t1      | Chlorophyll a-b binding protein, chloroplastic                   |
| <i>Caulerpa lentillifera</i> | q2055.t1      | Phosphoglycerate kinase                                          |
| <i>Caulerpa lentillifera</i> | g2084.t1      | ATP synthase delta-subunit                                       |
| <i>Caulerpa lentillifera</i> | q210.t1       | Photosystem I reaction center subunit III                        |
| <i>Caulerpa lentillifera</i> | q2205.t1      | Oxygen-evolving enhancer protein 3                               |
| <i>Caulerpa lentillifera</i> | g2246.t1      | Phototropin-like, blue light receptor                            |
| <i>Caulerpa lentillifera</i> | q2253.t1      | Solanesyl diphosphate synthase                                   |
| <i>Caulerpa lentillifera</i> | q2269.t1      | Phosphoribulokinase                                              |
| <i>Caulerpa lentillifera</i> | q2337.t1      | Chlorophyll a-b binding protein, chloroplastic                   |
| <i>Caulerpa lentillifera</i> | g2388.t1      | PsaB RNA binding protein                                         |
| <i>Caulerpa lentillifera</i> | q2559.t1      | Adenosine kinase                                                 |
| <i>Caulerpa lentillifera</i> | q263.t1       | Proton gradient regulation 5                                     |
| <i>Caulerpa lentillifera</i> | g2606.t1      | Glyceraldehyde-3-phosphate dehydrogenase                         |
| <i>Caulerpa lentillifera</i> | g2659.t1      | Protein thf1                                                     |
| <i>Caulerpa lentillifera</i> | q2659.t2      | Protein thf1                                                     |
| <i>Caulerpa lentillifera</i> | q278.t1       | Peptidase M50 family protein                                     |
| <i>Caulerpa lentillifera</i> | g2776.t1      | Chlorophyll a-b binding protein, chloroplastic                   |
| <i>Caulerpa lentillifera</i> | g2899.t1      | Photosystem I reaction center subunit XI                         |
| <i>Caulerpa lentillifera</i> | q3011.t1      | Alpha/beta hydrolase                                             |
| <i>Caulerpa lentillifera</i> | g3098.t1      | Photosystem I subunit O                                          |
| <i>Caulerpa lentillifera</i> | g3247.t1      | Photosystem I reaction center subunit N, chloroplastic           |
| <i>Caulerpa lentillifera</i> | g3398.t1      | 2-alkenal reductase                                              |
| <i>Caulerpa lentillifera</i> | g3749.t1      | Rieske                                                           |
| <i>Caulerpa lentillifera</i> | g3875.t1      | Chlorophyll a-b binding protein, chloroplastic                   |
| <i>Caulerpa lentillifera</i> | g3887.t1      | PsbP family protein, expressed                                   |
| <i>Caulerpa lentillifera</i> | g4139.t1      | protein LOW PSII ACCUMULATION 3, chloroplastic                   |
| <i>Caulerpa lentillifera</i> | g4288.t1      | Calvin cycle protein CP12                                        |
| <i>Caulerpa lentillifera</i> | g4299.t1      | Gdt1-like protein chloroplastic-like                             |
| <i>Caulerpa lentillifera</i> | g4382.t1      | Phosphoribulokinase                                              |
| <i>Caulerpa lentillifera</i> | g4641.t1      | Glyceraldehyde-3-phosphate dehydrogenase                         |
| <i>Caulerpa lentillifera</i> | g4647.t1      | Photosystem I reaction center subunit psaK like                  |
| <i>Caulerpa lentillifera</i> | g4687.t1      | Protein thf1                                                     |
| <i>Caulerpa lentillifera</i> | g4748.t1      | Ferredoxin-NADP reductase, chloroplastic                         |
| <i>Caulerpa lentillifera</i> | g4759.t1      | Cytochrome b6-f complex, subunit 8                               |
| <i>Caulerpa lentillifera</i> | g4845.t1      | Cryptochrome DASH                                                |
| <i>Caulerpa lentillifera</i> | g4868.t1      | Chlorophyll a-b binding protein, chloroplastic                   |
| <i>Caulerpa lentillifera</i> | g4899.t1      | Thylakoid lumenal 16.5 kDa protein, chloroplastic                |
| <i>Caulerpa lentillifera</i> | g4915.t1      | Calvin cycle protein CP12                                        |
| <i>Caulerpa lentillifera</i> | g4980.t1      | Cytochrome b6-f complex iron-sulfur subunit                      |
| <i>Caulerpa lentillifera</i> | g5017.t1      | Protein phosphatase 2C-like protein                              |
| <i>Caulerpa lentillifera</i> | g515.t1       | Oxygen evolving enhancer protein 3                               |
| <i>Caulerpa lentillifera</i> | g5197.t1      | Fructose-1,6-bisphosphatase                                      |
| <i>Caulerpa lentillifera</i> | g5265.t1      | Cytochrome c6                                                    |
| <i>Caulerpa lentillifera</i> | g5266.t1      | Chlorophyll a-b binding protein, chloroplastic                   |
| <i>Caulerpa lentillifera</i> | q5300.t1      | 3-beta hydroxysteroid dehydrogenase                              |
| <i>Caulerpa lentillifera</i> | g5362.t1      | protein LOW PSII ACCUMULATION 3, chloroplastic                   |
| <i>Caulerpa lentillifera</i> | g5370.t1      | protein LOW PSII ACCUMULATION 3, chloroplastic                   |
| <i>Caulerpa lentillifera</i> | q5414.t1      | Ferredoxin-thioredoxin reductase, variable chain                 |
| <i>Caulerpa lentillifera</i> | q5430.t1      | Mg-protoporphyrin IX chelatase                                   |
| <i>Caulerpa lentillifera</i> | q5505.t1      | Chlorophyll a-b binding protein, chloroplastic                   |

| Species                          | Gene model ID | Product name                                                     |
|----------------------------------|---------------|------------------------------------------------------------------|
| <i>Caulerpa lentillifera</i>     | q5519.t1      | GTP pyrophosphokinase, (P) <sub>o</sub> Gpp synthetase I         |
| <i>Caulerpa lentillifera</i>     | q566.t1       | Peptidyl-prolyl cis-trans isomerase                              |
| <i>Caulerpa lentillifera</i>     | q5705.t1      | protein EMBRYO SAC DEVELOPMENT ARREST 3, chloroplastic           |
| <i>Caulerpa lentillifera</i>     | g5711.t1      | Geranylgeranyl reductase                                         |
| <i>Caulerpa lentillifera</i>     | g5801.t1      | Photosystem II oxygen-evolving enhancer protein 1                |
| <i>Caulerpa lentillifera</i>     | q5830.t1      | Photosystem I reaction center subunit II like                    |
| <i>Caulerpa lentillifera</i>     | q5970.t1      | Photosystem II reaction center Psb28 protein                     |
| <i>Caulerpa lentillifera</i>     | g5990.t1      | Chlorophyll a-b binding protein, chloroplastic                   |
| <i>Caulerpa lentillifera</i>     | q6009.t1      | Photosystem I reaction center subunit V, chloroplastic           |
| <i>Caulerpa lentillifera</i>     | q609.t1       | PsbP family protein                                              |
| <i>Caulerpa lentillifera</i>     | g618.t1       | ATP synthase delta-subunit                                       |
| <i>Caulerpa lentillifera</i>     | q6308.t1      | Tetratricopeptide repeat                                         |
| <i>Caulerpa lentillifera</i>     | q6445.t2      | Ultraviolet-B-repressible protein                                |
| <i>Caulerpa lentillifera</i>     | q6472.t1      | Photosystem II D1 processing PSB27-chloroplastic isoform X1      |
| <i>Caulerpa lentillifera</i>     | g650.t1       | Bifunctional sensory photoreceptor isoform A                     |
| <i>Caulerpa lentillifera</i>     | q6490.t1      | Photosystem I reaction center subunit VI, chloroplastic          |
| <i>Caulerpa lentillifera</i>     | q6520.t1      | Fatty-acid desaturase                                            |
| <i>Caulerpa lentillifera</i>     | g6521.t1      | Chlorophyll a-b binding protein, chloroplastic                   |
| <i>Caulerpa lentillifera</i>     | q6576.t1      | Kinase-like protein                                              |
| <i>Caulerpa lentillifera</i>     | q6718.t1      | Photosystem II PsbY protein                                      |
| <i>Caulerpa lentillifera</i>     | q6795.t1      | Sn1-specific diacylglycerol lipase beta                          |
| <i>Caulerpa lentillifera</i>     | g6827.t1      | ABC-1 domain-containing protein                                  |
| <i>Caulerpa lentillifera</i>     | q6963.t1      | Photosystem I reaction center subunit II protein                 |
| <i>Caulerpa lentillifera</i>     | q6963.t2      | Photosystem I reaction center subunit II protein                 |
| <i>Caulerpa lentillifera</i>     | g7003.t1      | Ribulose biphosphate carboxylase small chain                     |
| <i>Caulerpa lentillifera</i>     | g7120.t1      | Chlorophyll a-b binding protein, chloroplastic                   |
| <i>Caulerpa lentillifera</i>     | q7280.t1      | Deoxyribodipyrimidine photo-lyase                                |
| <i>Caulerpa lentillifera</i>     | q7280.t2      | Deoxyribodipyrimidine photo-lyase                                |
| <i>Caulerpa lentillifera</i>     | g7370.t1      | Proline--tRNA ligase                                             |
| <i>Caulerpa lentillifera</i>     | g752.t1       | Chlorophyll a-b binding protein, chloroplastic                   |
| <i>Caulerpa lentillifera</i>     | q7488.t1      | Fructose-1,6-bisphosphatase                                      |
| <i>Caulerpa lentillifera</i>     | g7554.t1      | Magnesium-protoporphyrin IX monomethyl ester [oxidative] cyclase |
| <i>Caulerpa lentillifera</i>     | g7662.t1      | Fructose-1,6-bisphosphatase                                      |
| <i>Caulerpa lentillifera</i>     | g7909.t1      | Chlorophyll a-b binding protein, chloroplastic                   |
| <i>Caulerpa lentillifera</i>     | g7934.t1      | Photosystem II oxygen-evolving enhancer protein 2                |
| <i>Caulerpa lentillifera</i>     | g8052.t1      | Deoxyribodipyrimidine photolyase/cryptochrome                    |
| <i>Caulerpa lentillifera</i>     | g8114.t1      | 2-alkenal reductase                                              |
| <i>Caulerpa lentillifera</i>     | g8114.t2      | 2-alkenal reductase                                              |
| <i>Caulerpa lentillifera</i>     | g8157.t1      | Ferritin                                                         |
| <i>Caulerpa lentillifera</i>     | g8216.t1      | Chlorophyll a-b binding protein, chloroplastic                   |
| <i>Caulerpa lentillifera</i>     | g8258.t1      | Thylakoid lumenal 19 kDa chloroplastic                           |
| <i>Caulerpa lentillifera</i>     | g8423.t1      | PsbP family protein                                              |
| <i>Caulerpa lentillifera</i>     | g8497.t1      | Photosystem I reaction center subunit VI, chloroplastic          |
| <i>Caulerpa lentillifera</i>     | g82.t1        | Photosystem II reaction center W protein, chloroplastic          |
| <i>Caulerpa lentillifera</i>     | g894.t1       | Photosystem II S4 domain protein                                 |
| <i>Caulerpa lentillifera</i>     | g898.t1       | Chlorophyll a-b binding protein, chloroplastic                   |
| <i>Caulerpa lentillifera</i>     | g8880.t1      | Ferredoxin--NADP reductase, chloroplastic                        |
| <i>Caulerpa lentillifera</i>     | g8997.t1      | Serine/threonine protein kinase                                  |
| <i>Caulerpa lentillifera</i>     | g9015.t1      | Chlorophyll a-b binding protein, chloroplastic                   |
| <i>Caulerpa lentillifera</i>     | g9107.t1      | Photosystem II oxygen evolving complex                           |
| <i>Caulerpa lentillifera</i>     | g9205.t1      | Cytochrome b6-f complex, subunit 8                               |
| <i>Caulerpa lentillifera</i>     | g9217.t1      | Ribulose biphosphate carboxylase small chain                     |
| <i>Chlamydomonas reinhardtii</i> | A8HNE8        | Geranylgeranyl reductase (EC 1.3.1.-)                            |
| <i>Chlamydomonas reinhardtii</i> | A8HRQ4        | Solanesyl diphosphate synthase (EC 2.5.1.-)                      |
| <i>Chlamydomonas reinhardtii</i> | A8HTY7        | Ser/thr kinase, ABC1 family                                      |
| <i>Chlamydomonas reinhardtii</i> | A8I547        | Thylakoid membrane protein                                       |
| <i>Chlamydomonas reinhardtii</i> | A8IAE5        | Predicted protein                                                |
| <i>Chlamydomonas reinhardtii</i> | A8ISE8        | Predicted protein (Fragment)                                     |
| <i>Chlamydomonas reinhardtii</i> | A8IXV0        | Thylakoid lumen protein                                          |
| <i>Chlamydomonas reinhardtii</i> | A8J9W8        | Predicted protein (Fragment)                                     |
| <i>Chlamydomonas reinhardtii</i> | A8JA70        | Ferredoxin thioredoxin reductase, variable chain                 |
| <i>Chlamydomonas reinhardtii</i> | A8JDK2        | Predicted protein                                                |

| Species                          | Gene model ID | Product name                                                              |
|----------------------------------|---------------|---------------------------------------------------------------------------|
| <i>Chlamydomonas reinhardtii</i> | A8JGP5        | Ribulose biphosphate carboxylase small chain (EC 4.1.1.39)                |
| <i>Chlamydomonas reinhardtii</i> | A8JH83        | Predicted protein                                                         |
| <i>Chlamydomonas reinhardtii</i> | A8JHT4        | Serine/threonine protein kinase                                           |
| <i>Chlamydomonas reinhardtii</i> | P41758        | Phosphoglycerate kinase, chloroplastic (EC 2.7.2.3)                       |
| <i>Chlamydomonas reinhardtii</i> | Q547G1        | Chlorophyll a-b binding protein, chloroplastic                            |
| <i>Chlamydomonas reinhardtii</i> | Q8S567        | Chlorophyll a-b binding protein, chloroplastic                            |
| <i>Chlamydomonas reinhardtii</i> | Q9S8U0        | Chlorophyll a-b binding protein, chloroplastic (Fragment)                 |
| <i>Chlamydomonas reinhardtii</i> | Q9S8U1        | Chlorophyll a-b binding protein, chloroplastic (Fragment)                 |
| <i>Chlamydomonas reinhardtii</i> | Q9S8U2        | Chlorophyll a-b binding protein, chloroplastic (Fragment)                 |
| <i>Chlamydomonas reinhardtii</i> | Q9S8U3        | Chlorophyll a-b binding protein, chloroplastic (Fragment)                 |
| <i>Chlamydomonas reinhardtii</i> | Q9S9B5        | Photosystem I light-harvesting complex chlorophyll A/B protein            |
| <i>Chlamydomonas reinhardtii</i> | Q9FVE3        | Chlorophyll a-b binding protein, chloroplastic                            |
| <i>Chlamydomonas reinhardtii</i> | Q7DM26        | Chlorophyll a-b binding protein, chloroplastic                            |
| <i>Chlamydomonas reinhardtii</i> | P14273        | Chlorophyll a-b binding protein of LHClI type I, chloroplastic            |
| <i>Chlamydomonas reinhardtii</i> | Q9AXF6        | Chlorophyll a-b binding protein, chloroplastic                            |
| <i>Chlamydomonas reinhardtii</i> | A8IXU9        | Predicted protein                                                         |
| <i>Chlamydomonas reinhardtii</i> | A8J9V2        | Predicted protein                                                         |
| <i>Chlamydomonas reinhardtii</i> | A8I9T6        | Predicted protein                                                         |
| <i>Chlamydomonas reinhardtii</i> | A8J5N6        | Predicted protein                                                         |
| <i>Chlamydomonas reinhardtii</i> | A8I8C6        | Predicted protein                                                         |
| <i>Chlamydomonas reinhardtii</i> | A8HZ72        | Predicted protein                                                         |
| <i>Chlamydomonas reinhardtii</i> | A8I531        | Mg-protoporphyrin IX chelatase (EC 6.6.1.1)                               |
| <i>Chlamydomonas reinhardtii</i> | A6Q0K5        | Calvin cycle protein CP12, chloroplastic (CP12 domain-containing protein) |
| <i>Chlamydomonas reinhardtii</i> | A8IRG9        | Predicted protein                                                         |
| <i>Chlamydomonas reinhardtii</i> | A8I5A0        | Predicted protein                                                         |
| <i>Chlamydomonas reinhardtii</i> | A8ITX0        | Copper response defect 1 protein                                          |
| <i>Chlamydomonas reinhardtii</i> | Q9LD46        | Magnesium-protoporphyrin IX monomethyl ester [oxidative] cyclase 1        |
| <i>Chlamydomonas reinhardtii</i> | P46284        | Sedoheptulose-1,7-bisphosphatase, chloroplastic                           |
| <i>Chlamydomonas reinhardtii</i> | Q9AR22        | Magnesium-protoporphyrin IX monomethyl ester [oxidative] cyclase 2        |
| <i>Chlamydomonas reinhardtii</i> | A8IKK7        | Copper target 1 protein                                                   |
| <i>Chlamydomonas reinhardtii</i> | A8IC93        | Heavy metal transporting ATPase                                           |
| <i>Chlamydomonas reinhardtii</i> | A8I8X2        | DegP-type protease                                                        |
| <i>Chlamydomonas reinhardtii</i> | A8JH35        | DegP-type protease                                                        |
| <i>Chlamydomonas reinhardtii</i> | A8HQB3        | DegP-type protease (EC 3.4.21.-)                                          |
| <i>Chlamydomonas reinhardtii</i> | O48663        | Chloroplast w6 desaturase (Omega-6-FAD, chloroplast isoform)              |
| <i>Chlamydomonas reinhardtii</i> | A8IKQ0        | Fructose-1,6-bisphosphatase (EC 3.1.3.11)                                 |
| <i>Chlamydomonas reinhardtii</i> | P50362        | Glyceraldehyde-3-phosphate dehydrogenase A, chloroplastic                 |
| <i>Chlamydomonas reinhardtii</i> | Q84Y02        | Chlorophyll a-b binding protein, chloroplastic                            |
| <i>Chlamydomonas reinhardtii</i> | A8J249        | Chlorophyll a-b binding protein, chloroplastic                            |
| <i>Chlamydomonas reinhardtii</i> | Q05093        | Chlorophyll a-b binding protein, chloroplastic                            |
| <i>Chlamydomonas reinhardtii</i> | A8IKC8        | Chlorophyll a-b binding protein, chloroplastic                            |
| <i>Chlamydomonas reinhardtii</i> | A8JF10        | Chlorophyll a-b binding protein, chloroplastic                            |
| <i>Chlamydomonas reinhardtii</i> | A8I000        | Chlorophyll a-b binding protein, chloroplastic (Fragment)                 |
| <i>Chlamydomonas reinhardtii</i> | A8ISG0        | Chlorophyll a-b binding protein, chloroplastic                            |
| <i>Chlamydomonas reinhardtii</i> | A8ITV3        | Chlorophyll a-b binding protein, chloroplastic                            |
| <i>Chlamydomonas reinhardtii</i> | Q9ZSJ5        | Chlorophyll a-b binding protein, chloroplastic                            |
| <i>Chlamydomonas reinhardtii</i> | Q9ZSJ4        | Chlorophyll a-b binding protein, chloroplastic                            |
| <i>Chlamydomonas reinhardtii</i> | A8J6D1        | Chlorophyll a-b binding protein, chloroplastic                            |
| <i>Chlamydomonas reinhardtii</i> | Q93WD2        | Chlorophyll a-b binding protein CP29 (Lhcbm4)                             |
| <i>Chlamydomonas reinhardtii</i> | Q9FEK6        | Chlorophyll a-b binding protein, chloroplastic                            |
| <i>Chlamydomonas reinhardtii</i> | A8JCU4        | Chlorophyll a-b binding protein, chloroplastic                            |
| <i>Chlamydomonas reinhardtii</i> | Q8S3U0        | Chlorophyll a-b binding protein, chloroplastic                            |
| <i>Chlamydomonas reinhardtii</i> | A8J264        | Chlorophyll a-b binding protein, chloroplastic                            |
| <i>Chlamydomonas reinhardtii</i> | A8J287        | Chlorophyll a-b binding protein, chloroplastic                            |
| <i>Chlamydomonas reinhardtii</i> | Q8S3T8        | Chlorophyll a-b binding protein, chloroplastic                            |
| <i>Chlamydomonas reinhardtii</i> | A8J270        | Chlorophyll a-b binding protein, chloroplastic                            |
| <i>Chlamydomonas reinhardtii</i> | Q8S3T9        | Chlorophyll a-b binding protein, chloroplastic                            |
| <i>Chlamydomonas reinhardtii</i> | A8I3C6        | Chlorophyll a-b binding protein, chloroplastic                            |
| <i>Chlamydomonas reinhardtii</i> | Q75VZ0        | Chlorophyll a-b binding protein, chloroplastic                            |
| <i>Chlamydomonas reinhardtii</i> | Q75VY9        | Chlorophyll a-b binding protein, chloroplastic                            |
| <i>Chlamydomonas reinhardtii</i> | Q75VY8        | Chlorophyll a-b binding protein, chloroplastic                            |
| <i>Chlamydomonas reinhardtii</i> | Q75VY7        | Chlorophyll a-b binding protein, chloroplastic                            |

| Species                          | Gene model ID | Product name                                                                   |
|----------------------------------|---------------|--------------------------------------------------------------------------------|
| <i>Chlamydomonas reinhardtii</i> | Q75VY6        | Chlorophyll a-b binding protein, chloroplastic                                 |
| <i>Chlamydomonas reinhardtii</i> | Q75VY4        | Chlorophyll a-b binding protein, chloroplastic                                 |
| <i>Chlamydomonas reinhardtii</i> | Q93WL4        | Chlorophyll a-b binding protein, chloroplastic                                 |
| <i>Chlamydomonas reinhardtii</i> | Q93WE0        | Chlorophyll a-b binding protein, chloroplastic                                 |
| <i>Chlamydomonas reinhardtii</i> | Q93VE0        | Chlorophyll a-b binding protein, chloroplastic                                 |
| <i>Chlamydomonas reinhardtii</i> | A810C6        | Chlorophyll a-b binding protein, chloroplastic (Fragment)                      |
| <i>Chlamydomonas reinhardtii</i> | A8J431        | Chlorophyll a-b binding protein, chloroplastic                                 |
| <i>Chlamydomonas reinhardtii</i> | P93663        | Chlorophyll a-b binding protein, chloroplastic (Fragment)                      |
| <i>Chlamydomonas reinhardtii</i> | P93664        | Chlorophyll a-b binding protein, chloroplastic                                 |
| <i>Chlamydomonas reinhardtii</i> | A8J9Y1        | Cytochrome b6-f complex iron-sulfur subunit (EC 1.10.9.1)                      |
| <i>Chlamydomonas reinhardtii</i> | B2XYG6        | Rieske iron-sulfur protein of cytochrome B6/F complex (Fragment)               |
| <i>Chlamydomonas reinhardtii</i> | P49728        | Cytochrome b6-f complex iron-sulfur subunit, chloroplastic                     |
| <i>Chlamydomonas reinhardtii</i> | P53991        | Ferredoxin--NADP reductase, chloroplastic (FNR) (EC 1.18.1.2)                  |
| <i>Chlamydomonas reinhardtii</i> | P08197        | Cytochrome c6, chloroplastic                                                   |
| <i>Chlamydomonas reinhardtii</i> | P50369        | Cytochrome b6-f complex subunit 6                                              |
| <i>Chlamydomonas reinhardtii</i> | P0C1D4        | Cytochrome b6-f complex subunit 8, chloroplastic                               |
| <i>Chlamydomonas reinhardtii</i> | Q9LLC6        | Cytochrome b6-f complex subunit petO, chloroplastic                            |
| <i>Chlamydomonas reinhardtii</i> | A8HPJ2        | NADPH-protochlorophyllide oxidoreductase (EC 1.3.1.33)                         |
| <i>Chlamydomonas reinhardtii</i> | Q39617        | Protochlorophyllide reductase, chloroplastic (PCR)                             |
| <i>Chlamydomonas reinhardtii</i> | P19824        | Phosphoribulokinase, chloroplastic (PRK) (PRKase)                              |
| <i>Chlamydomonas reinhardtii</i> | A8J827        | Organelle class II aminoacyl tRNA synthetase                                   |
| <i>Chlamydomonas reinhardtii</i> | Q39615        | Photosystem I reaction center subunit II, chloroplastic                        |
| <i>Chlamydomonas reinhardtii</i> | Q5NKW4        | Photosystem I reaction center subunit II, 20 kDa                               |
| <i>Chlamydomonas reinhardtii</i> | A8ICV4        | Photosystem I 8.1 kDa reaction center subunit IV                               |
| <i>Chlamydomonas reinhardtii</i> | P12352        | Photosystem I reaction center subunit IV, chloroplastic                        |
| <i>Chlamydomonas reinhardtii</i> | A8J4S1        | Photosystem I reaction center subunit III                                      |
| <i>Chlamydomonas reinhardtii</i> | P12356        | Photosystem I reaction center subunit III, chloroplastic                       |
| <i>Chlamydomonas reinhardtii</i> | A8JHN9        | Photosystem I reaction center subunit V (Fragment)                             |
| <i>Chlamydomonas reinhardtii</i> | P14224        | Photosystem I reaction center subunit V, chloroplastic                         |
| <i>Chlamydomonas reinhardtii</i> | A8IH77        | Subunit H of photosystem I                                                     |
| <i>Chlamydomonas reinhardtii</i> | P13352        | Photosystem I reaction center subunit VI, chloroplastic                        |
| <i>Chlamydomonas reinhardtii</i> | A8J6K8        | Photosystem I reaction center subunit psaK                                     |
| <i>Chlamydomonas reinhardtii</i> | P14225        | Photosystem I reaction center subunit psaK, chloroplastic                      |
| <i>Chlamydomonas reinhardtii</i> | A8L32         | Photosystem I reaction center subunit XI                                       |
| <i>Chlamydomonas reinhardtii</i> | A8I835        | Photosystem I reaction center subunit N                                        |
| <i>Chlamydomonas reinhardtii</i> | Q9AXJ2        | PsaN                                                                           |
| <i>Chlamydomonas reinhardtii</i> | A8JCL6        | Photosystem I subunit O                                                        |
| <i>Chlamydomonas reinhardtii</i> | A8III5        | Photosystem II reaction center Psb28 protein                                   |
| <i>Chlamydomonas reinhardtii</i> | A8J0E4        | Oxygen-evolving enhancer protein 1 of photosystem II                           |
| <i>Chlamydomonas reinhardtii</i> | P12853        | Oxygen-evolving enhancer protein 1, chloroplastic (OEE1)                       |
| <i>Chlamydomonas reinhardtii</i> | P11471        | Oxygen-evolving enhancer protein 2, chloroplastic (OEE2)                       |
| <i>Chlamydomonas reinhardtii</i> | A8IYH9        | Oxygen-evolving enhancer protein 2 of photosystem II                           |
| <i>Chlamydomonas reinhardtii</i> | A8J3S9        | PsbP-like protein                                                              |
| <i>Chlamydomonas reinhardtii</i> | A8IKE6        | OEE2-like protein of thylakoid lumen                                           |
| <i>Chlamydomonas reinhardtii</i> | A8J4E8        | Luminal PsbP-like protein                                                      |
| <i>Chlamydomonas reinhardtii</i> | A8J170        | Thylakoid-anchored PsbP-like protein                                           |
| <i>Chlamydomonas reinhardtii</i> | A8IHH9        | Lumen targeted protein                                                         |
| <i>Chlamydomonas reinhardtii</i> | A8J1Z8        | PsbP-like protein                                                              |
| <i>Chlamydomonas reinhardtii</i> | A8JEV1        | Oxygen evolving enhancer protein 3                                             |
| <i>Chlamydomonas reinhardtii</i> | P12852        | Oxygen-evolving enhancer protein 3, chloroplastic (OEE3)                       |
| <i>Chlamydomonas reinhardtii</i> | A8HXG5        | 10 kDa photosystem II polypeptide (Fragment)                                   |
| <i>Chlamydomonas reinhardtii</i> | A8HPM2        | Chloroplast photosystem II-associated 22 kDa protein                           |
| <i>Chlamydomonas reinhardtii</i> | A8HPM5        | Chloroplast photosystem II-associated 22 kDa protein                           |
| <i>Chlamydomonas reinhardtii</i> | A8JFQ7        | Photosystem II reaction center W protein                                       |
| <i>Chlamydomonas reinhardtii</i> | Q9SPI9        | Photosystem II reaction center W protein, chloroplastic (PSII 6.1 kDa protein) |
| <i>Chlamydomonas reinhardtii</i> | A8I846        | 4.1 kDa photosystem II subunit                                                 |
| <i>Chlamydomonas reinhardtii</i> | A8I003        | Ycf32-related subunit of photosystem II                                        |
| <i>Chlamydomonas reinhardtii</i> | A8JKA1        | Ycf32-related polyprotein of photosystem II (Fragment)                         |
| <i>Chlamydomonas reinhardtii</i> | P00873        | Ribulose biphosphate carboxylase small chain 1, chloroplastic                  |
| <i>Chlamydomonas reinhardtii</i> | P08475        | Ribulose biphosphate carboxylase small chain 2, chloroplastic                  |
| <i>Chlamydomonas reinhardtii</i> | A8JGP8        | Ribulose biphosphate carboxylase small chain (EC 4.1.1.39)                     |
| <i>Chlamydomonas reinhardtii</i> | A8I686        | Rubredoxin                                                                     |

| Species                          | Gene model ID | Product name                                                      |
|----------------------------------|---------------|-------------------------------------------------------------------|
| <i>Chlamydomonas reinhardtii</i> | A8J682        | Protein translocase subunit SecA                                  |
| <i>Chlamydomonas reinhardtii</i> | A8J680        | Chloroplast-associated SecA protein (Fragment)                    |
| <i>Chlamydomonas reinhardtii</i> | Q84V17        | Protein kinase                                                    |
| <i>Chlamydomonas reinhardtii</i> | Q84V18        | Serine/threonine-protein kinase stt7, chloroplastic (EC 2.7.11.1) |
| <i>Chlamydomonas reinhardtii</i> | Q7X8Y6        | PsaB RNA binding protein (Tab2 protein)                           |
| <i>Chlamydomonas reinhardtii</i> | A8HY43        | Thylakoid lumenal protein                                         |
| <i>Chlamydomonas reinhardtii</i> | A8J4Q7        | Rieske [2Fe-2S] protein                                           |
| <i>Chlamydomonas reinhardtii</i> | A8JH60        | Predicted protein                                                 |
| <i>Chlamydomonas reinhardtii</i> | A8HR79        | Inositol phosphatase-like protein                                 |
| <i>Chlamydomonas reinhardtii</i> | P50370        | Photosystem II reaction center protein Ycf12                      |
| <i>Chlamydomonas reinhardtii</i> | A8JFP5        | DnaJ-like zinc-finger protein                                     |
| <i>Cyanidioschyzon merolae</i>   | Q85FX6        | Magnesium-protoporphyrin IX monomethyl ester [oxidative] cyclase  |
| <i>Cyanidioschyzon merolae</i>   | Q85FW7        | Allophycocyanin alpha chain                                       |
| <i>Cyanidioschyzon merolae</i>   | Q85FW6        | Allophycocyanin beta chain                                        |
| <i>Cyanidioschyzon merolae</i>   | Q85FS6        | Allophycocyanin alpha-B chain                                     |
| <i>Cyanidioschyzon merolae</i>   | Q85FW8        | Phycobilisome linker polypeptide                                  |
| <i>Cyanidioschyzon merolae</i>   | Q85G58        | Allophycocyanin B18 chain                                         |
| <i>Cyanidioschyzon merolae</i>   | Q85G43        | Phycocyanin alpha chain                                           |
| <i>Cyanidioschyzon merolae</i>   | Q85G42        | Phycocyanin beta chain                                            |
| <i>Cyanidioschyzon merolae</i>   | Q85G55        | Phycobilisome rod-core linker polypeptide                         |
| <i>Cyanidioschyzon merolae</i>   | M1VEV9        | Similar to oxygen-evolving complex component psbQ                 |
| <i>Cyanidioschyzon merolae</i>   | M1VAS6        | Photosystem II biogenesis protein Psb29                           |
| <i>Cyanidioschyzon merolae</i>   | M1V7V9        | Photosystem II 12 kD extrinsic protein                            |
| <i>Cyanidioschyzon merolae</i>   | M1V7X1        | Cytochrome b6-f complex iron-sulfur subunit (EC 1.10.9.1)         |
| <i>Cyanidioschyzon merolae</i>   | A0A125YL28    | Manganese-stabilizing protein                                     |
| <i>Cyanidioschyzon merolae</i>   | M1URM8        | Geranylgeranyl hydrogenase                                        |
| <i>Cyanidioschyzon merolae</i>   | M1V8D6        | Photosystem II protein Psb27                                      |
| <i>Cyanidioschyzon merolae</i>   | M1USG1        | Probable potassium transporter                                    |
| <i>Cyanidioschyzon merolae</i>   | M1V5Q9        | Mg-protoporphyrin IX chelatase (EC 6.6.1.1)                       |
| <i>Cyanidioschyzon merolae</i>   | M1V926        | Uncharacterized protein                                           |
| <i>Cyanidioschyzon merolae</i>   | M1UU36        | Similar to chlorophyll a/b-binding protein, CP24                  |
| <i>Cyanidioschyzon merolae</i>   | M1V9B8        | Photosystem II oxygen-evolving complex 23K protein                |
| <i>Cyanidioschyzon merolae</i>   | M1VET8        | Cytochrome b6-f complex iron-sulfur subunit (EC 1.10.9.1)         |
| <i>Cyanidioschyzon merolae</i>   | M1UUN3        | Fructose-1,6-bisphosphatase                                       |
| <i>Cyanidioschyzon merolae</i>   | M1UUN7        | Phycocyanin-associated rod linker protein                         |
| <i>Cyanidioschyzon merolae</i>   | M1VFH7        | Similar to ferredoxin-thioredoxin reductase, variable chain       |
| <i>Cyanidioschyzon merolae</i>   | M1V643        | Fructose-1,6-bisphosphatase                                       |
| <i>Cyanidioschyzon merolae</i>   | M1VFP4        | Phycocyanin-associated rod linker protein                         |
| <i>Cyanidioschyzon merolae</i>   | M1VKK5        | Similar to light harvesting protein                               |
| <i>Cyanidioschyzon merolae</i>   | M1UVM3        | Cytochrome b6-f complex iron-sulfur subunit (EC 1.10.9.1)         |
| <i>Cyanidioschyzon merolae</i>   | M1VGG3        | Protein translocase subunit SecA                                  |
| <i>Cyanidioschyzon merolae</i>   | M1UWW8        | Uncharacterized protein                                           |
| <i>Cyanidioschyzon merolae</i>   | M1VCA0        | DegP protease                                                     |
| <i>Cyanidioschyzon merolae</i>   | M1V7K1        | Photosystem II protein M                                          |
| <i>Cyanidioschyzon merolae</i>   | M1VIA2        | PGR5                                                              |
| <i>Cyanidioschyzon merolae</i>   | M1VML8        | Similar to oxygen-evolving complex component psbP                 |
| <i>Cyanidioschyzon merolae</i>   | Q85FS2        | Cytochrome c6 (Cytochrome c-553) (Cytochrome c553)                |
| <i>Cyanidioschyzon merolae</i>   | Q85FX8        | Cytochrome b6-f complex subunit 7                                 |
| <i>Cyanidioschyzon merolae</i>   | Q85FX7        | Cytochrome b6-f complex subunit 8                                 |
| <i>Cyanidioschyzon merolae</i>   | Q85FX3        | Prenyl transferase                                                |
| <i>Cyanidioschyzon merolae</i>   | Q85FZ1        | Photosystem I iron-sulfur center subunit VII                      |
| <i>Cyanidioschyzon merolae</i>   | Q85FS9        | Photosystem I reaction center subunit II                          |
| <i>Cyanidioschyzon merolae</i>   | Q85G51        | Photosystem I reaction center subunit X                           |
| <i>Cyanidioschyzon merolae</i>   | Q85FP8        | Photosystem I reaction center subunit XI (PSI subunit V) (PSI-L)  |
| <i>Cyanidioschyzon merolae</i>   | Q85FS3        | Cytochrome c-550 (Cytochrome c550)                                |
| <i>Cyanidioschyzon merolae</i>   | Q85FS5        | Photosystem II reaction center X protein                          |
| <i>Cyanidioschyzon merolae</i>   | Q85G61        | Photosystem II protein Y                                          |
| <i>Cyanidioschyzon merolae</i>   | O22024        | Ribulose biphosphate carboxylase small chain                      |
| <i>Cyanidioschyzon merolae</i>   | Q85G86        | Photosystem II reaction center protein Ycf12                      |

**Supplementary Table 7** Assembly statistics of *Plakobranthus ocellatus* & *Elysia marginata* genome

Summary of the sequenced raw data was submitted to FigShare (DOI, 10.6084/m9.figshare.12301277)

|                                   | <i>Plakobranthus ocellatus</i> | <i>Elysia marginata</i> | <i>Elysia chlorotica</i><br>by Cai <i>et al</i> (for comparison) |
|-----------------------------------|--------------------------------|-------------------------|------------------------------------------------------------------|
|                                   | type black                     |                         |                                                                  |
| Predicted genome size             | 936 Mb                         | 900 Mb                  | 575 Mb                                                           |
| Total length of scaffolds (bases) | 927,888,823                    | 790,322,091             | 557,479,671 bases                                                |
| % of estimated genome size        | 99%                            | 88%                     | 97%                                                              |
| # scaffolds                       | 8,647                          | 14,149                  | 9,987                                                            |
| # N bases                         | 78,653,622                     | 82,443,809              | 16,928,330                                                       |
| Longest scaffold (bp)             | 6,058,556                      | 1,540,588               | 2,353,793                                                        |
| Scaffold N50 (bases)              | 1,453,842                      | 225,654                 | 441,954                                                          |
| L50                               | 191                            | 967                     | 386                                                              |
| GC %                              | 35.85                          | 36.56                   | 37.65                                                            |
| # of predicted genes              | 77,230                         | 70,752                  | 23,871                                                           |
| BUSCO (eukaryota_odb9)            | 93.4% (283/303)                | 89.5% (271/303)         | 96.0% (291/303)                                                  |
| Complete single copy              | 92.1% (279/303)                | 87.8% (266/303)         | 95.0% (288/303)                                                  |
| Complete duplicated               | 1.3% (4/303)                   | 1.7% (5/303)            | 1.0% (3/303)                                                     |
| Fragmented                        | 5.9% (18/303)                  | 9.2% (28/303)           | 1.7% (5/303)                                                     |
| Missing                           | 0.7% (2/303)                   | 1.3% (4/303)            | 2.3% (7/303)                                                     |
| BUSCO (metazoa_odb9)              | 95.0% (929/978)                | 91.1% (891/978)         | 94.7% (926/978)                                                  |
| Complete single copy              | 93.1% (911/978)                | 89.6% (876/978)         | 93.3% (912/978)                                                  |
| Complete duplicated               | 1.8% (18/978)                  | 1.5% (15/978)           | 1.4% (14/978)                                                    |
| Fragmented                        | 3.6% (35/978)                  | 6.7% (66/978)           | 2.5% (24/978)                                                    |
| Missing                           | 1.4% (14/978)                  | 2.2% (21/978)           | 2.8% (28/978)                                                    |

**Supplementary Table 8** *P. ocellatus* scaffolds determined as bacterial contaminants.

These scaffolds were removed from the final assemblies. The mean depth of the read coverage was obtained from qualimap software. The mean coverage of reliable scaffolds = 31 (SD = 7)

| Scaffold ID          | Number of assigned genes<br>to each taxon |                | Number of<br>assigned<br>genes | Bacterial<br>gene (%) | Lophotrochozoan<br>gene (%) | Length<br>of<br>scaffold | Mean depth of read<br>coverage<br>(DRR029525) |
|----------------------|-------------------------------------------|----------------|--------------------------------|-----------------------|-----------------------------|--------------------------|-----------------------------------------------|
|                      | Bacteria                                  | Lophotrochozoa |                                |                       |                             |                          |                                               |
| scaffold14744_cov19  | 15                                        | 0              | 15                             | 100%                  | 0%                          | 10435                    | 14                                            |
| scaffold23411_cov18  | 15                                        | 0              | 15                             | 100%                  | 0%                          | 20458                    | 10                                            |
| scaffold29205_cov16  | 12                                        | 0              | 12                             | 100%                  | 0%                          | 17359                    | 5                                             |
| scaffold36956_cov17  | 11                                        | 0              | 11                             | 100%                  | 0%                          | 19423                    | 5                                             |
| scaffold9181_cov18   | 11                                        | 0              | 11                             | 100%                  | 0%                          | 19699                    | 5                                             |
| scaffold6787_cov20   | 7                                         | 0              | 7                              | 100%                  | 0%                          | 68528                    | 18                                            |
| scaffold2938_cov18   | 6                                         | 0              | 6                              | 100%                  | 0%                          | 5117                     | 11                                            |
| scaffold41017_cov16  | 5                                         | 0              | 5                              | 100%                  | 0%                          | 3853                     | 6                                             |
| scaffold10524_cov18  | 5                                         | 0              | 5                              | 100%                  | 0%                          | 7455                     | 5                                             |
| scaffold14201_cov20  | 5                                         | 0              | 5                              | 100%                  | 0%                          | 8425                     | 11                                            |
| scaffold38777_cov18  | 4                                         | 0              | 4                              | 100%                  | 0%                          | 5337                     | 6                                             |
| scaffold43224_cov17  | 4                                         | 0              | 4                              | 100%                  | 0%                          | 5427                     | 5                                             |
| scaffold76888_cov19  | 3                                         | 0              | 3                              | 100%                  | 0%                          | 2009                     | 8                                             |
| scaffold91525_cov17  | 3                                         | 0              | 3                              | 100%                  | 0%                          | 2018                     | 6                                             |
| scaffold47273_cov19  | 3                                         | 0              | 3                              | 100%                  | 0%                          | 2185                     | 8                                             |
| scaffold104155_cov18 | 3                                         | 0              | 3                              | 100%                  | 0%                          | 2295                     | 5                                             |
| scaffold101317_cov17 | 3                                         | 0              | 3                              | 100%                  | 0%                          | 2361                     | 7                                             |
| scaffold63294_cov18  | 3                                         | 0              | 3                              | 100%                  | 0%                          | 2378                     | 8                                             |
| scaffold68812_cov17  | 3                                         | 0              | 3                              | 100%                  | 0%                          | 2444                     | 6                                             |
| scaffold94243_cov18  | 3                                         | 0              | 3                              | 100%                  | 0%                          | 2477                     | 5                                             |
| scaffold139099_cov17 | 3                                         | 0              | 3                              | 100%                  | 0%                          | 2947                     | 7                                             |
| scaffold2019_cov18   | 3                                         | 0              | 3                              | 100%                  | 0%                          | 2995                     | 7                                             |
| scaffold29460_cov16  | 3                                         | 0              | 3                              | 100%                  | 0%                          | 3206                     | 7                                             |
| scaffold36584_cov18  | 3                                         | 0              | 3                              | 100%                  | 0%                          | 3906                     | 6                                             |
| scaffold14112_cov18  | 3                                         | 0              | 3                              | 100%                  | 0%                          | 4069                     | 5                                             |
| scaffold14975_cov17  | 3                                         | 0              | 3                              | 100%                  | 0%                          | 4502                     | 5                                             |
| scaffold38649_cov18  | 3                                         | 0              | 3                              | 100%                  | 0%                          | 4625                     | 5                                             |
| scaffold133004_cov14 | 2                                         | 0              | 2                              | 100%                  | 0%                          | 2170                     | 8                                             |
| scaffold102852_cov17 | 2                                         | 0              | 2                              | 100%                  | 0%                          | 2181                     | 8                                             |
| scaffold133690_cov15 | 2                                         | 0              | 2                              | 100%                  | 0%                          | 2189                     | 7                                             |

**Supplementary Table 8** (continue)

| Scaffold ID          | Number of assigned genes<br>to each taxon |                | Number of<br>assigned<br>genes | Bacterial<br>gene (%) | Lophotrochozoan<br>gene (%) | Length<br>of<br>scaffold | Mean depth of<br>read coverage<br>(DRR029525) |
|----------------------|-------------------------------------------|----------------|--------------------------------|-----------------------|-----------------------------|--------------------------|-----------------------------------------------|
|                      | Bacteria                                  | Lophotrochozoa |                                |                       |                             |                          |                                               |
| scaffold70567_cov16  | 2                                         | 0              | 2                              | 100%                  | 0%                          | 2238                     | 6                                             |
| scaffold7044_cov15   | 2                                         | 0              | 2                              | 100%                  | 0%                          | 2252                     | 6                                             |
| scaffold132820_cov15 | 2                                         | 0              | 2                              | 100%                  | 0%                          | 2360                     | 9                                             |
| scaffold51863_cov16  | 2                                         | 0              | 2                              | 100%                  | 0%                          | 2374                     | 6                                             |
| scaffold20986_cov16  | 2                                         | 0              | 2                              | 100%                  | 0%                          | 2415                     | 6                                             |
| scaffold24966_cov16  | 2                                         | 0              | 2                              | 100%                  | 0%                          | 2430                     | 8                                             |
| scaffold2495_cov21   | 2                                         | 0              | 2                              | 100%                  | 0%                          | 2616                     | 8                                             |
| scaffold42664_cov15  | 2                                         | 0              | 2                              | 100%                  | 0%                          | 2740                     | 5                                             |
| scaffold34283_cov13  | 2                                         | 0              | 2                              | 100%                  | 0%                          | 2771                     | 9                                             |
| scaffold47213_cov18  | 2                                         | 0              | 2                              | 100%                  | 0%                          | 2803                     | 7                                             |
| scaffold75651_cov17  | 2                                         | 0              | 2                              | 100%                  | 0%                          | 3318                     | 5                                             |
| scaffold38162_cov16  | 2                                         | 0              | 2                              | 100%                  | 0%                          | 3368                     | 6                                             |
| scaffold91118_cov47  | 2                                         | 0              | 2                              | 100%                  | 0%                          | 3713                     | 23                                            |
| scaffold56142_cov17  | 2                                         | 0              | 2                              | 100%                  | 0%                          | 3860                     | 5                                             |
| scaffold28252_cov17  | 2                                         | 0              | 2                              | 100%                  | 0%                          | 3901                     | 4                                             |
| scaffold5516_cov17   | 2                                         | 0              | 2                              | 100%                  | 0%                          | 4165                     | 3                                             |
| scaffold59092_cov17  | 2                                         | 0              | 2                              | 100%                  | 0%                          | 4973                     | 3                                             |
| scaffold4312_cov15   | 2                                         | 0              | 2                              | 100%                  | 0%                          | 5982                     | 3                                             |
| scaffold40129_cov20  | 2                                         | 0              | 2                              | 100%                  | 0%                          | 7301                     | 17                                            |
| scaffold4993_cov50   | 2                                         | 0              | 2                              | 100%                  | 0%                          | 8072                     | 328                                           |
| scaffold14367_cov18  | 2                                         | 0              | 2                              | 100%                  | 0%                          | 11542                    | 11                                            |
| scaffold5373_cov18   | 2                                         | 0              | 2                              | 100%                  | 0%                          | 12943                    | 20                                            |
| scaffold24205_cov20  | 2                                         | 0              | 2                              | 100%                  | 0%                          | 17847                    | 18                                            |
| scaffold383_cov20    | 2                                         | 0              | 2                              | 100%                  | 0%                          | 18449                    | 14                                            |
| scaffold2812_cov22   | 2                                         | 0              | 2                              | 100%                  | 0%                          | 36269                    | 15                                            |



**Supplementary Table 9** Scaffolds of PoB determined as kleptoplast/mitochondrion sequences

| Scaffold ID            | Blastn Bits score against... |                 |                           |                                | Length of scaffold | Mean depth of read coverage | Contaminant |
|------------------------|------------------------------|-----------------|---------------------------|--------------------------------|--------------------|-----------------------------|-------------|
|                        | kpDNA-                       | kpDNA-          |                           | mtDNA of                       |                    |                             |             |
|                        | Poros (AP014542)             | Rhip (AP014543) | <i>Bryopsis hypnoides</i> | <i>P. ocellatus</i> (AP014544) |                    |                             |             |
| scaffold261989_cov475  | 4130                         | 7661            | -                         | -                              | 4148               | 1957                        | Kp          |
| scaffold265330_cov435  | 3616                         | 6024            | -                         | -                              | 3265               | 3673                        | Kp          |
| scaffold269291_cov457  | 2878                         | 13854           | -                         | -                              | 7520               | 1546                        | Kp          |
| scaffold262266_cov503  | 2839                         | 6026            | -                         | -                              | 3263               | 1963                        | Kp          |
| scaffold262910_cov447  | 1965                         | 3770            | -                         | -                              | 2041               | 1574                        | Kp          |
| scaffold81938_cov17    | 1755                         | -               | -                         | -                              | 2861               | 4876                        | Kp          |
| scaffold60758_cov17    | 1568                         | -               | -                         | -                              | 2026               | 5143                        | Kp          |
| scaffold265343_cov510  | 1543                         | 4747            | -                         | -                              | 2570               | 1678                        | Kp          |
| scaffold268313_cov495  | 1496                         | 5677            | -                         | -                              | 3074               | 2306                        | Kp          |
| scaffold270056_cov465  | 1447                         | 3880            | -                         | -                              | 2284               | 631                         | Kp          |
| scaffold270078_cov462  | 1066                         | 3869            | -                         | -                              | 2095               | 1624                        | Kp          |
| scaffold70008_cov17    | 1002                         | 1077            | -                         | -                              | 2714               | 953                         | Kp          |
| scaffold261853_cov518  | 955                          | 5836            | -                         | -                              | 3241               | 537                         | Kp          |
| scaffold266106_cov1743 | -                            | -               | -                         | 2939                           | 2417               | 1284                        | Mt          |

**Supplementary Table 10** Analyzed protein sequences by SonicParanoid analysis

Four PoB genes (gene ID: p197c68.18, p234c64.89, p45387c41.1, and p466c59.83) annotated as “Chloroplast” (Fig. 4a) showed no orthologous relationships with algal genes. Detailed data was submitted to FigShare (DOI 10.6084/m9.figshare.12301277)

| ID   | Species (genome version)                            | Number of sequences | Source                                                                                                                                          |
|------|-----------------------------------------------------|---------------------|-------------------------------------------------------------------------------------------------------------------------------------------------|
| Mmu  | <i>Mus musculus</i>                                 | 16,998              | Uniprot; 10090 (Reviewed genes only)                                                                                                            |
| Hsa  | <i>Homo sapiens</i>                                 | 20,350              | Uniprot; 9606 (Reviewed genes only)                                                                                                             |
| Gga  | <i>Gallus gallus</i>                                | 36,539              | Uniprot; 9031                                                                                                                                   |
| Dre  | <i>Danio rerio</i>                                  | 59,676              | Uniprot; 7739                                                                                                                                   |
| Bfl  | <i>Branchiostoma floridae</i>                       | 29,302              | Uniprot; 7955                                                                                                                                   |
| Dme  | <i>Drosophila melanogaster</i>                      | 42,467              | Uniprot; 7227                                                                                                                                   |
| Bmo  | <i>Bombyx mori</i>                                  | 18,381              | Uniprot; 7091                                                                                                                                   |
| Api  | <i>Acyrtosiphon pisum</i>                           | 37,406              | Uniprot; 7029                                                                                                                                   |
| Cte  | <i>Capitella teleta</i>                             | 32,114              | Uniprot; 283909                                                                                                                                 |
| Lan  | <i>Lingula anatina</i> (synonym <i>unguis</i> )     | 34,469              | Uniprot; 7574                                                                                                                                   |
| Obi  | <i>Octopus bimaculoides</i>                         | 23,994              | INSDC; PRJNA270931 (Octopus_bimaculoides_v2_0)                                                                                                  |
| Cgi  | <i>Crassostrea gigas</i> (oyster_v9)                | 46,748              | INSDC; PRJNA276446                                                                                                                              |
| Pfu  | <i>Pinctada fucata</i> (v2.0)                       | 31,477              | <a href="http://marinegenomics.oist.jp/pearl/viewer/info?project_id=36">http://marinegenomics.oist.jp/pearl/viewer/info?project_id=36</a>       |
| Hdi  | <i>Haliotis discus</i>                              | 29,449              | <a href="http://gigadb.org/dataset/100281">http://gigadb.org/dataset/100281</a>                                                                 |
| Lgi  | <i>Lottia gigantea</i>                              | 23,822              | INSDC; PRJNA259762                                                                                                                              |
| Bgl  | <i>Biomphalaria glabrata</i> (ASM45736v1)           | 36,675              | INSDC; PRJNA290623                                                                                                                              |
| Aca  | <i>Aplysia californica</i> (AplCal3.0)              | 27,591              | INSDC; PRJNA209509                                                                                                                              |
| Eor  | <i>Elysia ornata</i>                                | 70,752              | Present data                                                                                                                                    |
| Poc  | <i>Plakobranchnus ocellatus</i>                     | 77,230              | Present data                                                                                                                                    |
| Cale | <i>Caulerpa lentillifera</i>                        | 9,762               | <a href="https://marinegenomics.oist.jp/umibudo/viewer/info?project_id=55">https://marinegenomics.oist.jp/umibudo/viewer/info?project_id=55</a> |
| Brhy | <i>Bryopsis hypnoides</i>                           | 24,127              | Present data                                                                                                                                    |
| Habo | <i>Halimeda borneensis</i>                          | 26,652              | Present data                                                                                                                                    |
| Sysp | <i>Synechocystis</i> sp. (strain PCC 6803 / Kazusa) | 3,507               | Uniprot; 1111708                                                                                                                                |
| Cyme | <i>Cyanidioschyzon merolae</i> (strain 10D)         | 4,997               | Uniprot; 280699                                                                                                                                 |
| Chre | <i>Chlamydomonas reinhardtii</i>                    | 15,245              | Uniprot; 3055                                                                                                                                   |
| Sace | <i>Saccharomyces cerevisiae</i> (strain S288C)      | 5,917               | The Saccharomyces Genome Database                                                                                                               |

**Supplementary Table 11** *P. ocellatus* gene models matching with algal A614 gene set (bit score > 100), and the difference of the top-hit bit score against the RefSeq database. We checked the potential HGT with A614 which contain sequences closer to the potential gene donor (e.g. transcriptomic data of *H. borneensis*) than RefSeq. If PoB genes contains the genes derived from the candidate gene donors, a blast analysis using A625 is expected to show a higher similarity score than using RefSeq. A blastp search of the gene models against the A614 dataset, however, obtained no hits with bit scores (measure of similarity) exceeding the values against the RefSeq database. Predicted taxonomical origin of the genes was described as “MEGAN annotation”. Raw data were deposited to FigShare (DOI, 10.6084/m9.figshare.12318977 and 10.6084/m9.figshare.12318989)

| Query ID     | blastp serch for A614 (Tophit)   |          | blastp serch for RefSeq |          | MEGAN annotation           |
|--------------|----------------------------------|----------|-------------------------|----------|----------------------------|
|              | Hit ID                           | bitscore | Hit ID                  | bitscore |                            |
| p1001c63.45  | g2246.t1                         | 184      | XP_012946173            | 1538     | <i>Aplysia californica</i> |
| p1039c62.98  | c11580_g1_i6 m.27466             | 253      | XP_012943102            | 2108     | <i>Aplysia californica</i> |
| p105c62.89   | g2055.t1                         | 369      | XP_013066033            | 724      | Euthyneura                 |
| p1126c66.54  | g2246.t1                         | 102      | XP_005112692            | 468      | Euthyneura                 |
| p1129c66.3   | g2246.t1                         | 145      | XP_013086043            | 1535     | Biomphalaria               |
| p1194c63.185 | A8HTY7                           | 126      | XP_005101564            | 720      | <i>Aplysia californica</i> |
| p12c69.84    | A8HPJ2                           | 112      | XP_005097012            | 420      | Eumetazoa                  |
| p128c64.119  | g2246.t1                         | 105      | XP_005105193            | 845      | Euthyneura                 |
| p128c64.123  | A8IC93                           | 108      | XP_005093402            | 425      | Euthyneura                 |
| p128c64.124  | A8IC93                           | 212      | XP_005093402            | 1262     | Euthyneura                 |
| p1410c65.71  | c11580_g1_i6 m.27466             | 309      | XP_005106574            | 1159     | Bilateria                  |
| p1415c66.5   | g2246.t1                         | 113      | XP_005101959            | 486      | Bilateria                  |
| p143c69.19   | c7971_g1_i1 m.5294               | 109      | XP_012942374            | 268      | <i>Aplysia californica</i> |
| p1579c67.15  | g2246.t1                         | 196      | XP_013079086            | 1268     | Euthyneura                 |
| p1662c68.113 | g2253.t1                         | 214      | XP_005111077            | 425      | Mollusca                   |
| p172c64.28   | P41758                           | 159      | XP_012938921            | 715      | <i>Aplysia californica</i> |
| p1740c61.62  | g6827.t1                         | 110      | XP_013080012            | 1171     | Euthyneura                 |
| p1749c74.6   | g566.t1                          | 114      | XP_013074513            | 269      | Euthyneura                 |
| p177c64.95   | g566.t1                          | 116      | XP_013082106            | 597      | Biomphalaria               |
| p178c62.99   | c7901_g1_i1 m.5169               | 288      | NP_001267755            | 551      | cellular organisms         |
| p1866c63.114 | g2246.t1                         | 156      | NP_001191516            | 1026     | Euthyneura                 |
| p1874c66.18  | TRINITY_DN16641_c1_g2_i1 m.37990 | 115      | XP_005103964            | 655      | Euthyneura                 |
| p195c62.4    | g566.t1                          | 104      | XP_013071140            | 325      | Protostomia                |
| p197c68.61   | P41758                           | 126      | XP_009047142            | 264      | Bilateria                  |
| p197c68.62   | TRINITY_DN35033_c0_g1_i1 m.48831 | 162      | XP_029167923            | 244      | Opisthokonta               |
| p197c68.63   | g2055.t1                         | 160      | XP_029826656            | 293      | Opisthokonta               |
| p2c67.70     | M1V643                           | 358      | XP_005094525            | 554      | Mollusca                   |
| p2036c63.14  | g2246.t1                         | 156      | XP_013067755            | 512      | Biomphalaria               |

**Supplementary Table 11** (continue)

| Query ID      | blastp serch for A614 (Tophit)   |          | blastp serch for RefSeq<br>(Tophit) |          | MEGAN annotation             |
|---------------|----------------------------------|----------|-------------------------------------|----------|------------------------------|
|               | Hit ID                           | bitscore | Hit ID                              | bitscore |                              |
| p2150c71.16   | c7971_g1_i1 m.5294               | 104      | XP_012936649                        | 982      | <i>Aplysia californica</i>   |
| p22c64.33     | g8157.t1                         | 147      | XP_025087870                        | 242      | Bilateria                    |
| p22c64.91     | g2246.t1                         | 199      | XP_013084647                        | 710      | Gastropoda                   |
| p220c72.103   | A8HPJ2                           | 115      | XP_005108304                        | 473      | <i>Aplysia californica</i>   |
| p233c60.101   | g2246.t1                         | 182      | XP_012939135                        | 1226     | <i>Aplysia californica</i>   |
| p234c64.107   | TRINITY_DN12378_c0_g1_i1 m.15485 | 105      | XP_005094813                        | 510      | Bilateria                    |
| p240c62.223   | c7901_g1_i1 m.5169               | 234      | XP_013095144                        | 399      | Opisthokonta                 |
| p258745c64.57 | g2246.t1                         | 174      | XP_025109728                        | 889      | Mollusca                     |
| p258747c66.26 | c7901_g1_i1 m.5169               | 252      | XP_021882283                        | 442      | Opisthokonta                 |
| p258753c65.32 | g2246.t1                         | 119      | XP_005096925                        | 934      | <i>Aplysia californica</i>   |
| p258757c71.5  | g2246.t1                         | 135      | XP_013063533                        | 770      | <i>Biomphalaria glabrata</i> |
| p258767c72.8  | c12405_g1_i2 m.44746             | 110      | XP_013074851                        | 510      | Euthyneura                   |
| p258785c70.94 | g2246.t1                         | 112      | XP_005089392                        | 576      | <i>Aplysia californica</i>   |
| p258855c56.6  | g4845.t1                         | 193      | XP_005098341                        | 809      | Euthyneura                   |
| p2590c71.26   | c11580_g1_i6 m.27466             | 288      | XP_012936084                        | 2115     | <i>Lingula anatina</i>       |
| p286c65.86    | g2246.t1                         | 119      | XP_005106460                        | 668      | Euthyneura                   |
| p288c60.11    | g566.t1                          | 119      | XP_005108744                        | 524      | Bilateria                    |
| p288c60.152   | g2246.t1                         | 191      | XP_012945723                        | 755      | Mollusca                     |
| p2897c68.9    | TRINITY_DN16641_c1_g2_i1 m.37990 | 126      | XP_005108305                        | 407      | Metazoa                      |
| p310c70.15    | g566.t1                          | 132      | XP_005706153                        | 254      | cellular organisms           |
| p310c70.19    | g566.t1                          | 127      | XP_017281256                        | 268      | Deuterostomia                |
| p400c61.2     | TRINITY_DN9341_c0_g1_i1 m.58406  | 375      | XP_013406588                        | 1973     | Bilateria                    |
| p431c71.1     | c11580_g1_i6 m.27466             | 404      | XP_012940404                        | 928      | <i>Aplysia californica</i>   |
| p47c72.89     | g2246.t1                         | 171      | XP_013092315                        | 751      | Euthyneura                   |
| p477c68.21    | TRINITY_DN6205_c0_g2_i1 m.45850  | 115      | XP_005110593                        | 552      | <i>Aplysia californica</i>   |
| p4907c66.39   | g2246.t1                         | 213      | XP_013094545                        | 1404     | Euthyneura                   |
| p4907c66.70   | g8157.t1                         | 158      | NP_001191661                        | 310      | Mollusca                     |
| p59c63.135    | g2246.t1                         | 169      | XP_013063765                        | 830      | Euthyneura                   |

**Supplementary Table 11** (continue)

| Query ID    | blastp serch for A614 (Tophit) |          | blastp serch for RefSeq<br>(Tophit) |          | MEGAN annotation             |
|-------------|--------------------------------|----------|-------------------------------------|----------|------------------------------|
|             | Hit ID                         | bitscore | Hit ID                              | bitscore |                              |
| p6c66.218   | g2246.t1                       | 174      | XP_013077719                        | 903      | Gastropoda                   |
| p63c64.1    | TRINITY_DN6424_c0_g1_i1 m.4839 | 106      | XP_013078984                        | 417      | Euthyneura                   |
| p63c64.15   | TRINITY_DN6424_c0_g1_i1 m.4839 | 112      | XP_013078984                        | 462      | Euthyneura                   |
| p638c73.235 | g5017.t1                       | 103      | XP_013069446                        | 726      | Euthyneura                   |
| p698c62.15  | g2246.t1                       | 127      | XP_013068187                        | 2881     | <i>Biomphalaria glabrata</i> |
| p761c66.63  | g2246.t1                       | 118      | NP_001191420                        | 647      | Bilateria                    |
| p763c69.146 | g3398.t1                       | 117      | XP_013081789                        | 579      | Euthyneura                   |
| p768c75.40  | g2246.t1                       | 195      | NP_001191633                        | 818      | <i>Aplysia californica</i>   |
| p770c72.37  | g4845.t1                       | 156      | XP_005098341                        | 548      | Euthyneura                   |
| p800c68.13  | g2246.t1                       | 169      | XP_012945411                        | 1051     | Euthyneura                   |
| p8162c67.56 | g2246.t1                       | 110      | XP_005105833                        | 547      | <i>Aplysia californica</i>   |
| p855c67.9   | g7280.t1                       | 424      | XP_012935158                        | 834      | Bilateria                    |
| p928c68.104 | g2246.t1                       | 178      | XP_012938859                        | 832      | Euthyneura                   |
| p943c68.38  | g2246.t1                       | 176      | XP_005103277                        | 3090     | <i>Aplysia californica</i>   |

**Supplementary Table 12** Applied species for HGT index analysis

| Data name         | Contained taxon              | Number of sequence | Source*                                                                                                                                         |
|-------------------|------------------------------|--------------------|-------------------------------------------------------------------------------------------------------------------------------------------------|
| Algae_DB          | Chlorophyta                  | 288,246            | Uniprot; 3041 (2018/10/19)                                                                                                                      |
|                   | Cyanobacteria                | 13,705             | Uniprot; 1117 (reviewed protein only: 2018/10/19)                                                                                               |
|                   | Rhodophyta                   | 94,537             | Uniprot; 2763 (2018/10/19)                                                                                                                      |
|                   | PX clade                     | 29,453             | Uniprot; 569578 (2018/10/19)                                                                                                                    |
|                   | <i>Bryopsis hypnoides</i>    | 24,127             | Present data (transcriptome)                                                                                                                    |
|                   | <i>Halimeda borneensis</i>   | 26,652             | Present data (transcriptome)                                                                                                                    |
|                   | <i>Caulerpa lentillifera</i> | 9,762              | <a href="https://marinegenomics.oist.jp/umibudo/viewer/info?project_id=55">https://marinegenomics.oist.jp/umibudo/viewer/info?project_id=55</a> |
| Loph_DB           | Lophotrochozoa               | 314,718            | taxonomy:"Lophotrochozoa [1206795]" - "Heterobranchia [216305]"                                                                                 |
| Prokaryote_DB     | Bacteria                     | 333,708            | Uniprot; 2 (reviewed protein only: 2018/11/1)                                                                                                   |
|                   | Archaea                      | 19,544             | Uniprot; 2157 (reviewed protein only:2018/11/1)                                                                                                 |
| Eukaryote_DB      | Eukaryota                    | 188,529            | Uniprot; 2759 (reviewed protein only:2018/11/1)                                                                                                 |
| Referential query |                              |                    |                                                                                                                                                 |
| Aca query         | <i>Aplysia californica</i>   | 27,591             | INSDC; PRJNA209509 (ApICal3.0)                                                                                                                  |
| Bgl query         | <i>Biomphalaria glabrata</i> | 36,675             | INSDC: PRJNA290623 (ASM45736v1)                                                                                                                 |

**Supplementary table 13** Enriched GOs of the significantly upregulated genes on the digestive gland of *P. ocellatus* type black (PoB)

| GO term description                                             | Over represented<br>p-value | DEG number<br>from PoB | Total gene<br>number in PoB | DG-upregulated gene belong the GO                                                                                                                                                                                                                                                                                                                                                                                                                                                                                                                                                                                                                                     |
|-----------------------------------------------------------------|-----------------------------|------------------------|-----------------------------|-----------------------------------------------------------------------------------------------------------------------------------------------------------------------------------------------------------------------------------------------------------------------------------------------------------------------------------------------------------------------------------------------------------------------------------------------------------------------------------------------------------------------------------------------------------------------------------------------------------------------------------------------------------------------|
| GO:0004190<br>aspartic-type endopeptidase activity              | 2.56E-71                    | 45                     | 288                         | p1440c63.113, p664c69.11, p855c67.174, p807c65.17, p1440c63.126,<br>p3924c64.18, p1440c63.80, p543c70.163, p1440c63.23, p1440c63.36,<br>p1440c63.12, p3924c64.17, p1440c63.63, p775c64.19, p3924c64.1, p665c65.51,<br>p664c69.19, p428c65.20, p1440c63.105, p665c65.34, p445c59.46, p1440c63.3,<br>p1412c61.10, p1440c63.11, p1440c63.8, p855c67.163, p1440c63.84,<br>p1015c69.247, p665c65.52, p596c69.2, p329c71.312, p855c67.168, p775c64.23,<br>p2791c66.18, p1440c63.43, p3924c64.35, p238c64.67, p445c59.50, p8162c67.79,<br>p737c53.70, p3924c64.16, p775c64.20, p1440c63.115, p1440c63.119,<br>p665c65.58,                                                    |
| GO:0006508<br>proteolysis                                       | 1.65E-60                    | 49                     | 684                         | p1440c63.113, p664c69.11, p855c67.174, p807c65.17, p1440c63.126,<br>p3924c64.18, p1440c63.80, p543c70.163, p1440c63.23, p1440c63.36,<br>p1440c63.12, p3924c64.17, p1440c63.63, p775c64.19, p3924c64.1, p665c65.51,<br>p664c69.19, p428c65.20, p1440c63.105, p665c65.34, p445c59.46, p1440c63.3,<br>p1412c61.10, p1440c63.11, p1440c63.8, p855c67.163, p1440c63.84,<br>p1015c69.247, p665c65.52, p596c69.2, p329c71.312, p855c67.168, p775c64.23,<br>p2791c66.18, p1440c63.43, p3924c64.35, p238c64.67, p445c59.50, p8162c67.79,<br>p737c53.70, p3924c64.16, p775c64.20, p1440c63.115, p1440c63.119,<br>p1510c68.4, p89c59.118, p22c64.145, p665c65.58, p258731c69.52, |
| GO:0004869<br>cysteine-type endopeptidase<br>inhibitor activity | 6.52E-05                    | 2                      | 6                           | p34c66.53, p34c66.54,                                                                                                                                                                                                                                                                                                                                                                                                                                                                                                                                                                                                                                                 |
| GO:0006952<br>defense response                                  | 1.95E-04                    | 2                      | 10                          | p4035c66.3, p606c64.1,                                                                                                                                                                                                                                                                                                                                                                                                                                                                                                                                                                                                                                                |
| GO:0043169<br>cation binding                                    | 2.38E-04                    | 2                      | 11                          | p128c64.183, p1548c63.54,                                                                                                                                                                                                                                                                                                                                                                                                                                                                                                                                                                                                                                             |
| GO:0006885<br>regulation of pH                                  | 3.36E-04                    | 2                      | 13                          | p11c67.36, p1947c65.69,                                                                                                                                                                                                                                                                                                                                                                                                                                                                                                                                                                                                                                               |
| GO:0006730<br>one-carbon metabolic process                      | 4.51E-04                    | 2                      | 15                          | p1053c67.29, p1947c65.69,                                                                                                                                                                                                                                                                                                                                                                                                                                                                                                                                                                                                                                             |
| GO:0005975<br>carbohydrate metabolic process                    | 4.67E-04                    | 4                      | 169                         | p590c70.27, p128c64.183, p105c62.18, p1548c63.54,                                                                                                                                                                                                                                                                                                                                                                                                                                                                                                                                                                                                                     |
| GO:0048856<br>anatomical structure development                  | 9.83E-04                    | 2                      | 22                          | p1440c63.115, p1440c63.119,                                                                                                                                                                                                                                                                                                                                                                                                                                                                                                                                                                                                                                           |

**Supplementary table 14** Applied species for the comparative genomic analysis

Detailed data was deposited for FigShare (DOI 10.6084/m9.figshare.12318908)

| Abbreviation in Fig. 5 | Pictogram                                                                           | Scientific name                                 | Data source                                                                                                                               |
|------------------------|-------------------------------------------------------------------------------------|-------------------------------------------------|-------------------------------------------------------------------------------------------------------------------------------------------|
| Mmu                    |    | <i>Mus musculus</i>                             | Uniprot; 10090 ("Reviewed" genes only)                                                                                                    |
| Hsa                    |    | <i>Homo sapiens</i>                             | Uniprot; 9606 ("Reviewed" genes only)                                                                                                     |
| Dre                    |    | <i>Danio rerio</i>                              | Uniprot;7739                                                                                                                              |
| Bfl                    |    | <i>Branchiostoma floridae</i>                   | Uniprot;7955                                                                                                                              |
| Dme                    |    | <i>Drosophila melanogaster</i>                  | Uniprot; 7227                                                                                                                             |
| Bmo                    |    | <i>Bombyx mori</i>                              | Uniprot; 7091                                                                                                                             |
| Api                    |    | <i>Acyrtosiphon pisum</i>                       | Uniprot; 7029                                                                                                                             |
| Cte                    |    | <i>Capitella teleta</i>                         | Uniprot;283909                                                                                                                            |
| Lan                    |    | <i>Lingula anatina</i> (synonym <i>unguis</i> ) | Uniprot; 7574                                                                                                                             |
| Obi                    |    | <i>Octopus bimaculoides</i>                     | INSDC; PRJNA270931                                                                                                                        |
| Cgi                    |   | <i>Crassostrea gigas</i> (oyster_v9)            | INSDC; PRJNA276446                                                                                                                        |
| Pfu                    |  | <i>Pinctada fucata</i> (v2.0)                   | <a href="http://marinegenomics.oist.jp/pearl/viewer/info?project_id=36">http://marinegenomics.oist.jp/pearl/viewer/info?project_id=36</a> |
| Hdi                    |  | <i>Haliotis discus</i>                          | <a href="http://gigadb.org/dataset/100281">http://gigadb.org/dataset/100281</a>                                                           |
| Lgi                    |  | <i>Lottia gigantea</i>                          | INSDC; PRJNA259762                                                                                                                        |
| Bgl                    |  | <i>Biomphalaria glabrata</i> (ASM45736v1)       | INSDC; PRJNA290623                                                                                                                        |
| Aca                    |  | <i>Aplysia californica</i> (AplCal3.0)          | INSDC; PRJNA209509                                                                                                                        |
| PoB                    |  | <i>Plakobanchus ocellatus</i> type black        | Present study                                                                                                                             |
| Ema                    |  | <i>Elysia marginata</i>                         | Present study                                                                                                                             |



**Supplementary Table 15** Cross-tabulation table for the significant enrichment analysis of DG-upregulated gene number on the PoB-expanded orthogroup.

| Orthogroup by Orthofinder | DG-upregulated |       | P-value   | q-value by Benjamini-Hochberg method |
|---------------------------|----------------|-------|-----------|--------------------------------------|
|                           | YES            | NO    |           |                                      |
| OG0000132                 | YES            | 45    | 8.16E-79  | 5.E-78                               |
|                           | NO             | 76910 |           |                                      |
| OG0000005                 | YES            | 18    | 1.87E-19  | 6.E-19                               |
|                           | NO             | 76719 |           |                                      |
| OG0000446                 | YES            | 4     | 0.0000007 | 0.0000015                            |
|                           | NO             | 77039 |           |                                      |
| OG0000002                 | YES            | 2     | 0.5998108 | 0.5998108                            |
|                           | NO             | 75220 |           |                                      |
| OG0009179                 | YES            | 2     | 0.0003914 | 0.0005871                            |
|                           | NO             | 77056 |           |                                      |
| OG0000194                 | YES            | 1     | 0.0511495 | 0.0613794                            |
|                           | NO             | 77044 |           |                                      |

**Supplementary Table 16** *E. marginata* scaffolds determined as bacterial contaminants.

The mean depth of read-coverage was obtained from qualimap. The mean coverage of reliable sea-slug scaffolds = 12 (SD = 2.7)

| Scaffold name       | # Assigned gene to each |                 | # all assigned genes | % assigned |                 | Length of scaffold | Mean depth of read coverage | Contaminant |
|---------------------|-------------------------|-----------------|----------------------|------------|-----------------|--------------------|-----------------------------|-------------|
|                     | taxon                   |                 |                      | %Bacteria  | Lophotrochozoan |                    |                             |             |
|                     | Bacteria                | Lophotrochozoan |                      |            |                 |                    |                             |             |
| scaffold23590_cov9  | 20                      | 0               | 0                    | 100%       | 0%              | 40162              | 3                           | Y           |
| scaffold39866_cov8  | 12                      | 0               | 0                    | 100%       | 0%              | 10506              | 2                           | Y           |
| scaffold51037_cov8  | 9                       | 0               | 0                    | 100%       | 0%              | 7322               | 2                           | Y           |
| scaffold9184_cov10  | 9                       | 0               | 0                    | 100%       | 0%              | 12665              | 3                           | Y           |
| scaffold17697_cov9  | 8                       | 0               | 0                    | 100%       | 0%              | 7808               | 3                           | Y           |
| scaffold11600_cov9  | 7                       | 0               | 0                    | 100%       | 0%              | 18938              | 2                           | Y           |
| scaffold34081_cov9  | 7                       | 0               | 0                    | 100%       | 0%              | 10089              | 2                           | Y           |
| scaffold13134_cov9  | 7                       | 0               | 0                    | 100%       | 0%              | 8506               | 3                           | Y           |
| scaffold39263_cov9  | 7                       | 0               | 0                    | 100%       | 0%              | 11387              | 3                           | Y           |
| scaffold31936_cov25 | 7                       | 0               | 0                    | 100%       | 0%              | 17157              | 6                           | Y           |
| scaffold14781_cov8  | 6                       | 0               | 0                    | 100%       | 0%              | 10946              | 2                           | Y           |
| scaffold41731_cov8  | 6                       | 0               | 0                    | 100%       | 0%              | 8371               | 2                           | Y           |
| scaffold35011_cov8  | 6                       | 0               | 0                    | 100%       | 0%              | 12920              | 2                           | Y           |
| scaffold93349_cov10 | 6                       | 0               | 0                    | 100%       | 0%              | 12781              | 2                           | Y           |
| scaffold38871_cov8  | 6                       | 0               | 0                    | 100%       | 0%              | 4726               | 2                           | Y           |
| scaffold92553_cov8  | 6                       | 0               | 0                    | 100%       | 0%              | 7722               | 3                           | Y           |
| scaffold42214_cov8  | 5                       | 0               | 0                    | 100%       | 0%              | 5442               | 2                           | Y           |
| scaffold63069_cov8  | 5                       | 0               | 0                    | 100%       | 0%              | 3474               | 3                           | Y           |
| scaffold21396_cov9  | 5                       | 0               | 0                    | 100%       | 0%              | 5378               | 3                           | Y           |
| scaffold48418_cov9  | 5                       | 0               | 0                    | 100%       | 0%              | 6054               | 3                           | Y           |
| scaffold26067_cov9  | 5                       | 0               | 0                    | 100%       | 0%              | 3822               | 3                           | Y           |
| scaffold3896_cov9   | 4                       | 0               | 0                    | 100%       | 0%              | 7642               | 2                           | Y           |
| scaffold5429_cov8   | 4                       | 0               | 0                    | 100%       | 0%              | 8932               | 2                           | Y           |
| scaffold48374_cov9  | 4                       | 0               | 0                    | 100%       | 0%              | 4921               | 2                           | Y           |
| scaffold65911_cov9  | 4                       | 0               | 0                    | 100%       | 0%              | 5318               | 2                           | Y           |
| scaffold11877_cov9  | 4                       | 0               | 0                    | 100%       | 0%              | 8275               | 3                           | Y           |
| scaffold31476_cov8  | 4                       | 0               | 0                    | 100%       | 0%              | 5287               | 3                           | Y           |
| scaffold40886_cov10 | 4                       | 0               | 0                    | 100%       | 0%              | 2666               | 3                           | Y           |
| scaffold7979_cov8   | 4                       | 0               | 0                    | 100%       | 0%              | 2732               | 3                           | Y           |
| scaffold23464_cov9  | 3                       | 0               | 0                    | 100%       | 0%              | 14253              | 1                           | Y           |
| scaffold73315_cov8  | 3                       | 0               | 0                    | 100%       | 0%              | 4286               | 2                           | Y           |

**Supplementary Table 16** (continue)

| Scaffold name        | # Assigned gene to each |                 | # all<br>assigned<br>genes | %Bacteria | %  | Length of<br>scaffold | Mean<br>depth of<br>read<br>coverage | Contaminant |
|----------------------|-------------------------|-----------------|----------------------------|-----------|----|-----------------------|--------------------------------------|-------------|
|                      | taxon                   |                 |                            |           |    |                       |                                      |             |
|                      | Bacteria                | Lophotrochozoan |                            |           |    |                       |                                      |             |
| scaffold157565_cov8  | 3                       | 0               | 0                          | 100%      | 0% | 5013                  | 2                                    | Y           |
| scaffold77011_cov8   | 3                       | 0               | 0                          | 100%      | 0% | 8007                  | 2                                    | Y           |
| scaffold34019_cov9   | 3                       | 0               | 0                          | 100%      | 0% | 8123                  | 2                                    | Y           |
| scaffold83306_cov9   | 3                       | 0               | 0                          | 100%      | 0% | 4099                  | 2                                    | Y           |
| scaffold129716_cov8  | 3                       | 0               | 0                          | 100%      | 0% | 2759                  | 2                                    | Y           |
| scaffold32111_cov8   | 3                       | 0               | 0                          | 100%      | 0% | 5348                  | 2                                    | Y           |
| scaffold32000_cov9   | 3                       | 0               | 0                          | 100%      | 0% | 9779                  | 2                                    | Y           |
| scaffold35097_cov9   | 3                       | 0               | 0                          | 100%      | 0% | 11436                 | 2                                    | Y           |
| scaffold82518_cov9   | 3                       | 0               | 0                          | 100%      | 0% | 8213                  | 2                                    | Y           |
| scaffold55489_cov8   | 3                       | 0               | 0                          | 100%      | 0% | 2739                  | 2                                    | Y           |
| scaffold21071_cov7   | 3                       | 0               | 0                          | 100%      | 0% | 2613                  | 2                                    | Y           |
| scaffold100012_cov10 | 3                       | 0               | 0                          | 100%      | 0% | 6095                  | 2                                    | Y           |
| scaffold199_cov8     | 3                       | 0               | 0                          | 100%      | 0% | 5988                  | 2                                    | Y           |
| scaffold111304_cov9  | 3                       | 0               | 0                          | 100%      | 0% | 3973                  | 2                                    | Y           |
| scaffold35599_cov9   | 3                       | 0               | 0                          | 100%      | 0% | 2714                  | 2                                    | Y           |
| scaffold114815_cov7  | 3                       | 0               | 0                          | 100%      | 0% | 2772                  | 3                                    | Y           |
| scaffold91979_cov9   | 3                       | 0               | 0                          | 100%      | 0% | 2272                  | 3                                    | Y           |
| scaffold118630_cov7  | 3                       | 0               | 0                          | 100%      | 0% | 2962                  | 3                                    | Y           |
| scaffold20629_cov8   | 3                       | 0               | 0                          | 100%      | 0% | 3842                  | 3                                    | Y           |
| scaffold27965_cov10  | 3                       | 0               | 0                          | 100%      | 0% | 2232                  | 3                                    | Y           |
| scaffold6368_cov9    | 3                       | 0               | 0                          | 100%      | 0% | 4506                  | 3                                    | Y           |
| scaffold14877_cov8   | 3                       | 0               | 0                          | 100%      | 0% | 5181                  | 3                                    | Y           |
| scaffold9742_cov10   | 3                       | 0               | 0                          | 100%      | 0% | 4534                  | 3                                    | Y           |
| scaffold84644_cov7   | 3                       | 0               | 0                          | 100%      | 0% | 2016                  | 3                                    | Y           |
| scaffold28513_cov8   | 3                       | 0               | 0                          | 100%      | 0% | 4439                  | 3                                    | Y           |
| scaffold4272_cov8    | 3                       | 0               | 0                          | 100%      | 0% | 2659                  | 3                                    | Y           |
| scaffold134952_cov9  | 3                       | 0               | 0                          | 100%      | 0% | 2037                  | 3                                    | Y           |
| scaffold95757_cov8   | 3                       | 0               | 0                          | 100%      | 0% | 2707                  | 3                                    | Y           |
| scaffold36125_cov9   | 3                       | 0               | 0                          | 100%      | 0% | 2946                  | 3                                    | Y           |
| scaffold81605_cov10  | 3                       | 0               | 0                          | 100%      | 0% | 2203                  | 3                                    | Y           |
| scaffold109203_cov9  | 3                       | 0               | 0                          | 100%      | 0% | 4044                  | 3                                    | Y           |

**Supplementary Table 16** (continue)

| Scaffold name       | # Assigned gene to each |                 | # all<br>assigned<br>genes | %Bacteria | %  | Lophotrochozoan | Length of<br>scaffold | Mean<br>depth of<br>read<br>coverage | Contaminant |
|---------------------|-------------------------|-----------------|----------------------------|-----------|----|-----------------|-----------------------|--------------------------------------|-------------|
|                     | taxon                   |                 |                            |           |    |                 |                       |                                      |             |
|                     | Bacteria                | Lophotrochozoan |                            |           |    |                 |                       |                                      |             |
| scaffold60887_cov9  | 2                       | 0               | 0                          | 100%      | 0% | 5707            | 2                     | Y                                    |             |
| scaffold89507_cov8  | 2                       | 0               | 0                          | 100%      | 0% | 2694            | 2                     | Y                                    |             |
| scaffold171847_cov8 | 2                       | 0               | 0                          | 100%      | 0% | 2399            | 2                     | Y                                    |             |
| scaffold82519_cov9  | 2                       | 0               | 0                          | 100%      | 0% | 4591            | 2                     | Y                                    |             |
| scaffold68312_cov8  | 2                       | 0               | 0                          | 100%      | 0% | 2015            | 2                     | Y                                    |             |
| scaffold50258_cov9  | 2                       | 0               | 0                          | 100%      | 0% | 8070            | 2                     | Y                                    |             |
| scaffold122550_cov7 | 2                       | 0               | 0                          | 100%      | 0% | 2347            | 2                     | Y                                    |             |
| scaffold83650_cov8  | 2                       | 0               | 0                          | 100%      | 0% | 6499            | 2                     | Y                                    |             |
| scaffold32242_cov8  | 2                       | 0               | 0                          | 100%      | 0% | 3866            | 2                     | Y                                    |             |
| scaffold67918_cov8  | 2                       | 0               | 0                          | 100%      | 0% | 2095            | 2                     | Y                                    |             |
| scaffold72779_cov9  | 2                       | 0               | 0                          | 100%      | 0% | 2268            | 2                     | Y                                    |             |
| scaffold154054_cov8 | 2                       | 0               | 0                          | 100%      | 0% | 2095            | 2                     | Y                                    |             |
| scaffold45258_cov7  | 2                       | 0               | 0                          | 100%      | 0% | 2314            | 2                     | Y                                    |             |
| scaffold46247_cov6  | 2                       | 0               | 0                          | 100%      | 0% | 2136            | 2                     | Y                                    |             |
| scaffold122674_cov7 | 2                       | 0               | 0                          | 100%      | 0% | 2601            | 2                     | Y                                    |             |
| scaffold98356_cov8  | 2                       | 0               | 0                          | 100%      | 0% | 2538            | 2                     | Y                                    |             |
| scaffold72280_cov8  | 2                       | 0               | 0                          | 100%      | 0% | 5647            | 2                     | Y                                    |             |
| scaffold64373_cov7  | 2                       | 0               | 0                          | 100%      | 0% | 2139            | 2                     | Y                                    |             |
| scaffold59031_cov7  | 2                       | 0               | 0                          | 100%      | 0% | 2173            | 2                     | Y                                    |             |
| scaffold37748_cov8  | 2                       | 0               | 0                          | 100%      | 0% | 3106            | 2                     | Y                                    |             |
| scaffold27682_cov8  | 2                       | 0               | 0                          | 100%      | 0% | 5920            | 2                     | Y                                    |             |
| scaffold33277_cov8  | 2                       | 0               | 0                          | 100%      | 0% | 2430            | 2                     | Y                                    |             |
| scaffold63561_cov8  | 2                       | 0               | 0                          | 100%      | 0% | 5671            | 2                     | Y                                    |             |
| scaffold57482_cov7  | 2                       | 0               | 0                          | 100%      | 0% | 2227            | 3                     | Y                                    |             |
| scaffold58575_cov9  | 2                       | 0               | 0                          | 100%      | 0% | 2743            | 3                     | Y                                    |             |
| scaffold44101_cov9  | 2                       | 0               | 0                          | 100%      | 0% | 2003            | 3                     | Y                                    |             |
| scaffold12309_cov8  | 2                       | 0               | 0                          | 100%      | 0% | 2715            | 3                     | Y                                    |             |
| scaffold61678_cov9  | 2                       | 0               | 0                          | 100%      | 0% | 2513            | 3                     | Y                                    |             |
| scaffold7531_cov9   | 2                       | 0               | 0                          | 100%      | 0% | 3787            | 3                     | Y                                    |             |
| scaffold39421_cov7  | 2                       | 0               | 0                          | 100%      | 0% | 2139            | 3                     | Y                                    |             |
| scaffold66144_cov9  | 2                       | 0               | 0                          | 100%      | 0% | 4130            | 3                     | Y                                    |             |

**Supplementary Table 16** (continue)

| Scaffold name        | # Assigned gene to each |                 | # all<br>assigned<br>genes | %Bacteria | %  | Lophotrochozoan | Length of<br>scaffold | Mean<br>depth of<br>read<br>coverage | Contaminant |
|----------------------|-------------------------|-----------------|----------------------------|-----------|----|-----------------|-----------------------|--------------------------------------|-------------|
|                      | taxon                   |                 |                            |           |    |                 |                       |                                      |             |
|                      | Bacteria                | Lophotrochozoan |                            |           |    |                 |                       |                                      |             |
| scaffold91578_cov8   | 2                       | 0               | 0                          | 100%      | 0% | 2021            | 3                     | Y                                    |             |
| scaffold5033_cov8    | 2                       | 0               | 0                          | 100%      | 0% | 2948            | 3                     | Y                                    |             |
| scaffold86910_cov8   | 2                       | 0               | 0                          | 100%      | 0% | 3134            | 3                     | Y                                    |             |
| scaffold38224_cov7   | 2                       | 0               | 0                          | 100%      | 0% | 2232            | 3                     | Y                                    |             |
| scaffold98184_cov8   | 2                       | 0               | 0                          | 100%      | 0% | 2352            | 3                     | Y                                    |             |
| scaffold150251_cov7  | 2                       | 0               | 0                          | 100%      | 0% | 2527            | 3                     | Y                                    |             |
| scaffold32703_cov9   | 2                       | 0               | 0                          | 100%      | 0% | 3846            | 3                     | Y                                    |             |
| scaffold96059_cov8   | 2                       | 0               | 0                          | 100%      | 0% | 2135            | 3                     | Y                                    |             |
| scaffold110604_cov10 | 2                       | 0               | 0                          | 100%      | 0% | 4361            | 3                     | Y                                    |             |
| scaffold143394_cov7  | 2                       | 0               | 0                          | 100%      | 0% | 2104            | 3                     | Y                                    |             |
| scaffold57862_cov7   | 2                       | 0               | 0                          | 100%      | 0% | 2106            | 3                     | Y                                    |             |
| scaffold116596_cov11 | 2                       | 0               | 0                          | 100%      | 0% | 3475            | 3                     | Y                                    |             |
| scaffold83170_cov10  | 2                       | 0               | 0                          | 100%      | 0% | 7084            | 3                     | Y                                    |             |
| scaffold166938_cov10 | 2                       | 0               | 0                          | 100%      | 0% | 2546            | 3                     | Y                                    |             |
| scaffold6277_cov8    | 2                       | 0               | 0                          | 100%      | 0% | 2015            | 3                     | Y                                    |             |
| scaffold23621_cov8   | 2                       | 0               | 0                          | 100%      | 0% | 2169            | 3                     | Y                                    |             |
| scaffold50970_cov15  | 2                       | 0               | 0                          | 100%      | 0% | 2288            | 4                     | Y                                    |             |
| scaffold200571_cov70 | 3                       | 0               | 0                          | 100%      | 0% | 5335            | 17                    | N                                    |             |
| scaffold66964_cov62  | 4                       | 0               | 0                          | 100%      | 0% | 7570            | 18                    | N                                    |             |
| scaffold56391_cov74  | 6                       | 0               | 0                          | 100%      | 0% | 10556           | 19                    | N                                    |             |
| scaffold212257_cov72 | 5                       | 0               | 0                          | 100%      | 0% | 8763            | 19                    | N                                    |             |
| scaffold214892_cov71 | 17                      | 0               | 0                          | 100%      | 0% | 52790           | 19                    | N                                    |             |
| scaffold21315_cov69  | 56                      | 0               | 0                          | 100%      | 0% | 117125          | 19                    | N                                    |             |
| scaffold25863_cov72  | 31                      | 0               | 0                          | 100%      | 0% | 85382           | 20                    | N                                    |             |
| scaffold35214_cov28  | 2                       | 0               | 0                          | 100%      | 0% | 2296            | 20                    | N                                    |             |
| scaffold62180_cov71  | 6                       | 0               | 0                          | 100%      | 0% | 25437           | 20                    | N                                    |             |
| scaffold12740_cov69  | 13                      | 0               | 0                          | 100%      | 0% | 36389           | 20                    | N                                    |             |
| scaffold93141_cov74  | 5                       | 0               | 0                          | 100%      | 0% | 18595           | 21                    | N                                    |             |
| scaffold12646_cov69  | 15                      | 0               | 0                          | 100%      | 0% | 39111           | 21                    | N                                    |             |
| scaffold229251_cov77 | 2                       | 0               | 0                          | 100%      | 0% | 3578            | 21                    | N                                    |             |
| scaffold230446_cov77 | 2                       | 0               | 0                          | 100%      | 0% | 5601            | 21                    | N                                    |             |

**Supplementary Table 16** (continue)

| Scaffold name        | # Assigned gene to each |                 | # all<br>assigned<br>genes | %Bacteria | %Lophotrochozoan | Length of<br>scaffold | Mean<br>depth of<br>read<br>coverage | Contaminant |
|----------------------|-------------------------|-----------------|----------------------------|-----------|------------------|-----------------------|--------------------------------------|-------------|
|                      | Bacteria                | Lophotrochozoan |                            |           |                  |                       |                                      |             |
| scaffold72533_cov71  | 3                       | 0               | 0                          | 100%      | 0%               | 5740                  | 21                                   | N           |
| scaffold45687_cov70  | 3                       | 0               | 0                          | 100%      | 0%               | 3300                  | 21                                   | N           |
| scaffold230466_cov77 | 2                       | 0               | 0                          | 100%      | 0%               | 2863                  | 21                                   | N           |
| scaffold199637_cov69 | 2                       | 0               | 0                          | 100%      | 0%               | 3300                  | 21                                   | N           |
| scaffold93143_cov73  | 7                       | 0               | 0                          | 100%      | 0%               | 21492                 | 22                                   | N           |
| scaffold227732_cov77 | 6                       | 0               | 0                          | 100%      | 0%               | 14063                 | 22                                   | N           |
| scaffold102818_cov73 | 11                      | 0               | 0                          | 100%      | 0%               | 24962                 | 22                                   | N           |
| scaffold97498_cov70  | 6                       | 0               | 0                          | 100%      | 0%               | 12816                 | 22                                   | N           |
| scaffold231090_cov78 | 2                       | 0               | 0                          | 100%      | 0%               | 4748                  | 22                                   | N           |
| scaffold227021_cov78 | 3                       | 0               | 0                          | 100%      | 0%               | 4012                  | 22                                   | N           |
| scaffold230855_cov77 | 2                       | 0               | 0                          | 100%      | 0%               | 4406                  | 22                                   | N           |
| scaffold224935_cov77 | 3                       | 0               | 0                          | 100%      | 0%               | 3310                  | 22                                   | N           |
| scaffold228045_cov77 | 6                       | 0               | 0                          | 100%      | 0%               | 11778                 | 22                                   | N           |
| scaffold230030_cov78 | 3                       | 0               | 0                          | 100%      | 0%               | 5970                  | 22                                   | N           |
| scaffold228658_cov78 | 2                       | 0               | 0                          | 100%      | 0%               | 9631                  | 22                                   | N           |
| scaffold229924_cov80 | 2                       | 0               | 0                          | 100%      | 0%               | 3921                  | 22                                   | N           |
| scaffold78637_cov71  | 8                       | 0               | 0                          | 100%      | 0%               | 11055                 | 23                                   | N           |
| scaffold228295_cov78 | 3                       | 0               | 0                          | 100%      | 0%               | 8155                  | 23                                   | N           |
| scaffold224632_cov77 | 2                       | 0               | 0                          | 100%      | 0%               | 4617                  | 23                                   | N           |
| scaffold225617_cov78 | 2                       | 0               | 0                          | 100%      | 0%               | 2638                  | 23                                   | N           |
| scaffold228972_cov80 | 2                       | 0               | 0                          | 100%      | 0%               | 7002                  | 23                                   | N           |
| scaffold228172_cov78 | 3                       | 0               | 0                          | 100%      | 0%               | 5707                  | 23                                   | N           |
| scaffold225641_cov80 | 3                       | 0               | 0                          | 100%      | 0%               | 5947                  | 24                                   | N           |
| scaffold230027_cov78 | 3                       | 0               | 0                          | 100%      | 0%               | 5277                  | 24                                   | N           |
| scaffold225951_cov82 | 3                       | 0               | 0                          | 100%      | 0%               | 5099                  | 25                                   | N           |
| scaffold230955_cov77 | 2                       | 0               | 0                          | 100%      | 0%               | 4045                  | 25                                   | N           |

**Supplementary Table 17** *E. marginata* scaffolds determined as kleptoplast/mitochondrial DNA

Kp, kleptoplast DNA. Mt, mitochondrial DNA.

| Scaffold ID            | Blastn Bits score                 |              | Length of scaffold | Mean depth of read coverage | Contaminant |
|------------------------|-----------------------------------|--------------|--------------------|-----------------------------|-------------|
|                        | Query: <i>Bryopsis</i>            | Query: PoB   |                    |                             |             |
|                        | <i>hypnoides</i><br>(NC_013359.1) | mitochondria |                    |                             |             |
| scaffold225599_cov800  | 11103                             | -            | 6426               | 211                         | Kp          |
| scaffold226864_cov1102 | 9751                              | -            | 6439               | 324                         | Kp          |
| scaffold226859_cov908  | 9690                              | -            | 5339               | 267                         | Kp          |
| scaffold226412_cov833  | 9631                              | -            | 5265               | 229                         | Kp          |
| scaffold227624_cov983  | 9081                              | -            | 5164               | 302                         | Kp          |
| scaffold227068_cov1079 | 8386                              | -            | 4605               | 294                         | Kp          |
| scaffold226732_cov826  | 8072                              | -            | 4407               | 224                         | Kp          |
| scaffold224802_cov999  | 7880                              | -            | 4325               | 289                         | Kp          |
| scaffold226090_cov853  | 7315                              | -            | 4036               | 244                         | Kp          |
| scaffold229670_cov1043 | 6191                              | -            | 3640               | 303                         | Kp          |
| scaffold227707_cov845  | 5463                              | -            | 3006               | 249                         | Kp          |
| scaffold231044_cov864  | 5121                              | -            | 2791               | 226                         | Kp          |
| scaffold227481_cov1024 | 4979                              | -            | 2699               | 301                         | Kp          |
| scaffold230536_cov963  | 4953                              | -            | 2726               | 250                         | Kp          |
| scaffold228103_cov969  | 4466                              | -            | 2446               | 267                         | Kp          |
| scaffold231292_cov925  | 4333                              | -            | 2408               | 243                         | Kp          |
| scaffold230892_cov944  | 4292                              | -            | 2854               | 258                         | Kp          |
| scaffold225945_cov1033 | 4067                              | -            | 2244               | 291                         | Kp          |
| scaffold227228_cov1106 | 3973                              | -            | 2218               | 318                         | Kp          |
| scaffold230563_cov1102 | 3930                              | -            | 2149               | 307                         | Kp          |
| scaffold229916_cov877  | 3722                              | -            | 2055               | 253                         | Kp          |
| scaffold229771_cov921  | 3531                              | -            | 2020               | 251                         | Kp          |
| scaffold228521_cov891  | 3125                              | -            | 2181               | 250                         | Kp          |
| scaffold224398_cov872  | 2001                              | -            | 2918               | 242                         | Kp          |
| scaffold228088_cov814  | 1980                              | -            | 3692               | 224                         | Kp          |
| scaffold227279_cov3491 | -                                 | 8222         | 14136              | 965                         | Mt          |





**Supplementary Table 19** Composition information of DNA extraction solutions for *P. ocellatus* genomic DNA

|                            | 2X CTAB buffer<br>(50 ml) | 10% CTAB<br>solution (50 ml) | CTAB<br>precipitation<br>buffer (50 ml) | High salt TE<br>buffer (50 ml) |
|----------------------------|---------------------------|------------------------------|-----------------------------------------|--------------------------------|
| CTAB                       | 1 g                       | 5 g                          | 0.5 g                                   | -                              |
| NaCl (1.4M)                | 4.1 g                     | 4.1 g                        | -                                       | 3 g                            |
| 1M Tris-CHI pH 8.0 (100mM) | 5 ml                      | 5 ml                         | 2.5 ml                                  | 0.5ml                          |
| 0.5M EDTA pH 8.0 (20mM)    | 2 ml                      | 2 ml                         | 1 ml                                    | 100 $\mu$ l                    |

**Supplementary Table 20** Result of the Exonerate search (database = the 13 scaffolds determined as kpDNA, query = algal photosynthetic genes [A614])

| Query                            |       |     |        | Target                |       |      |        | score |
|----------------------------------|-------|-----|--------|-----------------------|-------|------|--------|-------|
| ID                               | start | end | strand | ID                    | start | end  | strand |       |
| A8I531                           | 77    | 397 | .      | scaffold265330_cov435 | 253   | 1216 | +      | 557   |
| M1V5Q9                           | 70    | 380 | .      | scaffold265330_cov435 | 256   | 1222 | +      | 407   |
| TRINITY_DN27786_c0_g1_i1 m.16489 | 67    | 387 | .      | scaffold265330_cov435 | 253   | 1216 | +      | 550   |
| c11205_g1_i1 m.22907             | 1     | 302 | .      | scaffold265330_cov435 | 310   | 1216 | +      | 507   |
| c11205_g1_i3 m.22926             | 1     | 302 | .      | scaffold265330_cov435 | 310   | 1216 | +      | 507   |
| c11205_g1_i5 m.22942             | 1     | 302 | .      | scaffold265330_cov435 | 310   | 1216 | +      | 507   |
| g5430.t1                         | 74    | 386 | .      | scaffold265330_cov435 | 277   | 1216 | +      | 568   |
